# Supplementary material for: Stereocontrolled addition of Grignard reagents to oxa-bridged benzazepines: highly efficient synthesis of functionalized benzazepine scaffolds
Source: Royal Society of Chemistry journal article supplement (doi:10.1039/d0ra08758k), 2020-01-01
Supplement: d0ra08758k1.pdf [file d0ra08758k1.pdf]

## Supporting Information

For

# Stereocontrolled Addition of Grignard Reagents to Oxa-Bridged Benzazepines: Highly Efficient Synthesis of Functionalized Benzazepine Scaffolds

Yuewei Zhang <sup>a</sup>, Qingqing Bao <sup>a</sup>, Ning Zhang <sup>a</sup>, Shuohang Wang <sup>a</sup>, Xue Yu <sup>b\*</sup>

<sup>a</sup> School of chemistry and pharmaceutical engineering, Jilin institute of chemical technology, Jilin 132022, China;

<sup>b</sup> Division of science and technology, Jilin institute of chemical technology, Jilin 132022, China;)

### Table of Contents

|                                                                                                   |    |
|---------------------------------------------------------------------------------------------------|----|
| General Experimental Procedures.....                                                              | 2  |
| General Procedure for the Synthesis of <b>S2a</b> , <b>S2c</b> , <b>S2d</b> .....                 | 3  |
| 2-(Diallylamino)-5-methylbenzaldehyde <b>S2b</b> .....                                            | 4  |
| General Procedure for the Synthesis of <b>1a</b> , <b>1c</b> , <b>1d</b> .....                    | 5  |
| 1-Allyl-7-methyl-2,3,4,5-tetrahydro-1 <i>H</i> -2,5-epoxybenzo[ <i>b</i> ]azepine <b>1b</b> ..... | 6  |
| 2,3,4,5-tetrahydro-1 <i>H</i> -2,5-epoxybenzo[ <i>b</i> ]azepine <b>1e</b> .....                  | 8  |
| General Procedure for the Synthesis of <b>2</b> .....                                             | 9  |
| General Procedure for the Synthesis of <b>3</b> .....                                             | 19 |
| Procedure for the Synthesis of <b>4</b> .....                                                     | 26 |
| NMR Spectra.....                                                                                  | 28 |
| X-ray Crystallographic data for Compound syn- <b>2m</b> .....                                     | 65 |
| Confirmation of the ratio of stereoisomers <b>2</b> .....                                         | 65 |

**General Experimental Procedures.** Unless otherwise noted, reactions were carried out in air. Chemicals and solvents were either purchased from commercial suppliers or purified by standard procedures. Analytical thin-layer chromatography (TLC) was performed on silica gel plates with F-254 indicator and compounds were visualized by irradiation with UV light or by treatment with iodine. Flash column chromatography was performed with silica gel 200-300 mesh. The melting point was uncorrected. Mass spectra and HPLC data were recorded on a LC/MS system.  $^1\text{H}$  NMR and  $^{13}\text{C}$  NMR spectra were recorded on 300 MHz and 75 MHz spectrometers respectively. The spectra were recorded in  $\text{CDCl}_3$  as the solvent at room temperature unless otherwise noted.  $^1\text{H}$  and  $^{13}\text{C}$  NMR chemical shifts are reported in ppm relative to TMS as an internal standard. Multiplicities are indicated as follows: s, singlet; d, doublet; t, triplet; q, quartet; m, multiplet; dd, doubled doublet; br, broad. HRMS was recorded on an LC TOF (ES).

Displacement of the 2-fluorobenzaldehyde **S1** using allylamine provided 2-(allylamino)benzaldehyde **S2**. Aldehyde **S2** was transformed into oxa-bridged azepine **1** by the carbonyl ene-type reaction in excellent yields. Subsequently, removal of the allyl group in **1a** with a palladium catalyst furnished amine **1e**, as shown in S-Scheme 1.

### S-Scheme 1. Synthesis of Ring-Opening Precursors

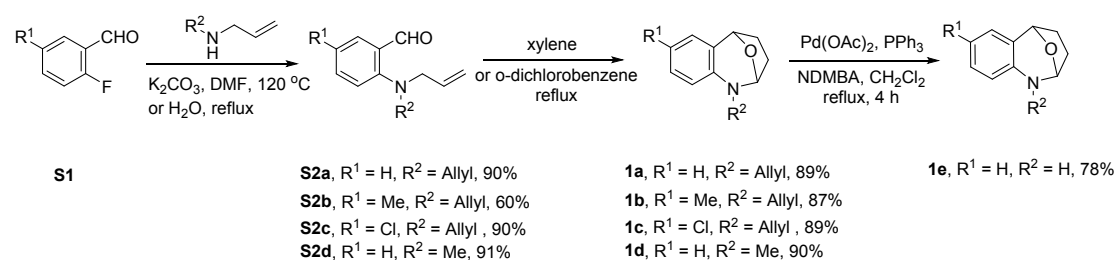

## General Procedure for the Synthesis of S2a, S2c, S2d

To a solution of 2-fluorobenzaldehyde (248 mg, 2 mmol) in water (4 mL) was added secondary amine (2.4 mmol) and  $K_2CO_3$  (0.414 mg, 3 mmol). The reaction mixture was heated at reflux until 2-fluorobenzaldehyde was consumed as monitored by TLC. The reaction solution was then diluted with water (10 mL), and extracted with EtOAc ( $3 \times 15$  mL). The combined organic extracts were washed with brine, dried over anhydrous  $Na_2SO_4$  and concentrated *in vacuo*. Purification by flash column chromatography (petroleum ether/ethyl acetate = 50:1, v/v) afforded the desired product S2.

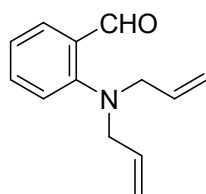

### 2-(Diallylamino)benzaldehyde (S2a)

Pale yellow oil (362 mg, 90% yield);  $^1H$  NMR (300 MHz,  $CDCl_3$ )  $\delta$  10.35 (s, 1H, CHO), 7.80 (dd,  $J = 7.8, 1.8$  Hz, 1H, phenyl-H), 7.55 – 7.36 (m, 1H, phenyl-H), 7.20 – 6.95 (m, 2H, phenyl-H), 5.95 – 5.70 (m, 2H,  $CH_2CH=CH_2$ ), 5.32 – 5.12 (m, 4H,  $2CH_2CH=CH_2$ ), 3.89 – 3.71 (m, 4H,  $2CH_2CH=CH_2$ );  $^{13}C$  NMR (75 MHz,  $CDCl_3$ )  $\delta$  191.4, 154.1, 134.1, 133.8, 129.3, 129.2, 122.0, 121.2, 118.0, 57.18. HRMS (ESI-TOF): calcd. for  $C_{13}H_{16}NO$   $[M + H]^+$  202.1226; found 202.1223.

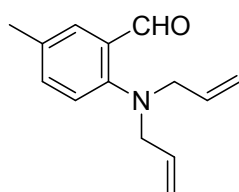

## 2-(Diallylamino)-5-methylbenzaldehyde (S2b)

To a solution of 2-fluoro-5-methylbenzaldehyde (276 mg, 2 mmol) in *N,N*-Dimethylformamide (4 mL) was added diallylamine (0.49 mL, 4 mmol) and  $K_2CO_3$  (0.414 mg, 3 mmol). The reaction mixture was heated at reflux 4 d. The reaction solution was then diluted with water (40 mL), and extracted with EtOAc ( $3 \times 15$  mL). The combined organic extracts were washed with brine, dried over anhydrous  $Na_2SO_4$  and concentrated *in vacuo*. Purification by flash column chromatography (petroleum ether/ethyl acetate = 30:1, v/v) afforded the desired product **2b** (258 mg, 60%) as a pale yellow oil.  $^1H$  NMR (300 MHz,  $CDCl_3$ )  $\delta$  10.38 (s, 1H, CHO), 7.61 (d,  $J = 2.4$  Hz, 1H, phenyl-H), 7.29 (ddd,  $J = 8.4, 2.4, 0.6$  Hz, 1H, phenyl-H), 7.03 (d,  $J = 8.4$  Hz, 1H, phenyl-H), 5.94 – 5.74 (m, 2H,  $CH_2CH=CH_2$ ), 5.23 – 5.13 (m, 4H,  $CH_2CH=CH_2$ ), 3.73 (dt,  $J = 6.0, 1.2$  Hz, 4H,  $CH_2CH=CH_2$ ), 2.32 (s, 3H,  $CH_3$ );  $^{13}C$  NMR (75 MHz,  $CDCl_3$ )  $\delta$  191.9, 152.1, 135.1, 134.0, 132.1, 129.6, 129.1, 121.7, 117.9, 57.5, 20.4; HRMS (ESI-TOF): calcd. for  $C_{14}H_{18}NO$   $[M + H]^+$  216.1383; found 216.1389.

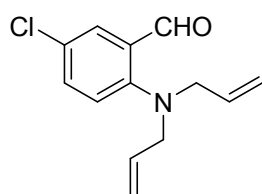

## 5-Chloro-2-(diallylamino)benzaldehyde (S2c)

Pale yellow oil (635 mg, 90% yield).  $^1H$  NMR (300 MHz,  $CDCl_3$ )  $\delta$  10.29 (s, 1H, CHO), 7.75 (d,  $J = 2.7$  Hz, 1H, phenyl-H), 7.40 (dd,  $J = 8.7, 2.7$  Hz, 1H, phenyl-H), 7.05 (d,  $J = 8.7$  Hz, 2H, phenyl-H), 5.93 – 5.66 (m, 2H,  $2CH_2CH=CH_2$ ), 5.36 – 5.08

(m, 4H, 2CH<sub>2</sub>CH=CH<sub>2</sub>), 3.76 (dt,  $J = 6.0, 1.2$  Hz, 4H, 2CH<sub>2</sub>CH=CH<sub>2</sub>); <sup>13</sup>C NMR (75 MHz, CDCl<sub>3</sub>)  $\delta$  190.1, 152.5, 133.9, 133.4, 130.2, 128.7, 127.8, 122.9, 118.4, 57.3; HRMS (ESI-TOF): calcd. for C<sub>13</sub>H<sub>15</sub>ClNO [M + H]<sup>+</sup> 236.0837; found 236.0841.

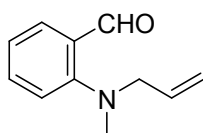

### 2-(Allyl(methyl)amino)benzaldehyde (S2d).

Yellow oil (319 mg, 91% yield); <sup>1</sup>H NMR (CDCl<sub>3</sub>)  $\delta$  10.26 (s, 1H, CHO), 7.78 (dd,  $J = 7.7, 1.6$  Hz, 1H, phenyl-H), 7.55 – 7.38 (m, 1H, phenyl-H), 7.08 (d,  $J = 8.4$  Hz, 1H, phenyl-H), 7.06 – 6.96 (m, 1H, phenyl-H), 5.91 (m, 1H, CH<sub>2</sub>CH=CH<sub>2</sub>), 5.26 (m, 2H, CH<sub>2</sub>CH=CH<sub>2</sub>), 3.73 (d,  $J = 5.7$  Hz, 2H, CH<sub>2</sub>CH=CH<sub>2</sub>), 2.85 (s, 3H, CH<sub>3</sub>); <sup>13</sup>C NMR (75 MHz, CDCl<sub>3</sub>)  $\delta$  191.2, 155.4, 134.4, 134.0, 130.1, 127.7, 121.1, 118.8, 117.8, 61.9, 40.9; HRMS (ESI-TOF): calcd. for C<sub>11</sub>H<sub>14</sub>NO [M + H]<sup>+</sup> 176.1070; found 176.1078.

### General Procedure for the Synthesis of 1a, 1c, 1d

The 2-(allylamino)nicotinaldehyde **S2** (1.0 mmol) was dissolved in xylene (10 mL). The resulting solution was stirred at reflux until **S2** had been consumed, as monitored by TLC. The reaction mixture was purified by flash column chromatography (petroleum ether/ethyl acetate, 30:1, v/v) afforded the desired product **1**.

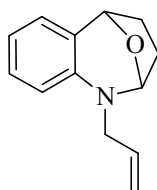

### 1-Allyl-2,3,4,5-tetrahydro-1H-2,5-epoxybenzo[b]azepine (1a).

Pale yellow oil (179 mg, 89% yield);  $^1\text{H}$  NMR (300 MHz,  $\text{CDCl}_3$ )  $\delta$  7.09 (t,  $J = 7.5$  Hz, 1H, phenyl-H), 6.89 (d,  $J = 7.2$  Hz, 1H, phenyl-H), 6.73 – 6.60 (m, 2H, phenyl-H), 6.08 – 5.80 (m, 1H,  $\text{CH}_2\text{CH}=\text{CH}_2$ ), 5.42 – 4.92 (m, 4H,  $\text{CH}_2\text{CH}=\text{CH}_2$  and 2CH), 4.10 – 3.70 (m, 2H,  $\text{CH}_2\text{CH}=\text{CH}_2$ ), 2.30 – 1.94 (m, 4H, 2 $\text{CH}_2$ );  $^{13}\text{C}$  NMR (75 MHz,  $\text{CDCl}_3$ )  $\delta$  141.8, 134.8, 128.2, 128.0, 124.2, 117.7, 116.3, 114.3, 90.3, 89.8, 77.9, 54.4, 36.8, 33.7. HRMS (ESI-TOF): calcd. for  $\text{C}_{13}\text{H}_{16}\text{NO}$   $[\text{M} + \text{H}]^+$  202.1226; found 202.1231.

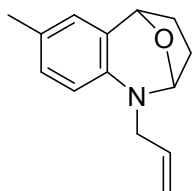

### 1-Allyl-7-methyl-2,3,4,5-tetrahydro-1H-2,5-epoxybenzo[b]azepine (**1b**)

The 2-(diallylamino)-5-methylbenzaldehyde **S2b** (215 mg, 1.0 mmol) was dissolved in orthodichlorobenzene (10 mL). The resulting solution was stirred at reflux 18 h. The reaction mixture was purified by flash column chromatography (petroleum ether/ethyl acetate, 20:1, v/v) afforded the desired product **1b** (187 mg, 87%) as a pale yellow oil.  $^1\text{H}$  NMR (300 MHz,  $\text{CDCl}_3$ )  $\delta$  6.92 (dd,  $J = 8.1, 2.1$  Hz, 1H, phenyl-H), 6.72 (d,  $J = 2.1$  Hz, 1H, phenyl-H), 6.61 (d,  $J = 8.1$  Hz, 1H, phenyl-H), 6.04 – 5.85 (m, 1H,  $\text{CH}_2\text{CH}=\text{CH}_2$ ), 5.35 – 5.24 (m, 1H,  $\text{CH}_2\text{CH}=\text{CH}_2$ ), 5.23 – 5.13 (m, 2H,  $\text{CH}_2\text{CH}=\text{CH}_2$  and CH), 5.00 – 4.92 (m, 1H, CH), 3.94 (ddt,  $J = 16.5, 6.0, 1.5$  Hz, 1H,  $\text{CH}_2\text{CH}=\text{CH}_2$ ), 3.78 (ddt,  $J = 16.5, 4.8, 1.8$  Hz, 1H,  $\text{CH}_2\text{CH}=\text{CH}_2$ ), 2.23 (s, 3H,  $\text{CH}_3$ ), 2.19 – 1.93 (m, 4H, 2 $\text{CH}_2$ );  $^{13}\text{C}$  NMR (75 MHz,  $\text{CDCl}_3$ )  $\delta$  139.7, 135.3, 128.8, 128.5, 127.5, 124.9, 116.4, 115.6, 89.8, 77.6, 55.6, 37.0, 33.1, 20.4; MS (ESI)  $m/z$  216.2  $[\text{M}$

+ H]<sup>+</sup>. HRMS (ESI-TOF): calcd. for C<sub>14</sub>H<sub>18</sub>NO [M + H]<sup>+</sup> 216.1383; found 216.1381.

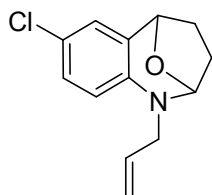

**1-Allyl-7-chloro-2,3,4,5-tetrahydro-1H-2,5-epoxybenzo[*b*]azepine (1c)**

Pale yellow oil (209 mg, 89% yield). <sup>1</sup>H NMR (300 MHz, CDCl<sub>3</sub>) δ 7.04 (dd, *J* = 8.7, 2.4 Hz, 1H, phenyl-H), 6.87 (d, *J* = 2.4 Hz, 1H, phenyl-H), 6.54 (d, *J* = 8.7 Hz, 1H, phenyl-H), 5.96 – 5.80 (m, 1H, CH<sub>2</sub>CH=CH<sub>2</sub>), 5.32 – 5.23 (m, 1H, CH<sub>2</sub>CH=CH<sub>2</sub>), 5.22 – 5.12 (m, 2H, CH<sub>2</sub>CH=CH<sub>2</sub> and CH), 5.02 – 4.95 (m, 1H, CH<sub>2</sub>CH=CH<sub>2</sub>), 3.93 (ddt, *J* = 16.8, 5.7, 1.5 Hz, 1H, CH<sub>2</sub>CH=CH<sub>2</sub>), 3.79 (ddt, *J* = 16.8, 4.8, 1.8 Hz, 1H, CH<sub>2</sub>CH=CH<sub>2</sub>), 2.25 – 2.08 (m, 3H, CH<sub>2</sub>), 2.08 – 1.97 (m, 1H, CH<sub>2</sub>); <sup>13</sup>C NMR (75 MHz, CDCl<sub>3</sub>) δ 140.4, 134.2, 129.5, 127.8, 124.1, 122.3, 116.6, 115.4, 89.8, 77.5, 54.3, 36.6, 33.9; HRMS (ESI-TOF): calcd. for C<sub>13</sub>H<sub>15</sub>ClNO [M + H]<sup>+</sup> 236.0837; found 236.0839.

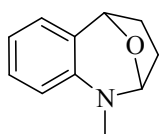

**1-Methyl-2,3,4,5-tetrahydro-1H-2,5-epoxybenzo[*b*]azepine (1d)**

Pale yellow oil (157 mg, 90% yield); <sup>1</sup>H NMR (300 MHz, CDCl<sub>3</sub>) δ 7.18 – 7.04 (m, 1H, phenyl-H), 6.92 – 6.79 (m, 1H, phenyl-H), 6.75 – 6.56 (m, 2H, phenyl-H), 5.14 (d, *J* = 4.5 Hz, 1H, CH), 5.01 (d, *J* = 5.4 Hz, 1H, CH), 2.91 (s, 3H, CH<sub>3</sub>), 2.26 – 1.99 (m, 4H, 2CH<sub>2</sub>); <sup>13</sup>C NMR (75 MHz, CDCl<sub>3</sub>) δ 142.8, 128.1, 124.0, 117.7, 113.9, 91.3,

78.1, 37.5, 36.8, 32.4; HRMS (ESI-TOF): calcd. for C<sub>11</sub>H<sub>14</sub>NO [M + H]<sup>+</sup> 176.1070; found 176.1076.

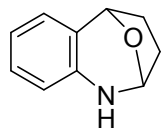

### 2,3,4,5-tetrahydro-1H-2,5-epoxybenzo[b]azepine (1e)

To a solution of compound **1a** (402 mg, 2.0 mmol) in dry CH<sub>2</sub>Cl<sub>2</sub> (20 mL) was added *N,N'*-Dimethylbarbituric acid (936 mg, 6.0 mmol), palladium acetate (9 mg, 0.04 mmol) and triphenylphosphine (47 mg, 0.18 mmol) under argon. The reaction mixture was stirred at 35 °C for 4 h. After cooling, saturated sodium bicarbonate solution was added in the reaction mixture to adjust the pH to 9-10 and extracted with CH<sub>2</sub>Cl<sub>2</sub> (3 × 20 mL). The combined organic extracts were washed with brine, dried over anhydrous Na<sub>2</sub>SO<sub>4</sub> and concentrated *in vacuo*. Purification by flash column chromatography (petroleum ether/ethyl acetate = 5:1, v/v) afforded the desired product **1e** (251 mg, 78% yield) as a white solid, M.P. 70-72 °C. <sup>1</sup>H NMR (300 MHz, CDCl<sub>3</sub>) δ 7.15 – 7.04 (m, 1H, phenyl-H), 6.95 – 6.91 (m, 1H, phenyl-H), 6.83 – 6.71 (m, 1H, phenyl-H), 6.66 – 6.61 (m, 1H, phenyl-H), 5.38 – 5.35 (m, 1H, CH), 5.04 – 5.01 (m, 1H, CH), 2.32 – 2.14 (m, 3H, CH<sub>2</sub>), 2.07 – 2.00 (m, 1H, CH<sub>2</sub>); <sup>13</sup>C NMR (75 MHz, CDCl<sub>3</sub>) δ 139.1, 129.1, 127.8, 124.7, 119.2, 117.1, 84.4, 76.8, 37.1, 34.2; HRMS (ESI-TOF): calcd. for C<sub>10</sub>H<sub>12</sub>NO [M + H]<sup>+</sup> 162.0913; found 162.0918.

### General Procedure for the Synthesis of **2**

To a solution of compound **1** (1.0 mmol) in dry CH<sub>2</sub>Cl<sub>2</sub> (10 mL) at 0 °C was added



Grignard reagent (2.5 mmol). The resulting solution was stirred at 0 °C until compound **1** had been consumed, as monitored by TLC. Then it was treated with saturated aqueous NH<sub>4</sub>Cl (5 mL) and extracted with CH<sub>2</sub>Cl<sub>2</sub> (3 × 20 mL). The combined organic extracts were washed with brine, dried over anhydrous Na<sub>2</sub>SO<sub>4</sub> and concentrated *in vacuo*. Purification by flash column chromatography (petroleum ether/ethyl acetate = 20:1, v/v) afforded the desired product **2**.

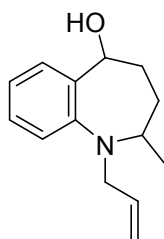

**1-Allyl-2-methyl-2,3,4,5-tetrahydro-1H-benzo[b]azepin-5-ol (2a, syn/anti = 69/31)**

Colourless oil (208 mg, 96%);

**The major isomer syn-2a was obtained by preparative thin layer chromatography.** <sup>1</sup>H NMR (300 MHz, CDCl<sub>3</sub>) δ 7.41 (d, *J* = 7.5 Hz, 1H, phenyl-H), 7.19 (td, *J* = 7.5, 1.5 Hz, 1H, phenyl-H), 7.05 (t, *J* = 7.8 Hz, 1H, phenyl-H), 6.93 (d, *J* = 7.5 Hz, 1H, phenyl-H), 5.92 – 5.75 (m, 1H, CH<sub>2</sub>CH=CH<sub>2</sub>), 5.29 – 5.19 (m, 1H, CH<sub>2</sub>CH=CH<sub>2</sub>), 5.14 – 5.08 (m, 1H, CH<sub>2</sub>CH=CH<sub>2</sub>), 4.99 (dd, *J* = 8.1, 4.8 Hz, 1H, CH(OH)), 3.91 – 3.80 (m, 1H, CH<sub>2</sub>CH=CH<sub>2</sub>), 3.73 – 3.62 (m, 1H, CH<sub>2</sub>CH=CH<sub>2</sub>), 3.37 – 3.20 (m, 1H, CH(Me)), 2.55 (br. s, 1H, OH), 2.14 – 1.90 (m, 1H, CH<sub>2</sub>), 1.87 – 1.55 (m, 2H, CH<sub>2</sub>), 1.51 – 1.34 (m, 1H, CH<sub>2</sub>), 0.81 (d, *J* = 6.6 Hz, 3H, CH<sub>3</sub>); <sup>13</sup>C NMR (75 MHz, CDCl<sub>3</sub>) δ 145.2, 139.3, 136.7, 126.8, 123.6, 122.5, 121.1, 116.7, 71.5, 54.7, 53.0, 32.6, 30.6, 15.2; HRMS (ESI-TOF): calcd. for C<sub>14</sub>H<sub>20</sub>NO [M + H]<sup>+</sup> 218.1539; found 218.1547.

The minor isomer **anti-2a** was obtained by preparative thin layer chromatography. <sup>1</sup>H NMR (300 MHz, CDCl<sub>3</sub>) δ 7.21 – 7.15 (m, 1H, phenyl-H), 7.13 – 7.08 (m, 1H, phenyl-H), 7.03 – 6.90 (m, 2H, phenyl-H), 5.96 – 5.79 (m, 1H, CH<sub>2</sub>CH=CH<sub>2</sub>), 5.32 – 5.24 (m, 1H, CH<sub>2</sub>CH=CH<sub>2</sub>), 5.22 – 5.13 (m, 1H, CH<sub>2</sub>CH=CH<sub>2</sub>), 4.79 (br. s, 1H, OH), 4.71 (t, *J* = 4.5 Hz, 1H, CH (HO)), 3.95 – 3.77 (m, 1H, CH<sub>2</sub>CH=CH<sub>2</sub>), 3.70 – 3.60 (m, 1H, CH<sub>2</sub>CH=CH<sub>2</sub>), 3.47 – 3.35 (m, 1H, CH(Me)), 2.23 – 2.01 (m, 1H, CH<sub>2</sub>), 1.98 – 1.85 (m, 2H, CH<sub>2</sub>), 1.42 – 1.30 (m, 1H, CH<sub>2</sub>), 0.79 (d, *J* = 6.9 Hz, 3H); HRMS (ESI-TOF): calcd. for C<sub>14</sub>H<sub>20</sub>NO [M + H]<sup>+</sup> 218.1539; found 218.1545.

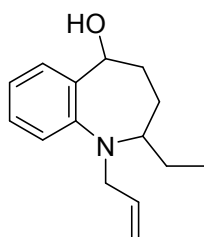

**1-Allyl-2-ethyl-2,3,4,5-tetrahydro-1H-benzo[*b*]azepin-5-ol (2b, syn/anti = 91/9)**

Colourless oil (224 mg, 97%); <sup>1</sup>H NMR (300 MHz, CDCl<sub>3</sub>) δ 7.44 (d, *J* = 7.2 Hz, 1H, phenyl-H), 7.22 – 7.13 (m, 1.1H, phenyl-H), 7.12 – 7.07 (m, 0.1H, phenyl-H), 7.07 – 7.00 (m, 1H, phenyl-H), 6.99 – 6.91 (m, 1.3H, phenyl-H), 5.98 – 5.74 (m, 1H, CH<sub>2</sub>CH=CH<sub>2</sub>), 5.34 – 5.18 (m, 1.2H, CH<sub>2</sub>CH=CH<sub>2</sub>), 5.18–5.05 (m, 1.1H, CH<sub>2</sub>CH=CH<sub>2</sub>), 4.89 (dd, *J* = 9.6, 3.6 Hz, 1H, CH (HO)), 4.71 (d, *J* = 4.5 Hz, 0.1H, CH (HO)), 4.00 – 3.83 (m, 1.2H, CH<sub>2</sub>CH=CH<sub>2</sub>), 3.82 – 3.65 (m, 1.3H, CH<sub>2</sub>CH=CH<sub>2</sub>), 3.18 – 2.94 (m, 1.1H, CH(Et)), 2.29 (br. s, 1H, OH), 2.05 – 1.88 (m, 1.2H, CH<sub>2</sub>), 1.85 – 1.55 (m, 3H, CH<sub>2</sub>), 1.38 – 1.20 (m, 1.2H, CH<sub>2</sub>), 1.05 – 0.85 (m, 1.3H, CH<sub>2</sub>), 0.85 –

0.70 (m, 3.3H, CH<sub>3</sub>); <sup>13</sup>C NMR (75 MHz, CDCl<sub>3</sub>) δ 146.6, 145.7, 139.1, 136.9, 136.0, 127.6, 127.5, 126.6, 123.5, 122.6, 122.1, 121.0, 120.9, 117.6, 116.6, 74.9, 71.9, 60.2, 59.0, 56.0, 55.7, 30.3, 29.2, 27.5, 25.5, 22.5, 21.3, 11.7, 11.5; HRMS (ESI-TOF): calcd. for C<sub>15</sub>H<sub>22</sub>NO [M + H]<sup>+</sup> 232.1696; found 232.1694.

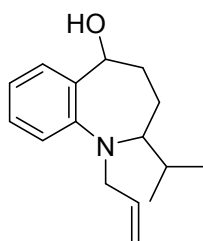

**1-Allyl-2-isopropyl-2,3,4,5-tetrahydro-1H-benzo[b]azepin-5-ol (2c, syn)**

Colourless oil (216 mg, 88%); <sup>1</sup>H NMR (300 MHz, CDCl<sub>3</sub>) δ 7.48 (d, *J* = 7.5 Hz, 1H, phenyl-H), 7.17 (td, *J* = 7.5, 1.2 Hz, 1H, phenyl-H), 7.06 – 6.95 (m, 2H, phenyl-H), 5.90 – 5.73(m, 1H, CH<sub>2</sub>CH=CH<sub>2</sub>), 5.24 – 5.15 (m, 1H, CH<sub>2</sub>CH=CH<sub>2</sub>), 5.11 – 5.05 (m, 1H, CH<sub>2</sub>CH=CH<sub>2</sub>), 4.90 – 4.78 (m, 1H, CH (HO)), 4.11 – 3.97 (m, 1H, CH<sub>2</sub>CH=CH<sub>2</sub>), 3.90 – 3.78 (m, 1H, CH<sub>2</sub>CH=CH<sub>2</sub>), 2.93 – 2.83 (m, 1H, CH(*i*-Pr)), 2.08–1.92 (m, 1H, CH<sub>2</sub>), 1.88 (br. s, 1H, OH), 1.82 – 1.40 (m, 4H, CH<sub>2</sub> and CH), 0.83 (d, *J* = 6.6 Hz, 3H), 0.69 (d, *J* = 6.9 Hz, 3H); <sup>13</sup>C NMR (75 MHz, CDCl<sub>3</sub>) δ 145.7, 139.1, 137.2, 126.5, 123.4, 121.9, 121.7, 116.4, 72.0, 63.8, 57.7, 31.0, 28.9, 27.6, 20.7, 19.2; HRMS (ESI-TOF): calcd. for C<sub>16</sub>H<sub>24</sub>NO [M + H]<sup>+</sup> 246.1852; found 246.1857.

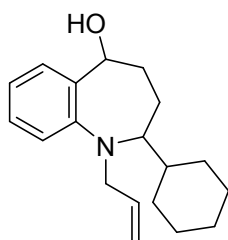

**1-Allyl-2-cyclohexyl-2,3,4,5-tetrahydro-1H-benzo[b]azepin-5-ol (2d, syn)**

Colourless oil (237 mg, 83%);  $^1\text{H}$  NMR (300 MHz,  $\text{CDCl}_3$ )  $\delta$  7.48 (d,  $J = 7.5$  Hz, 1H, phenyl-H), 7.17 (td,  $J = 7.5, 1.5$  Hz, 1H, phenyl-H), 7.07 – 6.94 (m, 2H, phenyl-H), 5.90–5.68 (m, 1H,  $\text{CH}_2\text{CH}=\text{CH}_2$ ), 5.27 – 5.15 (m, 1H,  $\text{CH}_2\text{CH}=\text{CH}_2$ ), 5.12 – 5.03 (m, 1H,  $\text{CH}_2\text{CH}=\text{CH}_2$ ), 4.82 (dd,  $J = 10.2, 3.3$  Hz, 1H, CH (HO)), 4.05 (ddt,  $J = 14.1, 5.1, 1.5$  Hz, 1H,  $\text{CH}_2\text{CH}=\text{CH}_2$ ), 3.90 – 3.72 (m, 1H,  $\text{CH}_2\text{CH}=\text{CH}_2$ ), 3.00 – 2.79 (m, 1H, CH(Cy)), 2.06 – 1.37 (m, 9H, CH and  $\text{CH}_2$ ), 1.35 – 0.69 (m, 6H,  $\text{CH}_2$ );  $^{13}\text{C}$  NMR (75 MHz,  $\text{CDCl}_3$ )  $\delta$  145.7, 139.2, 137.3, 126.5, 123.4, 121.8, 121.7, 116.4, 72.2, 62.5, 58.0, 38.4, 31.0, 29.4, 27.8, 26.4, 26.03, 25.91; MS (ESI)  $m/z$  286.1  $[\text{M} + \text{H}]^+$ . HRMS (ESI-TOF): calcd. for  $\text{C}_{19}\text{H}_{28}\text{NO}$   $[\text{M} + \text{H}]^+$  286.2165; found 286.2170.

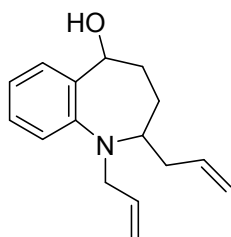

**1,2-Diallyl-2,3,4,5-tetrahydro-1H-benzo[b]azepin-5-ol (2e, anti)**

Colourless oil (238 mg, 98%);  $^1\text{H}$  NMR (300 MHz,  $\text{CDCl}_3$ )  $\delta$  7.22 – 7.14 (m, 1H, phenyl-H), 7.14 – 7.08 (m, 1H, phenyl-H), 7.02 – 6.93 (m, 2H, phenyl-H), 6.00 – 5.80 (m, 1H,  $\text{NCH}_2\text{CH}=\text{CH}_2$ ), 5.75 – 5.60 (m, 1H,  $\text{CH}_2\text{CH}=\text{CH}_2$ ), 5.32 – 5.23 (m, 1H,  $\text{NCH}_2\text{CH}=\text{CH}_2$ ), 5.23 – 5.16 (m, 1H,  $\text{NCH}_2\text{CH}=\text{CH}_2$ ), 5.02 – 4.87 (m, 2H,  $\text{CH}_2\text{CH}=\text{CH}_2$ ), 4.76 – 4.66 (m, 1H, CH (HO)), 4.46 (br. s, 1H, OH), 3.92 – 3.82 (m, 1H,  $\text{NCH}_2\text{CH}=\text{CH}_2$ ), 3.77 – 3.67 (m, 1H,  $\text{NCH}_2\text{CH}=\text{CH}_2$ ), 3.34 – 3.24 (m, 1H, CH(Me)), 2.22 – 2.02 (m, 2H,  $\text{CH}_2$ ), 1.90 (m, 2H,  $\text{CH}_2$ ), 1.78 – 1.50 (m, 2H,  $\text{CH}_2$ );  $^{13}\text{C}$  NMR (75 MHz,  $\text{CDCl}_3$ )  $\delta$  146.3, 138.1, 136.1, 135.8, 127.62, 127.59, 122.9,

121.3, 117.9, 116.8, 74.8, 58.2, 55.5, 33.2, 27.7, 26.0; HRMS (ESI-TOF): calcd. for  $C_{16}H_{22}NO$   $[M + H]^+$  244.1696; found 244.1695.

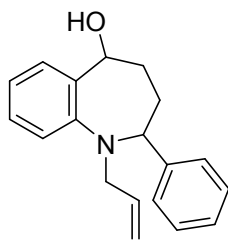

**1-Allyl-2-phenyl-2,3,4,5-tetrahydro-1H-benzo[b]azepin-5-ol (2f, syn)**

Colourless oil (273 mg, 98%);  $^1H$  NMR (300 MHz,  $CDCl_3$ )  $\delta$  7.43 (d,  $J = 6.9$  Hz, 1H, phenyl-H), 7.38 – 7.19 (m, 4H, phenyl-H), 7.18 – 7.06 (m, 3H, phenyl-H), 6.95 (d,  $J = 7.8$  Hz, 1H, phenyl-H), 5.86 – 5.62 (m, 1H,  $CH_2CH=CH_2$ ), 5.36 (t,  $J = 8.1$  Hz, 1H, CH (HO)), 5.14 – 4.95 (m, 2H,  $CH_2CH=CH_2$ ), 4.22 (dd,  $J = 10.2, 3.6$  Hz, 1H, CH(Ph)), 3.72 – 3.55 (m, 1H,  $CH_2CH=CH_2$ ), 3.48 – 3.35 (m, 1H,  $CH_2CH=CH_2$ ), 2.61 – 2.19 (m, 2H, OH and  $CH_2$ ), 1.85 – 1.47 (m, 3H,  $CH_2$ );  $^{13}C$  NMR (75 MHz,  $CDCl_3$ )  $\delta$  144.7, 144.3, 138.7, 135.7, 128.3, 127.24, 127.15, 126.9, 123.4, 122.7, 121.9, 116.9, 69.8, 63.9, 54.0, 32.7, 32.4; HRMS (ESI-TOF): calcd. for  $C_{19}H_{22}NO$   $[M + H]^+$  280.1696; found 280.1699.

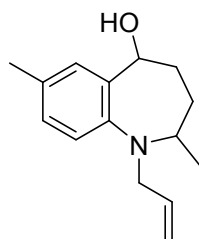

**1-Allyl-2,7-dimethyl-2,3,4,5-tetrahydro-1H-benzo[b]azepin-5-ol (2g, syn/anti = 88/12)**

Colourless oil (210 mg, 91%);  $^1H$  NMR (300 MHz,  $CDCl_3$ )  $\delta$  7.21 (br. s, 1H, phenyl-

H), 7.05 – 6.95 (m, 1H, phenyl-H), 6.91 (d,  $J = 2.1$  Hz, 0.2H, phenyl-H), 6.88 – 6.75 (m, 1H, phenyl-H), 5.98 – 5.70 (m, 1H,  $\text{CH}_2\text{CH}=\text{CH}_2$ ), 5.34 – 5.16 (m, 1.1H,  $\text{CH}_2\text{CH}=\text{CH}_2$ ), 5.16 – 4.94 (m, 1H,  $\text{CH}_2\text{CH}=\text{CH}_2$ ), 4.98 (dd,  $J = 7.8, 4.8$  Hz, 1H,  $\text{CH}(\text{HO})$ ), 4.64 (t,  $J = 4.5$  Hz, 0.2H,  $\text{CH}(\text{HO})$ ), 3.90 – 3.50 (m, 2.3H,  $\text{CH}_2\text{CH}=\text{CH}_2$ ), 3.42 – 3.33 (m, 0.17H,  $\text{CH}(\text{CH}_3)$ ), 3.33 – 3.18 (m, 1H,  $\text{CH}(\text{CH}_3)$ ), 2.69 (br. s, 1H, OH), 2.32 (s, 3H,  $\text{PhCH}_3$ ), 2.28 (s, 0.37H,  $\text{PhCH}_3$ ), 2.10 – 1.85 (m, 1.6H,  $\text{CH}_2$ ), 1.85 – 1.55 (m, 2.5H,  $\text{CH}_2$ ), 1.53 – 1.26 (m, 1.6H,  $\text{CH}_2$ ), 0.92 – 0.72 (m, 3.8H,  $\text{CH}_3$ );  $^{13}\text{C}$  NMR (75 MHz,  $\text{CDCl}_3$ )  $\delta$  142.4, 139.0, 136.8, 135.9, 131.9, 128.1, 127.9, 127.2, 124.4, 121.3, 121.0, 117.5, 116.6, 74.5, 71.5, 54.7, 54.6, 53.6, 53.1, 32.6, 30.8, 30.1, 28.8, 20.9, 20.6, 15.1, 13.8; HRMS (ESI-TOF): calcd. for  $\text{C}_{15}\text{H}_{22}\text{NO}$   $[\text{M} + \text{H}]^+$  232.1696; found 232.1700.

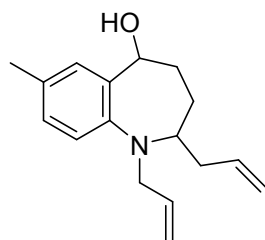

**1,2-Diallyl-7-methyl-2,3,4,5-tetrahydro-1H-benzo[b]azepin-5-ol (2h, anti)**

Colourless oil (231 mg, 90%);  $^1\text{H}$  NMR (300 MHz,  $\text{CDCl}_3$ )  $\delta$  7.09 – 6.91 (m, 2H, phenyl-H), 6.88 – 6.80 (m, 1H, phenyl-H), 5.98 – 5.78 (m, 1H,  $\text{NCH}_2\text{CH}=\text{CH}_2$ ), 5.76 – 5.56 (m, 1H,  $\text{CH}_2\text{CH}=\text{CH}_2$ ), 5.33 – 5.12 (m, 2H,  $\text{NCH}_2\text{CH}=\text{CH}_2$ ), 5.05 – 4.85 (m, 2H,  $\text{CH}_2\text{CH}=\text{CH}_2$ ), 4.66 (br. s, 1H,  $\text{CH}(\text{HO})$ ), 4.51 (br. s, 1H, OH), 3.85 (ddt,  $J = 14.1, 4.8, 1.8$  Hz, 1H,  $\text{CH}_2\text{CH}=\text{CH}_2$ ), 3.69 (ddt,  $J = 14.1, 7.5, 0.9$  Hz, 1H,  $\text{NCH}_2\text{CH}=\text{CH}_2$ ), 3.34 – 3.16 (m, 1H,  $\text{CH}(\text{Allyl})$ ), 2.28 (s, 3H,  $\text{CH}_3$ ), 2.18 – 2.01 (m, 2H,  $\text{CH}_2$ ), 2.01 – 1.78 (m, 2H,  $\text{CH}_2$ ), 1.78 – 1.51 (m, 2H,  $\text{CH}_2$ );  $^{13}\text{C}$  NMR (75 MHz,

CDCl<sub>3</sub>)  $\delta$  143.6, 138.0, 136.2, 136.0, 132.4, 128.5, 128.0, 121.2, 117.7, 116.8, 74.8, 58.1, 55.6, 33.0, 27.9, 26.1, 20.6; MS (ESI)  $m/z$  258.0 [M + H]<sup>+</sup>. HRMS (ESI-TOF): calcd. for C<sub>17</sub>H<sub>24</sub>NO [M + H]<sup>+</sup> 258.1852; found 258.1861.

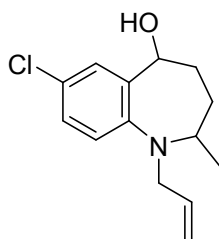

**1-Allyl-7-chloro-2-methyl-2,3,4,5-tetrahydro-1H-benzo[*b*]azepin-5-ol (2i, syn/anti = 67/33)**

Colourless oil (231 mg, 92%); <sup>1</sup>H NMR (300 MHz, CDCl<sub>3</sub>)  $\delta$  7.44 (d,  $J$  = 2.1 Hz, 0.7H, phenyl-H), 7.17 – 7.10 (m, 1.6H, phenyl-H), 6.94 – 6.75 (m, 1.3H, phenyl-H), 5.95 – 5.70 (m, 1.1H, CH<sub>2</sub>CH=CH<sub>2</sub>), 5.32 – 5.07 (m, 2.9H, CH<sub>2</sub>CH=CH<sub>2</sub>), 4.96 (dd,  $J$  = 8.7, 4.5 Hz, 1H, CH (HO)), 4.68 (br. s, 0.4H, CH (HO)), 4.47 (br. s, 0.4 H, OH), 3.87 – 3.71 (m, 1.5H, CH<sub>2</sub>CH=CH<sub>2</sub>), 3.70 – 3.55 (m, 1.5H, CH<sub>2</sub>CH=CH<sub>2</sub>), 3.44 – 3.24 (m, 1.4H, CH(CH<sub>3</sub>)), 2.29 (br. s, 0.7H, OH), 2.16 – 1.91 (m, 1.5H, CH<sub>2</sub>), 1.92 – 1.74 (m, 1.6H, CH<sub>2</sub>), 1.73 – 1.53 (m, 1.3H, CH<sub>2</sub>), 1.53 – 1.29 (m, 1.5H, CH<sub>2</sub>), 0.83 (d,  $J$  = 6.6 Hz, 1.6H, CH<sub>3</sub>), 0.76 (d,  $J$  = 6.6 Hz, 3H, CH<sub>3</sub>); <sup>13</sup>C NMR (75 MHz, CDCl<sub>3</sub>)  $\delta$  144.5, 143.5, 141.3, 139.7, 136.3, 135.3, 127.9, 127.3, 127.1, 126.5, 123.9, 122.4, 122.3, 118.0, 117.0, 73.5, 70.8, 55.0, 54.6, 53.8, 52.7, 32.6, 30.5, 29.5, 28.2, 14.8, 14.3; MS (ESI)  $m/z$  252.4 [M + H]<sup>+</sup>. HRMS (ESI-TOF): calcd. for C<sub>14</sub>H<sub>19</sub>ClNO [M + H]<sup>+</sup> 252.1150; found 252.1159.

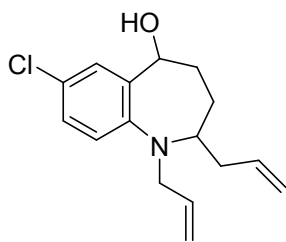

**1,2-Diallyl-7-chloro-2,3,4,5-tetrahydro-1H-benzo[b]azepin-5-ol (2j, anti)**

Colourless oil (252 mg, 91%);  $^1\text{H}$  NMR (300 MHz,  $\text{CDCl}_3$ )  $\delta$  7.17 – 7.09 (m, 2H, phenyl-H), 6.92 – 6.82 (m, 1H, phenyl-H), 5.90 – 5.76 (m, 1H,  $\text{NCH}_2\text{CH}=\text{CH}_2$ ), 5.75 – 5.55 (m, 1H,  $\text{CH}_2\text{CH}=\text{CH}_2$ ), 5.32 – 5.14 (m, 1H,  $\text{NCH}_2\text{CH}=\text{CH}_2$ ), 5.08 – 4.87 (m, 1H,  $\text{CH}_2\text{CH}=\text{CH}_2$ ), 4.69 (br. s, 1H, CH (HO)), 4.20 (br. s, 1H, OH), 3.83 (ddt,  $J$  = 14.1, 4.8, 1.5 Hz, 1H,  $\text{NCH}_2\text{CH}=\text{CH}_2$ ), 3.76 – 3.65 (m, 1H,  $\text{NCH}_2\text{CH}=\text{CH}_2$ ), 3.32 – 3.22 (m, 1H, CH(Allyl)), 2.22 – 1.98 (m, 2H,  $\text{CH}_2$ ), 1.95 – 1.71 (m, 3H,  $\text{CH}_2$  and  $\text{CH}_2\text{CH}=\text{CH}_2$ ), 1.67 – 1.52 (m, 1H,  $\text{CH}_2$ );  $^{13}\text{C}$  NMR (75 MHz,  $\text{CDCl}_3$ )  $\delta$  144.8, 139.5, 135.7, 135.3, 127.8, 127.4, 127.3, 122.4, 118.2, 117.1, 73.8, 58.2, 55.5, 33.5, 27.4, 25.7; HRMS (ESI-TOF): calcd. for  $\text{C}_{16}\text{H}_{21}\text{ClNO}$   $[\text{M} + \text{H}]^+$  278.1306; found 278.1309.

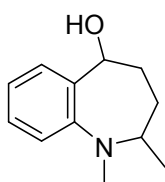

**1,2-Dimethyl-2,3,4,5-tetrahydro-1H-benzo[b]azepin-5-ol (2k, syn/anti = 68/32)**

Colourless oil (176 mg, 92%);  $^1\text{H}$  NMR (300 MHz,  $\text{CDCl}_3$ )  $\delta$  7.31 – 7.12 (m, 2.6H, phenyl-H), 7.07 – 6.90 (m, 2.4H, phenyl-H), 4.80 (t,  $J$  = 4.5 Hz, 0.8 H, CH (HO)), 4.77 (d,  $J$  = 6.3 Hz, 0.4H, CH (HO)) 4.12 (br. s, 1H, OH), 3.25 – 3.13 (m, 0.4H, CH( $\text{CH}_3$ )), 3.12 – 2.97 (m, 0.8H, CH( $\text{CH}_3$ )), 2.88 – 2.78 (m, 4.6H,  $\text{NCH}_3$ ), 2.12 – 1.64 (m, 4.8H,  $\text{CH}_2$ ), 1.62 – 1.31 (m, 1.5H,  $\text{CH}_2$ ), 1.05 (d,  $J$  = 6.6 Hz, 3H,  $\text{CH}_3$ ), 0.91



(d,  $J = 6.6$  Hz, 2H, CH<sub>3</sub>); <sup>13</sup>C NMR (75 MHz, CDCl<sub>3</sub>)  $\delta$  147.1, 146.8, 137.6, 137.4, 127.5, 127.3, 126.3, 124.7, 122.4, 122.2, 119.10, 119.09, 73.1, 72.6, 57.3, 39.9, 39.6, 31.6, 29.8, 29.2, 28.1, 16.1, 14.5; MS (ESI)  $m/z$  192.3 [M + H]<sup>+</sup>. HRMS (ESI-TOF): calcd. for C<sub>12</sub>H<sub>18</sub>NO [M + H]<sup>+</sup> 192.1383; found 192.1387.

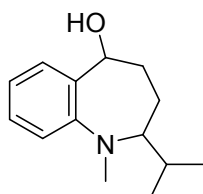

**2-Isopropyl-1-methyl-2,3,4,5-tetrahydro-1H-benzo[b]azepin-5-ol (2l, syn)**

Colourless oil (199 mg, 91%); <sup>1</sup>H NMR (300 MHz, CDCl<sub>3</sub>)  $\delta$  7.49 – 7.40 (m, 1H, phenyl-H), 7.18 (td,  $J = 7.5, 1.2$  Hz, 1H, phenyl-H), 7.06 – 6.91 (m, 2H, phenyl-H), 4.80 (dd,  $J = 9.9, 4.2$  Hz, 1H, CH(OH)), 3.01 (s, 3H, NCH<sub>3</sub>), 2.89 – 2.72 (m, 1H, CH(*i*-Pr)), 2.11 – 1.91 (m, 1H, CH<sub>2</sub>), 1.85 – 1.53 (m, 4H, CH and CH<sub>2</sub>), 0.85 (d,  $J = 6.6$  Hz, 3H, CH<sub>3</sub>), 0.71 (d,  $J = 6.9$  Hz, 3H, CH<sub>3</sub>); <sup>13</sup>C NMR (75 MHz, CDCl<sub>3</sub>)  $\delta$  147.1, 137.9, 126.8, 123.7, 121.2, 120.3, 71.8, 66.8, 41.6, 31.3, 29.3, 26.2, 20.6, 18.8; HRMS (ESI-TOF): calcd. for C<sub>14</sub>H<sub>22</sub>NO [M + H]<sup>+</sup> 220.1696; found 220.1706.

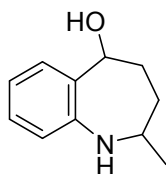

**2-Methyl-2,3,4,5-tetrahydro-1H-benzo[b]azepin-5-ol (2m, syn/anti = 91/9)**

White solid (142 mg, 80%); M.p. 103-105 °C; <sup>1</sup>H NMR (300 MHz, CDCl<sub>3</sub>)  $\delta$  7.45 – 7.38 (m, 0.1H, phenyl-H), 7.16 (dd,  $J = 7.5, 1.5$  Hz, 0.81H, phenyl-H), 7.10 (td,  $J =$

7.5, 1.5 Hz, 0.85H, phenyl-H), 7.00 – 6.87 (m, 0.85H, phenyl-H), 6.80 – 6.72 (m, 0.9H, phenyl-H), 4.80 (d,  $J = 8.7, 1.8$  Hz, 0.1H,  $CH(OH)$ ), 4.76 (d,  $J = 6.6$  Hz, 0.9H,  $CH(OH)$ ), 3.52 (br. s, 2H, OH and NH), 3.12 – 2.86 (m, 1.2H,  $CH(CH_3)$ ), 2.29 – 2.11 (m, 1H,  $CH_2$ ), 2.04 – 1.85 (m, 1.2H,  $CH_2$ ), 1.81 – 1.63 (m, 2.1H,  $CH_2$ ), 1.28 (d,  $J = 6.6$  Hz, 3H,  $CH_3$ ), 1.21 (d,  $J = 6.6$  Hz, 0.3H,  $CH_3$ );  $^{13}C$  NMR (75 MHz,  $CDCl_3$ )  $\delta$  146.9, 135.6, 128.9, 128.1, 127.2, 126.4, 122.0, 121.1, 120.8, 120.1, 74.5, 72.5, 54.6, 52.6, 34.5, 33.5, 32.4, 32.0, 23.9, 23.0; HRMS (ESI-TOF): calcd. for  $C_{11}H_{16}NO$  [ $M + H$ ] $^+$  178.1226; found 178.1232.

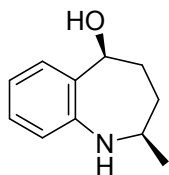

**2-Methyl-2,3,4,5-tetrahydro-1H-benzo[*b*]azepin-5-ol syn-2m**

$^1H$  NMR (300 MHz,  $CDCl_3$ )  $\delta$  7.16 (dd,  $J = 7.5, 1.5$  Hz, 1H, phenyl-H), 7.10 (td,  $J = 7.5, 1.5$  Hz, 1H, phenyl-H), 6.92 (td,  $J = 7.5, 1.2$  Hz, 1H, phenyl-H), 6.75 (dd,  $J = 7.5, 1.2$  Hz, 1H, phenyl-H), 4.76 (d,  $J = 6.6$  Hz, 1H,  $CH(OH)$ ), 3.56 (br. s, 2H, OH and NH), 3.08 – 2.81 (m, 1H,  $CH(CH_3)$ ), 2.34 – 2.07 (m, 1H,  $CH_2$ ), 2.06 – 1.85 (m, 1H,  $CH_2$ ), 1.82 – 1.59 (m, 2H,  $CH_2$ ), 1.28 (d,  $J = 6.6$  Hz, 3H,  $CH_3$ ); MS (ESI)  $m/z$  177.9 [ $M + H$ ] $^+$ .  $^{13}C$  NMR (75 MHz,  $CDCl_3$ )  $\delta$  146.9, 135.6, 128.9, 128.1, 122.1, 120.9, 74.6, 54.7, 32.4, 32.0, 24.0. HRMS (ESI-TOF): calcd. for  $C_{11}H_{16}NO$  [ $M + H$ ] $^+$  178.1226; found 178.1230. CCDC 1033762 contains the supplementary crystallographic data for this compound.

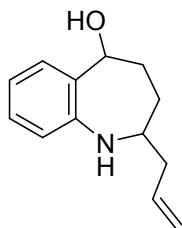

**2-Allyl-2,3,4,5-tetrahydro-1H-benzo[b]azepin-5-ol (2n, syn/anti = 75/25)**

Colourless oil (164 mg, 81%);  $^1\text{H NMR}$  (300 MHz,  $\text{CDCl}_3$ )  $\delta$  7.45 – 7.38 (m, 0.3H, phenyl-H), 7.16 (dd,  $J = 7.5, 1.5$  Hz, 1H, phenyl-H), 7.13 – 7.05 (m, 1.2H, phenyl-H), 6.99 – 6.87 (m, 1.2H, phenyl-H), 6.75 – 6.68 (m, 1.3H, phenyl-H), 5.94 – 5.70 (m, 1.1H,  $\text{CH}_2\text{CH}=\text{CH}_2$ ), 5.29 – 5.11 (m, 2.7H,  $\text{CH}_2\text{CH}=\text{CH}_2$ ), 4.80 (dd,  $J = 9.0, 1.8$  Hz, 0.3H,  $\text{CH}(\text{OH})$ ), 4.77 (d,  $J = 6.6$  Hz, 1H,  $\text{CH}(\text{OH})$ ), 3.63 (br.s, 1.4H, NH), 2.98 – 2.75 (m, 1.4H,  $\text{CH}(\text{Allyl})$ ), 2.42 – 2.31 (m, 1.3H,  $\text{CH}_2$ ), 2.31 – 2.14 (m, 2.6H,  $\text{CH}_2$ ), 2.14 – 1.87 (m, 2H,  $\text{CH}_2$ ), 1.84 – 1.56 (m, 2.6H,  $\text{CH}_2$ );  $^{13}\text{C NMR}$  (75 MHz,  $\text{CDCl}_3$ )  $\delta$  146.8, 146.2, 135.8, 135.43, 135.37, 135.2, 128.9, 128.1, 127.3, 126.4, 122.1, 121.2, 120.8, 120.1, 118.5, 118.2, 74.5, 72.4, 57.6, 55.8, 41.8, 41.1, 33.6, 33.0, 32.4, 30.6; MS (ESI)  $m/z$  203.9  $[\text{M} + \text{H}]^+$ . HRMS (ESI-TOF): calcd. for  $\text{C}_{13}\text{H}_{18}\text{NO}$   $[\text{M} + \text{H}]^+$  204.1383; found 204.1391.

**General Procedure for the Synthesis of 3**

To a solution of compound **2** (0.5 mmol) in dry  $\text{CH}_2\text{Cl}_2$  (10 mL) at  $-10$  °C was added Dess-Martin (0.6 mmol). The resulting solution was stirred at  $-10$  °C until compound **2** had been consumed, as monitored by TLC. The mixture was extracted with  $\text{CH}_2\text{Cl}_2$  ( $3 \times 15$  mL). The combined organic extracts were washed with brine, dried over anhydrous  $\text{Na}_2\text{SO}_4$  and concentrated *in vacuo*. Purification by flash column chromatography (petroleum ether/ethyl acetate = 10:1, v/v) afforded the desired

product **3**.

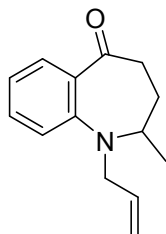

**1-Allyl-2-methyl-3,4-dihydro-1H-benzo[b]azepin-5(2H)-one (3a)**

Colourless oil (91 mg, 85%);  $^1\text{H}$  NMR (300 MHz,  $\text{CDCl}_3$ )  $\delta$  7.79 – 7.66 (m, 1H, phenyl-H), 7.47 – 7.30 (m, 1H, phenyl-H), 6.95 (dd,  $J = 11.1, 4.2$  Hz, 2H, phenyl-H), 5.98 – 5.70 (m, 1H,  $\text{CH}_2\text{CH}=\text{CH}_2$ ), 5.36 – 5.09 (m, 2H,  $\text{CH}_2\text{CH}=\text{CH}_2$ ), 4.03 – 3.83 (m, 2H,  $\text{CH}_2\text{CH}=\text{CH}_2$ ), 3.65 – 3.39 (m, 1H,  $\text{CH}(\text{CH}_3)$ ), 2.85 – 2.60 (m, 2H,  $\text{CH}_2$ ), 2.34 – 2.08 (m, 1H,  $\text{CH}_2$ ), 1.85 – 1.64 (m, 1H,  $\text{CH}_2$ ), 1.04 (d,  $J = 6.3$  Hz, 3H,  $\text{CH}_3$ );  $^{13}\text{C}$  NMR (75 MHz,  $\text{CDCl}_3$ )  $\delta$  204.2, 150.0, 136.0, 132.6, 131.9, 129.3, 121.0, 120.8, 117.1, 56.4, 52.5, 40.3, 34.4, 16.4; HRMS (ESI-TOF): calcd. for  $\text{C}_{14}\text{H}_{18}\text{NO}$   $[\text{M} + \text{H}]^+$  216.1383; found 216.1376.

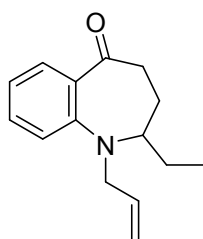

**1-Allyl-2-ethyl-3,4-dihydro-1H-benzo[b]azepin-5(2H)-one (3b)**

Colourless oil (95 mg, 83%);  $^1\text{H}$  NMR (300 MHz,  $\text{CDCl}_3$ )  $\delta$  7.74 (dd,  $J = 7.8, 1.8$  Hz, 1H, phenyl-H), 7.42 – 7.30 (m, 1H, phenyl-H), 6.98 (d,  $J = 8.1$  Hz, 1H, phenyl-H), 6.91 (t,  $J = 7.5$  Hz, 1H, phenyl-H), 6.03–5.77 (m, 1H,  $\text{CH}_2\text{CH}=\text{CH}_2$ ), 5.27 (dq,  $J = 17.1, 1.5$  Hz, 1H,  $\text{CH}_2\text{CH}=\text{CH}_2$ ), 5.18 (dq,  $J = 10.2, 1.5$  Hz, 1H,  $\text{CH}_2\text{CH}=\text{CH}_2$ ), 4.14 – 3.93 (m, 2H,  $\text{CH}_2\text{CH}=\text{CH}_2$ ), 3.38 – 3.22 m, 1H), 2.82 – 2.66 (m, 2H), 2.49 – 2.27 (m,

1H), 1.94 – 1.61 (m, 2H), 1.39 – 1.19 (m, 1H), 0.79 (t,  $J = 7.5$  Hz, 3H);  $^{13}\text{C}$  NMR (75 MHz,  $\text{CDCl}_3$ )  $\delta$  203.8, 151.1, 136.1, 132.6, 130.5, 129.2, 120.1, 119.9, 117.3, 62.9, 53.0, 40.4, 33.4, 25.1, 11.1; HRMS (ESI-TOF): calcd. for  $\text{C}_{15}\text{H}_{20}\text{NO}$   $[\text{M} + \text{H}]^+$  230.1539; found 230.1552.

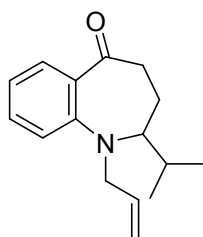

**1-Allyl-2-isopropyl-3,4-dihydro-1H-benzo[b]azepin-5(2H)-one (3c)**

Colourless oil (91 mg, 86%);  $^1\text{H}$  NMR (300 MHz,  $\text{CDCl}_3$ )  $\delta$  7.80 – 7.69 (m, 1H, phenyl-H), 7.38 – 7.29 (m, 1H, phenyl-H), 7.06 – 6.94 (m, 1H, phenyl-H), 6.91 – 6.80 (m, 1H, phenyl-H), 6.05 – 5.75 (m, 1H,  $\text{CH}_2\text{CH}=\text{CH}_2$ ), 5.35 – 5.11 (m, 2H,  $\text{CH}_2\text{CH}=\text{CH}_2$ ), 4.22 – 4.01 (m, 2H,  $\text{CH}_2\text{CH}=\text{CH}_2$ ), 3.13 – 2.97 (m, 1H,  $\text{CH}(i\text{-Pr})$ ), 2.84 – 2.64 (m, 2H,  $\text{CH}_2$ ), 2.45 – 2.25 (m, 1H,  $\text{CH}_2$ ), 2.15 – 1.98 (m, 1H,  $\text{CH}_2$ ), 1.98 – 1.85 (m, 1H, CH), 0.82 (d,  $J = 6.6$  Hz, 3H,  $\text{CH}_3$ ), 0.78 (d,  $J = 6.6$  Hz, 3H,  $\text{CH}_3$ );  $^{13}\text{C}$  NMR (75 MHz,  $\text{CDCl}_3$ )  $\delta$  203.2, 152.3, 136.0, 132.6, 129.5, 129.2, 119.7, 119.4, 117.6, 76.6, 68.7, 53.6, 40.6, 31.9, 30.4, 20.8, 19.8; HRMS (ESI-TOF): calcd. for  $\text{C}_{16}\text{H}_{22}\text{NO}$   $[\text{M} + \text{H}]^+$  244.1696; found 244.1687.

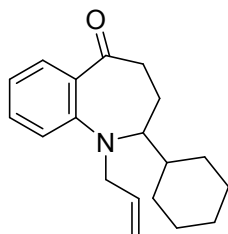

**1-Allyl-2-cyclohexyl-3,4-dihydro-1H-benzo[b]azepin-5(2H)-one (3d)**

Colourless oil (113 mg, 80%);  $^1\text{H}$  NMR (300 MHz,  $\text{CDCl}_3$ )  $\delta$  7.74 (dd,  $J = 7.8, 1.8$  Hz,

1H, phenyl-H), 7.38 – 7.28 (m, 1H, phenyl-H), 6.99 (d,  $J = 8.4$  Hz, 1H, phenyl-H), 6.85 (t,  $J = 7.5$  Hz, 1H, phenyl-H), 6.05 – 5.75 (m, 1H,  $\text{CH}_2\text{CH}=\text{CH}_2$ ), 5.40 – 5.10 (m, 2H,  $\text{CH}_2\text{CH}=\text{CH}_2$ ), 4.21 – 3.95 (m, 2H,  $\text{CH}_2\text{CH}=\text{CH}_2$ ), 3.18 – 3.01 (m, 1H,  $\text{CH}(\text{Cy})$ ), 2.86 – 2.63 (m, 2H,  $\text{CH}_2$ ), 2.45 – 2.23 (m, 1H,  $\text{CH}_2$ ), 2.19 – 1.97 (m, 1H,  $\text{CH}_2$ ), 1.74 – 1.47 (m, 6H,  $\text{CH}_2$ ), 1.30 – 0.96 (m, 3H,  $\text{CH}_2$  and  $\text{CH}$ ), 0.95 – 0.70 (m, 2H,  $\text{CH}_2$ );  $^{13}\text{C}$  NMR (75 MHz,  $\text{CDCl}_3$ )  $\delta$  203.2, 152.7, 136.1, 132.5, 129.4, 129.2, 119.5, 119.3, 117.5, 67.8, 53.2, 40.6, 40.1, 32.1, 31.1, 30.2, 26.2, 26.0, 25.9; HRMS (ESI-TOF): calcd. for  $\text{C}_{19}\text{H}_{26}\text{NO}$   $[\text{M} + \text{H}]^+$  284.2009; found 284.2002.

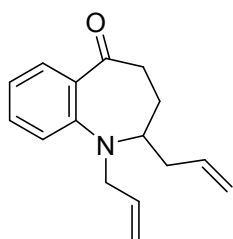

**1,2-Diallyl-3,4-dihydro-1H-benzo[b]azepin-5(2H)-one (3e)**

Light brown oil (90 mg, 75%);  $^1\text{H}$  NMR (300 MHz,  $\text{CDCl}_3$ )  $\delta$  7.75 (dd,  $J = 7.8, 1.8$  Hz, 1H, phenyl-H), 7.45 – 7.30 (m, 1H, phenyl-H), 7.07 – 6.88 (m, 2H, phenyl-H), 5.98 – 5.76 (m, 1H,  $\text{NCH}_2\text{CH}=\text{CH}_2$ ), 5.75 – 5.54 (m, 1H,  $\text{CH}_2\text{CH}=\text{CH}_2$ ), 5.40 – 5.12 (m, 2H,  $\text{NCH}_2\text{CH}=\text{CH}_2$ ), 5.04 – 4.88 (m, 2H,  $\text{CH}_2\text{CH}=\text{CH}_2$ ), 4.14 – 3.90 (m, 2H,  $\text{NCH}_2\text{CH}=\text{CH}_2$ ), 3.56 – 3.34 (m, 1H,  $\text{CH}(\text{Allyl})$ ), 2.80 – 2.66 (m, 2H,  $\text{CH}_2$ ), 2.55 – 2.40 (m, 1H,  $\text{CH}_2\text{CH}=\text{CH}_2$ ), 2.39 – 2.21 (m, 1H,  $\text{CH}_2$ ), 2.05 – 1.88 (m, 1H,  $\text{CH}_2\text{CH}=\text{CH}_2$ ), 1.85 – 1.66 (m, 1H,  $\text{CH}_2$ );  $^{13}\text{C}$  NMR (75 MHz,  $\text{CDCl}_3$ )  $\delta$  203.8, 150.2, 135.9, 135.0, 132.8, 131.5, 129.3, 121.0, 120.9, 117.5, 117.1, 60.7, 53.4, 40.3, 36.3, 32.4; HRMS (ESI-TOF): calcd. for  $\text{C}_{16}\text{H}_{20}\text{NO}$   $[\text{M} + \text{H}]^+$  242.1539; found 242.1537.

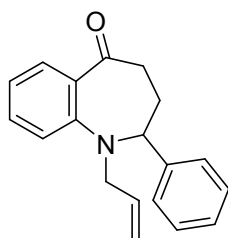

**1-Allyl-2-phenyl-3,4-dihydro-1H-benzo[b]azepin-5(2H)-one (3f)**

Colourless oil (122 mg, 88%);  $^1\text{H NMR}$  (300 MHz,  $\text{CDCl}_3$ )  $\delta$  7.79 (dd,  $J = 7.8, 1.5$  Hz, 1H, phenyl-H), 7.40 (ddd,  $J = 8.1, 7.2, 1.8$  Hz, 1H, phenyl-H), 7.31 – 7.22 (m, 3H, phenyl-H), 7.07 (ddd,  $J = 7.8, 7.2, 1.2$  Hz, 1H, phenyl-H), 7.03 – 6.94 (m, 2H, phenyl-H), 6.75 (dd,  $J = 8.1, 0.9$  Hz, 1H, phenyl-H), 5.92 – 5.63 (m, 1H,  $\text{CH}_2\text{CH}=\text{CH}_2$ ), 5.23 – 5.08 (m, 2H,  $\text{CH}_2\text{CH}=\text{CH}_2$ ), 4.36 (dd,  $J = 11.7, 6.0$  Hz, 1H,  $\text{CH}(\text{Ph})$ ), 3.80 – 3.35 (m, 2H,  $\text{CH}_2\text{CH}=\text{CH}_2$ ), 2.94 – 2.69 (m, 2H,  $\text{CH}_2$ ), 2.44 – 2.26 (m, 1H,  $\text{CH}_2$ ), 2.25 – 2.02 (m, 1H,  $\text{CH}_2$ );  $^{13}\text{C NMR}$  (75 MHz,  $\text{CDCl}_3$ )  $\delta$  204.8, 149.0, 140.4, 135.5, 133.12, 133.08, 129.6, 128.2, 127.8, 127.4, 122.7, 122.1, 117.8, 65.3, 53.7, 40.0, 31.1; HRMS (ESI-TOF): calcd. for  $\text{C}_{19}\text{H}_{20}\text{NO}$   $[\text{M} + \text{H}]^+$  278.1539; found 278.1545.

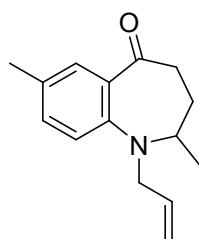

**1-Allyl-2,7-dimethyl-3,4-dihydro-1H-benzo[b]azepin-5(2H)-one (3g)**

Colourless oil (101 mg, 88%);  $^1\text{H NMR}$  (300 MHz,  $\text{CDCl}_3$ )  $\delta$  7.52 (d,  $J = 2.1$  Hz, 1H, phenyl-H), 7.20 (ddd,  $J = 8.1, 2.4, 0.6$  Hz, 1H, phenyl-H), 6.87 (d,  $J = 8.4$  Hz, 1H, phenyl-H), 5.95 – 5.69 (m, 1H,  $\text{CH}_2\text{CH}=\text{CH}_2$ ), 5.35 – 5.05 (m, 2H,  $\text{CH}_2\text{CH}=\text{CH}_2$ ), 4.04 – 3.76 (m, 2H,  $\text{CH}_2\text{CH}=\text{CH}_2$ ), 3.56 – 3.35 (m, 1H,  $\text{CH}(\text{CH}_3)$ ), 2.78 – 2.62 (m, 2H,  $\text{CH}_2$ ), 2.29 (s, 3H,  $\text{PhCH}_3$ ), 2.23 – 2.06 (m, 1H,  $\text{CH}_2$ ), 1.71 – 1.52 (m, 1H,  $\text{CH}_2$ ), 1.00

(d,  $J = 6.3$  Hz, 3H, CH<sub>3</sub>); <sup>13</sup>C NMR (75 MHz, CDCl<sub>3</sub>)  $\delta$  204.9, 147.0, 136.1, 133.6, 132.4, 130.9, 129.4, 121.5, 117.0, 56.0, 52.9, 40.3, 33.5, 20.3, 15.7; HRMS (ESI-TOF): calcd. for C<sub>15</sub>H<sub>20</sub>NO [M + H]<sup>+</sup> 230.1539; found 230.1544.

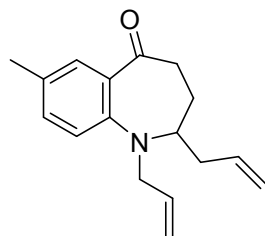

**1,2-Diallyl-7-methyl-3,4-dihydro-1H-benzo[b]azepin-5(2H)-one (3h)**

Colourless oil (97 mg, 76%); <sup>1</sup>H NMR (300 MHz, CDCl<sub>3</sub>)  $\delta$  7.55 (d,  $J = 2.4$  Hz, 1H, phenyl-H), 7.19 (ddd,  $J = 8.4, 2.4, 0.6$  Hz, 1H, phenyl-H), 6.88 (d,  $J = 8.4$  Hz, 1H, phenyl-H), 5.90 – 5.75 (m, 1H, NCH<sub>2</sub>CH=CH<sub>2</sub>), 5.74 – 5.57 (m, 1H, CH<sub>2</sub>CH=CH<sub>2</sub>), 5.34 – 5.10 (m, 2H, NCH<sub>2</sub>CH=CH<sub>2</sub>), 5.01 – 4.90 (m, 2H, CH<sub>2</sub>CH=CH<sub>2</sub>), 4.15 – 3.82 (m, 2H, NCH<sub>2</sub>CH=CH<sub>2</sub>), 3.48 – 3.31 (m, 1H, CH(Allyl)), 2.82 – 2.63 (m, 2H, CH<sub>2</sub>), 2.55 – 2.38 (m, 1H, CH<sub>2</sub>CH=CH<sub>2</sub>), 2.34 – 2.16 (m, 1H, CH<sub>2</sub>), 2.29 (s, 3H, CH<sub>3</sub>), 1.97 – 1.82 (m, 1H, CH<sub>2</sub>CH=CH<sub>2</sub>), 1.74 – 1.58 (m, 1H, CH<sub>2</sub>); <sup>13</sup>C NMR (75 MHz, CDCl<sub>3</sub>)  $\delta$  204.3, 147.3, 136.0, 135.1, 133.7, 132.0, 130.9, 129.4, 121.5, 117.3, 117.0, 60.4, 53.7, 40.3, 35.9, 31.6, 20.3; MS (ESI)  $m/z$  256.1 [M + H]<sup>+</sup>. HRMS (ESI-TOF): calcd. for C<sub>17</sub>H<sub>22</sub>NO [M + H]<sup>+</sup> 256.1696; found 256.1705.

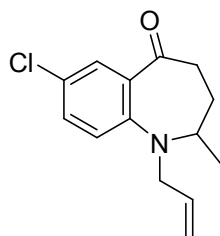

**1-Allyl-7-chloro-2-methyl-3,4-dihydro-1H-benzo[b]azepin-5(2H)-one (3i)**

White solid (148 mg, 84%); M.P. 56-58 °C; <sup>1</sup>H NMR (300 MHz, CDCl<sub>3</sub>)  $\delta$  7.68 (d,  $J$



= 2.7 Hz, 1H, phenyl-H), 7.30 (dd,  $J = 8.7, 2.7$  Hz, 1H, phenyl-H), 6.90 (d,  $J = 8.7$  Hz, 1H, phenyl-H), 5.90 – 5.71 (m, 1H,  $\text{CH}_2\text{CH}=\text{CH}_2$ ), 5.32 – 5.12 (m, 2H,  $\text{CH}_2\text{CH}=\text{CH}_2$ ), 4.03 – 3.81 (m, 2H,  $\text{CH}_2\text{CH}=\text{CH}_2$ ), 3.62 – 3.37 (m, 1H,  $\text{CH}(\text{CH}_3)$ ), 2.88 – 2.54 (m, 2H,  $\text{CH}_2$ ), 2.35 – 2.12 (m, 1H,  $\text{CH}_2$ ), 1.82 – 1.63 (m, 1H,  $\text{CH}_2$ ), 1.04 (d,  $J = 6.3$  Hz, 3H,  $\text{CH}_3$ );  $^{13}\text{C}$  NMR (75 MHz,  $\text{CDCl}_3$ )  $\delta$  202.8, 148.4, 135.4, 132.6, 132.4, 128.8, 126.3, 122.2, 117.5, 56.6, 52.4, 40.1, 34.2, 16.4; HRMS (ESI-TOF): calcd. for  $\text{C}_{14}\text{H}_{17}\text{ClNO}$   $[\text{M} + \text{H}]^+$  250.0993; found 250.0999.

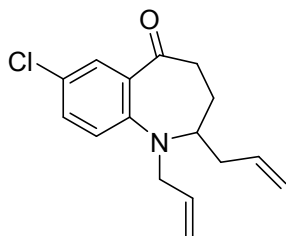

**1,2-Diallyl-7-chloro-3,4-dihydro-1H-benzo[b]azepin-5(2H)-one (3j)**

White solid (107 mg, 78%); M.P. 49-51 °C;  $^1\text{H}$  NMR (300 MHz,  $\text{CDCl}_3$ )  $\delta$  7.71 (d,  $J = 2.7$  Hz, 1H, phenyl-H), 7.30 (dd,  $J = 8.7, 2.7$  Hz, 1H, phenyl-H), 6.91 (d,  $J = 8.7$  Hz, 1H, phenyl-H), 5.94 – 5.74 (m, 1H,  $\text{NCH}_2\text{CH}=\text{CH}_2$ ), 5.73 – 5.53 (m, 1H,  $\text{CH}_2\text{CH}=\text{CH}_2$ ), 5.36 – 5.12 (m, 2H,  $\text{NCH}_2\text{CH}=\text{CH}_2$ ), 5.04 – 4.89 (m, 2H,  $\text{CH}_2\text{CH}=\text{CH}_2$ ), 4.12 – 4.86 (m, 2H,  $\text{NCH}_2\text{CH}=\text{CH}_2$ ), 3.56–3.35 (m, 1H,  $\text{CH}(\text{Allyl})$ ), 2.83 – 2.63 (m, 2H,  $\text{CH}_2$ ), 2.54 – 2.38 (m, 1H,  $\text{CH}_2\text{CH}=\text{CH}_2$ ), 2.38 – 2.21 (m, 1H,  $\text{CH}_2$ ), 2.06 – 1.88 (m, 1H,  $\text{CH}_2\text{CH}=\text{CH}_2$ ), 1.83 – 1.65 (m, 1H,  $\text{CH}_2$ );  $^{13}\text{C}$  NMR (75 MHz,  $\text{CDCl}_3$ )  $\delta$  202.3, 148.6, 135.3, 134.6, 132.5, 132.2, 128.8, 126.3, 122.3, 117.9, 117.4, 60.9, 53.5, 40.1, 36.3, 32.3; HRMS (ESI-TOF): calcd. for  $\text{C}_{16}\text{H}_{19}\text{ClNO}$   $[\text{M} + \text{H}]^+$  276.1150; found 276.1152.

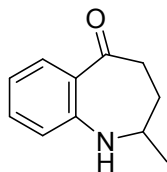

### 2-Methyl-3,4-dihydro-1H-benzo[b]azepin-5(2H)-one (3k)

Pale yellow oil (33 mg, 38%);  $^1\text{H}$  NMR (300 MHz,  $\text{CDCl}_3$ )  $\delta$  7.71 (dd,  $J = 7.8, 1.5$  Hz, 1H, phenyl-H), 7.27 – 7.19 (m, 1H, phenyl-H), 6.81 (ddd,  $J = 8.1, 7.2, 0.9$  Hz, 1H, phenyl-H), 6.73 (dd,  $J = 8.1, 0.6$  Hz, 1H, phenyl-H), 4.16 (br. s, 1H, NH), 3.35 – 3.12 (m, 1H,  $\text{CH}(\text{CH}_3)$ ), 3.11 – 2.92 (m, 1H,  $\text{CH}_2$ ), 2.60 (ddd,  $J = 11.4, 6.6, 2.1$  Hz, 1H,  $\text{CH}_2$ ), 2.27 – 2.09 (m, 1H,  $\text{CH}_2$ ), 2.04 – 1.86 (m, 1H,  $\text{CH}_2$ ), 1.33 (d,  $J = 6.3$  Hz, 3H,  $\text{CH}_3$ );  $^{13}\text{C}$  NMR (75 MHz,  $\text{CDCl}_3$ )  $\delta$  202.8, 152.3, 132.3, 129.1, 125.1, 118.6, 117.7, 64.0, 54.8, 40.9, 39.0, 21.9; HRMS (ESI-TOF): calcd. for  $\text{C}_{11}\text{H}_{14}\text{NO}$   $[\text{M} + \text{H}]^+$  176.1070; found 176.1077.

### Procedure for the synthesis of 4

To a solution of **3e** (121 mg, 0.5 mmol) in  $\text{CH}_2\text{Cl}_2$  (5 mL) was added Grubbs II catalyst (42.5 mg, 0.05 mmol) under an Ar atmosphere. The mixture was stirred at room temperature for 8 h. After compound **3e** had been consumed, the reaction mixture was cooled to room temperature. Water was added and the mixture was extracted with ethyl acetate ( $3 \times 15$  mL). The combined organic extracts were washed with brine, dried over anhydrous  $\text{Na}_2\text{SO}_4$  and concentrated *in vacuo*. Purification by flash column chromatography (petroleum ether/ethyl acetate = 10:1, v/v) afforded the desired product **4**.  $^1\text{H}$  NMR (300 MHz,  $\text{CDCl}_3$ )  $\delta$  7.69 (dd,  $J = 7.5, 1.8$  Hz, 1H, phenyl-H), 7.45 – 7.33 (m, 1H, phenyl-H), 7.05 (d,  $J = 8.4$  Hz, 1H, phenyl-H), 7.02 –

6.93 (m, 1H, phenyl-H), 6.03 – 5.82 (m, 2H, CH=CH), 4.11 – 3.99 (m, 1H, CH<sub>2</sub>), 3.84 – 3.72 (m, 1H, CH<sub>2</sub>), 3.60 – 3.44 (m, 1H, CH), 2.84 – 2.72 (m, 1H, CH<sub>2</sub>), 2.67 – 2.57 (m, 1H, CH<sub>2</sub>), 2.30 – 2.08 (m, 2H, CH<sub>2</sub>), 2.06 – 1.91 (m, 1H, CH<sub>2</sub>), 1.86 – 1.73 (m, 1H, CH<sub>2</sub>). <sup>13</sup>C NMR (75 MHz, CDCl<sub>3</sub>) δ 204.8, 150.3, 133.1, 132.0, 129.4, 125.8, 125.5, 121.4, 120.3, 57.0, 49.1, 39.4, 31.3, 29.6. HRMS (ESI-TOF): calcd. for C<sub>14</sub>H<sub>16</sub>NO [M + H]<sup>+</sup> 214.1226; found 214.1221.

# NMR Spectra

## NMR spectrum of Compound S2a

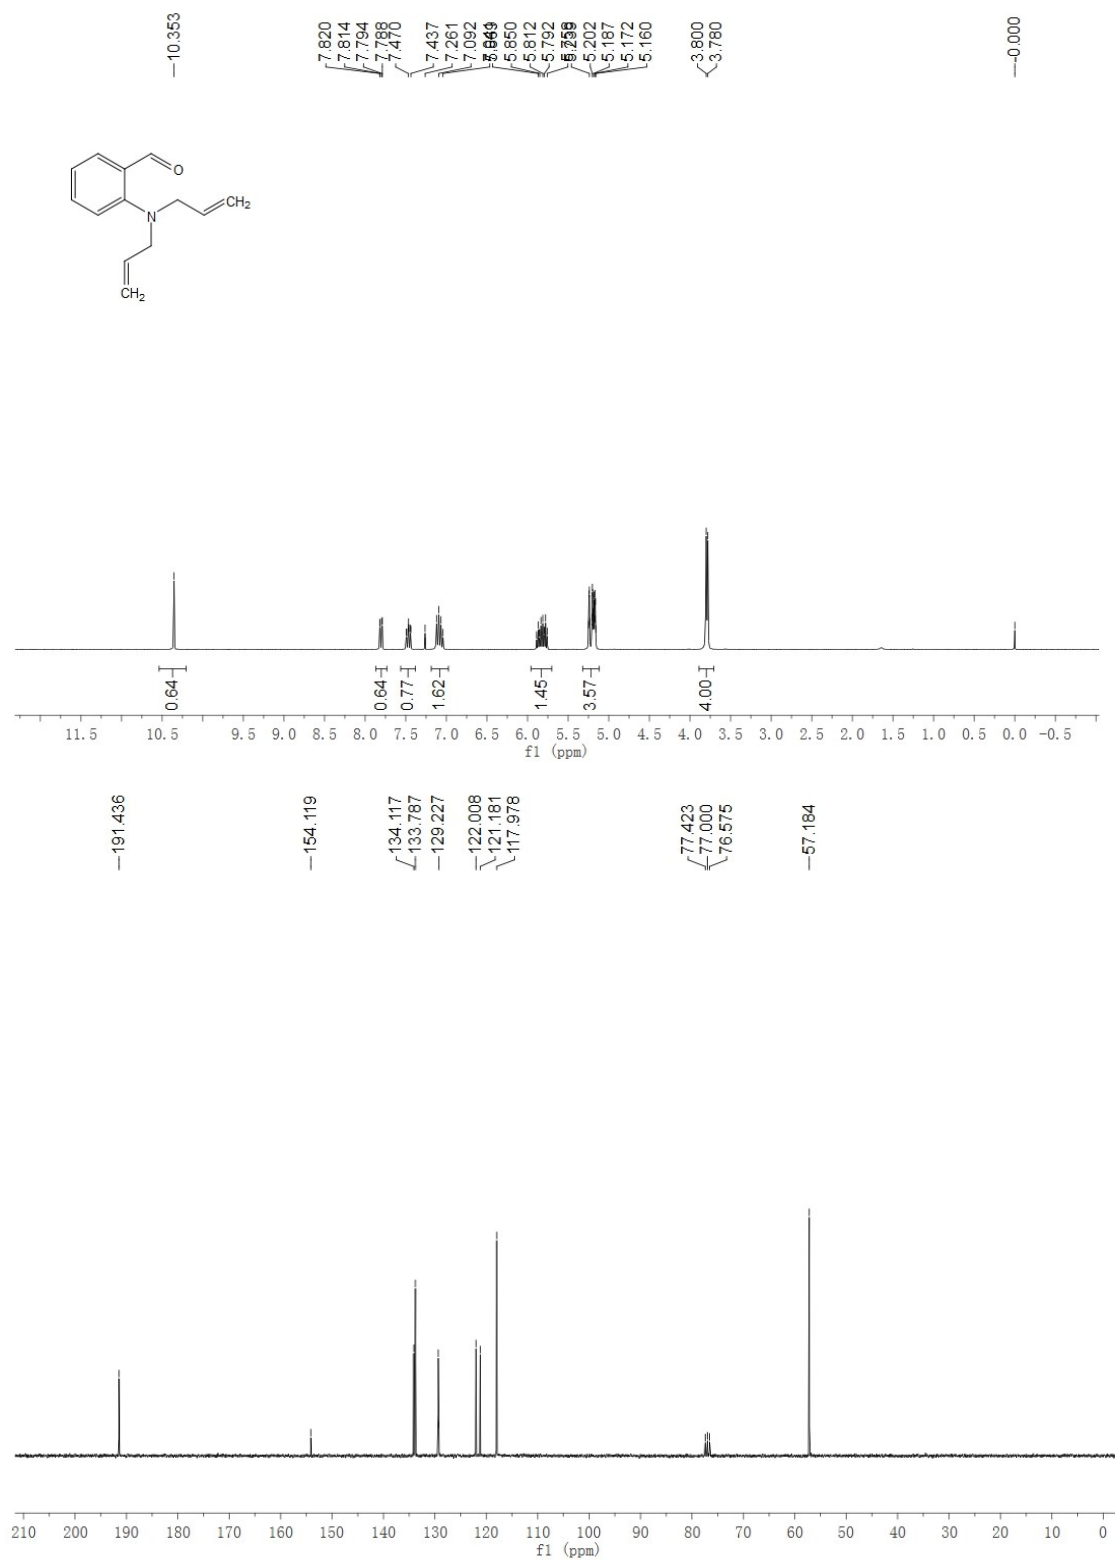

# NMR spectrum of Compound S2b

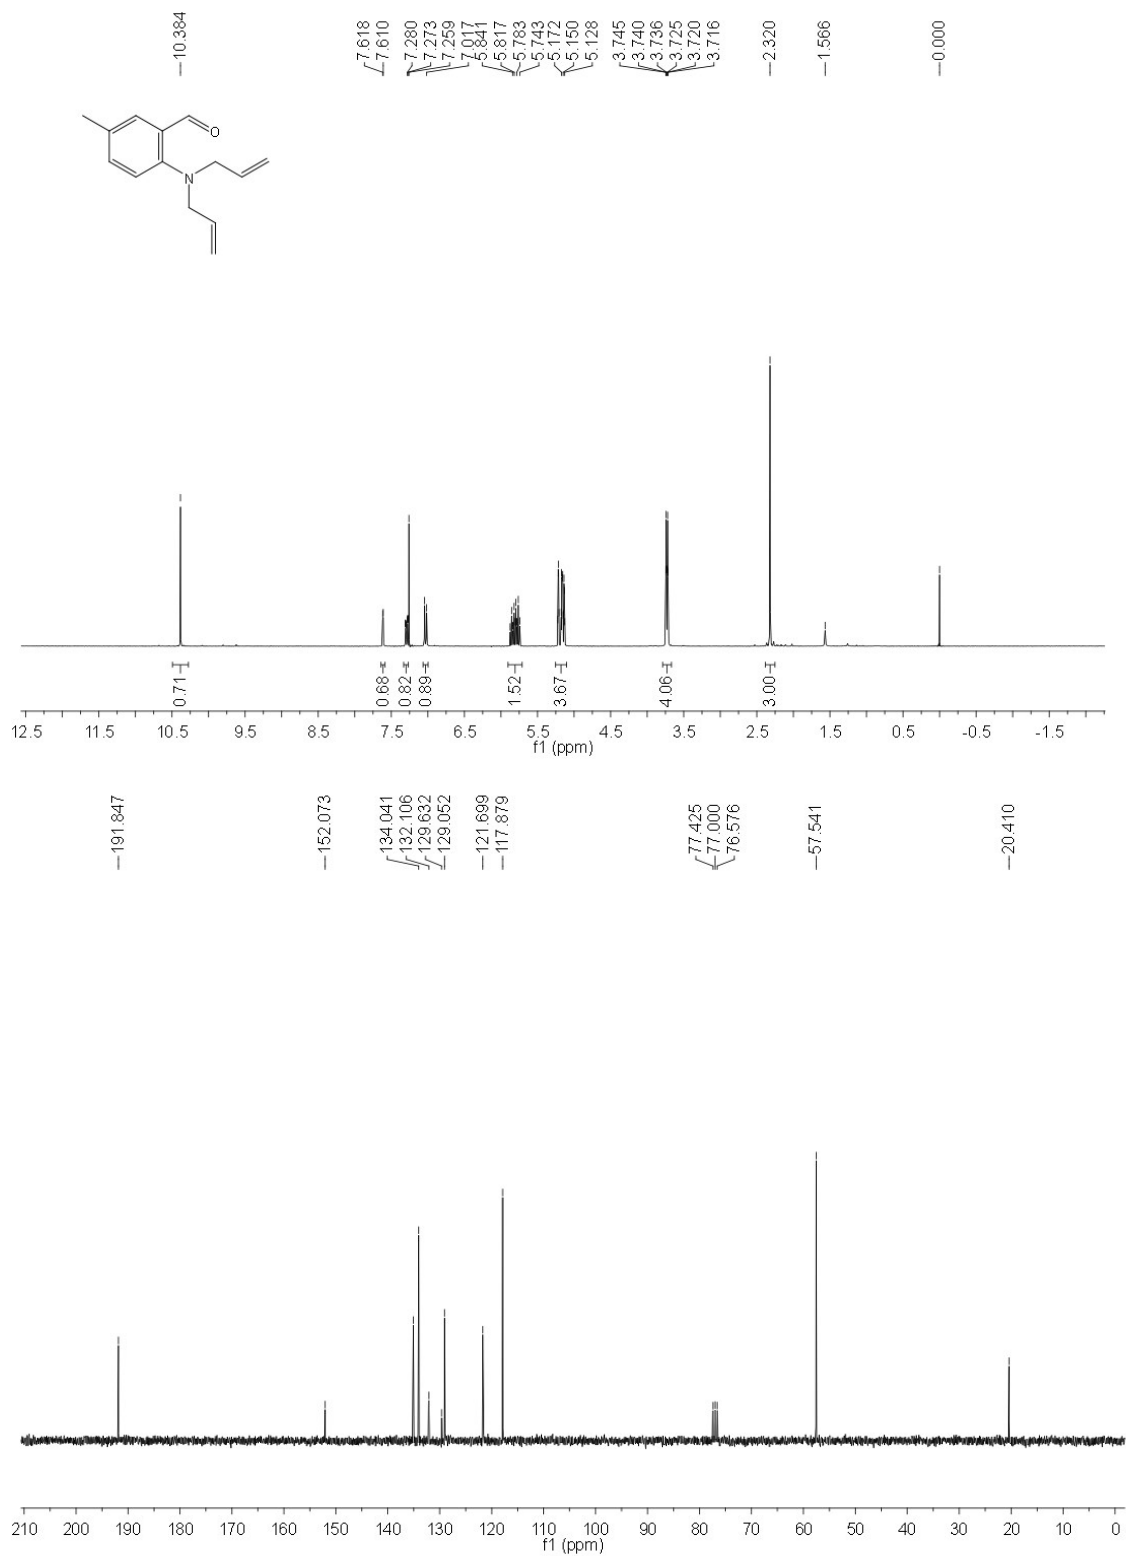

# NMR spectrum of Compound S2c

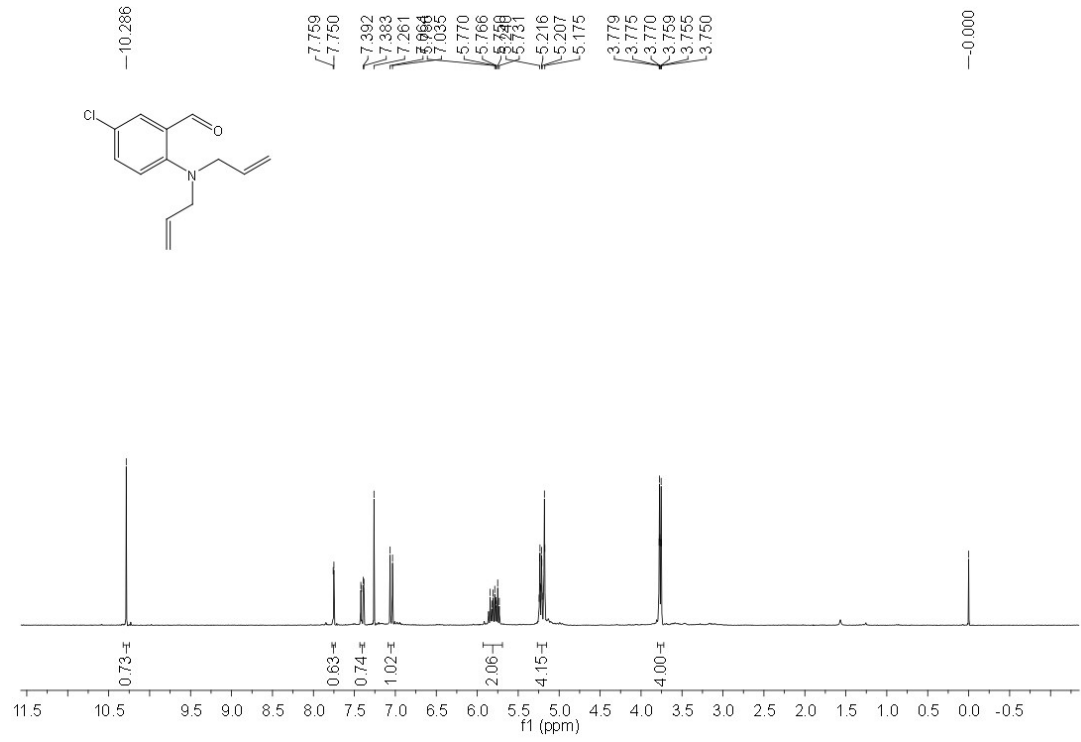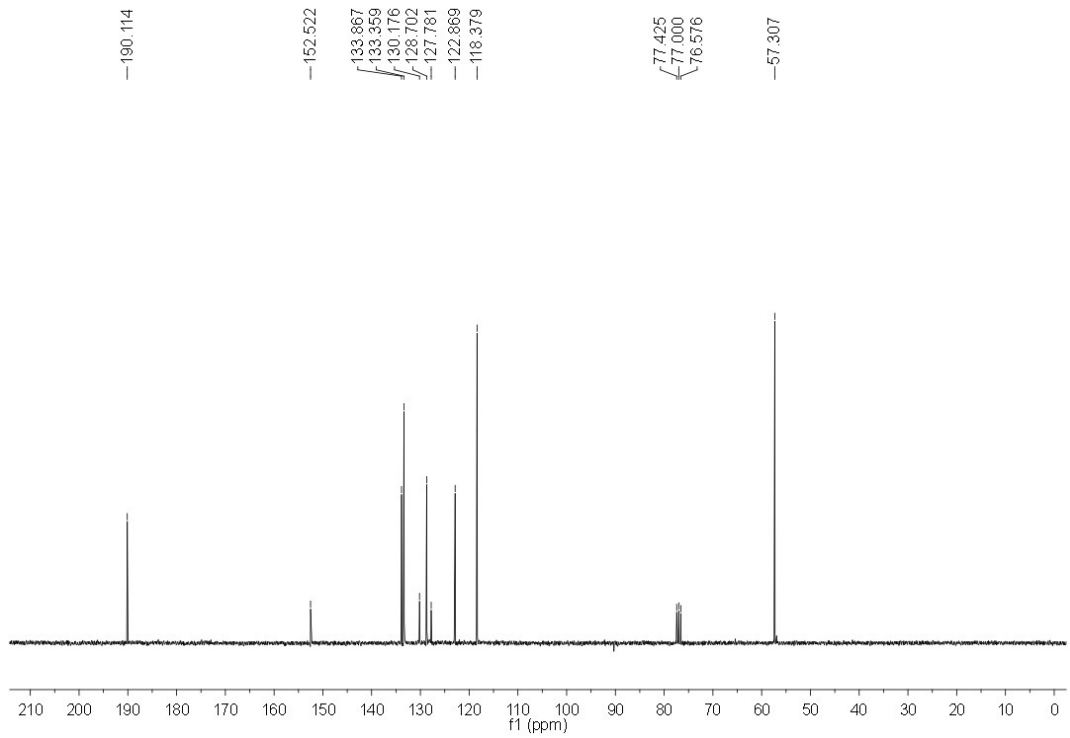

# NMR spectrum of Compound S2d

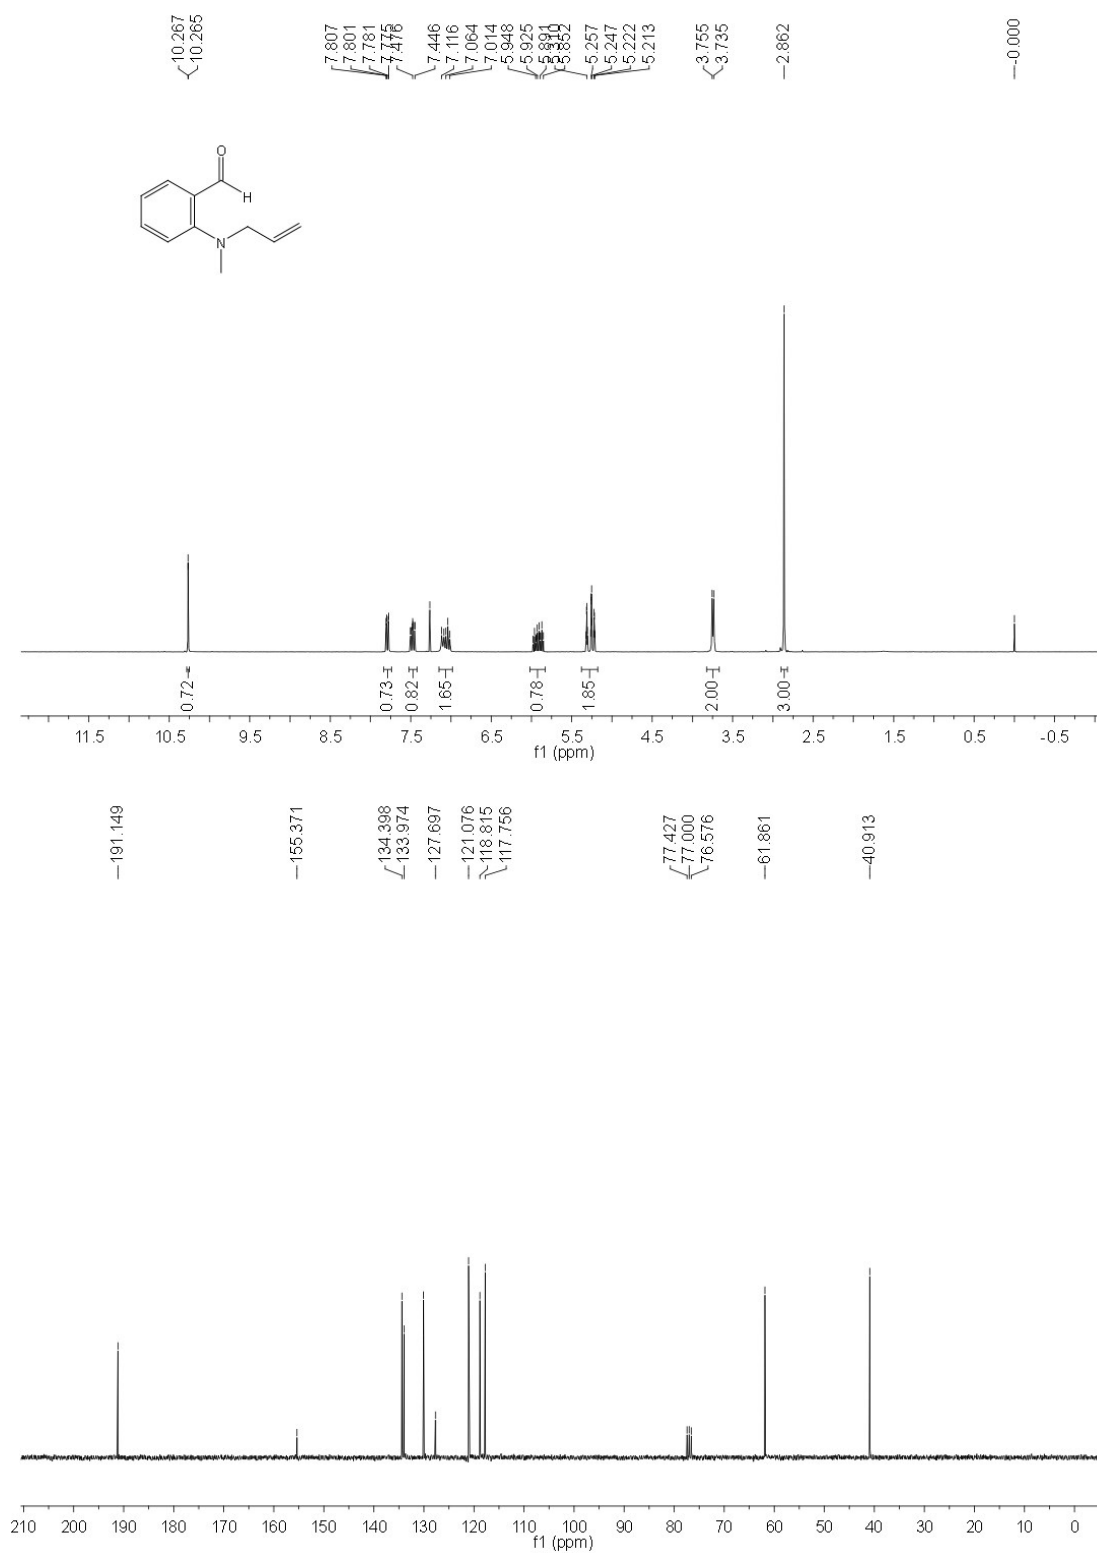

# NMR spectrum of Compound 1a

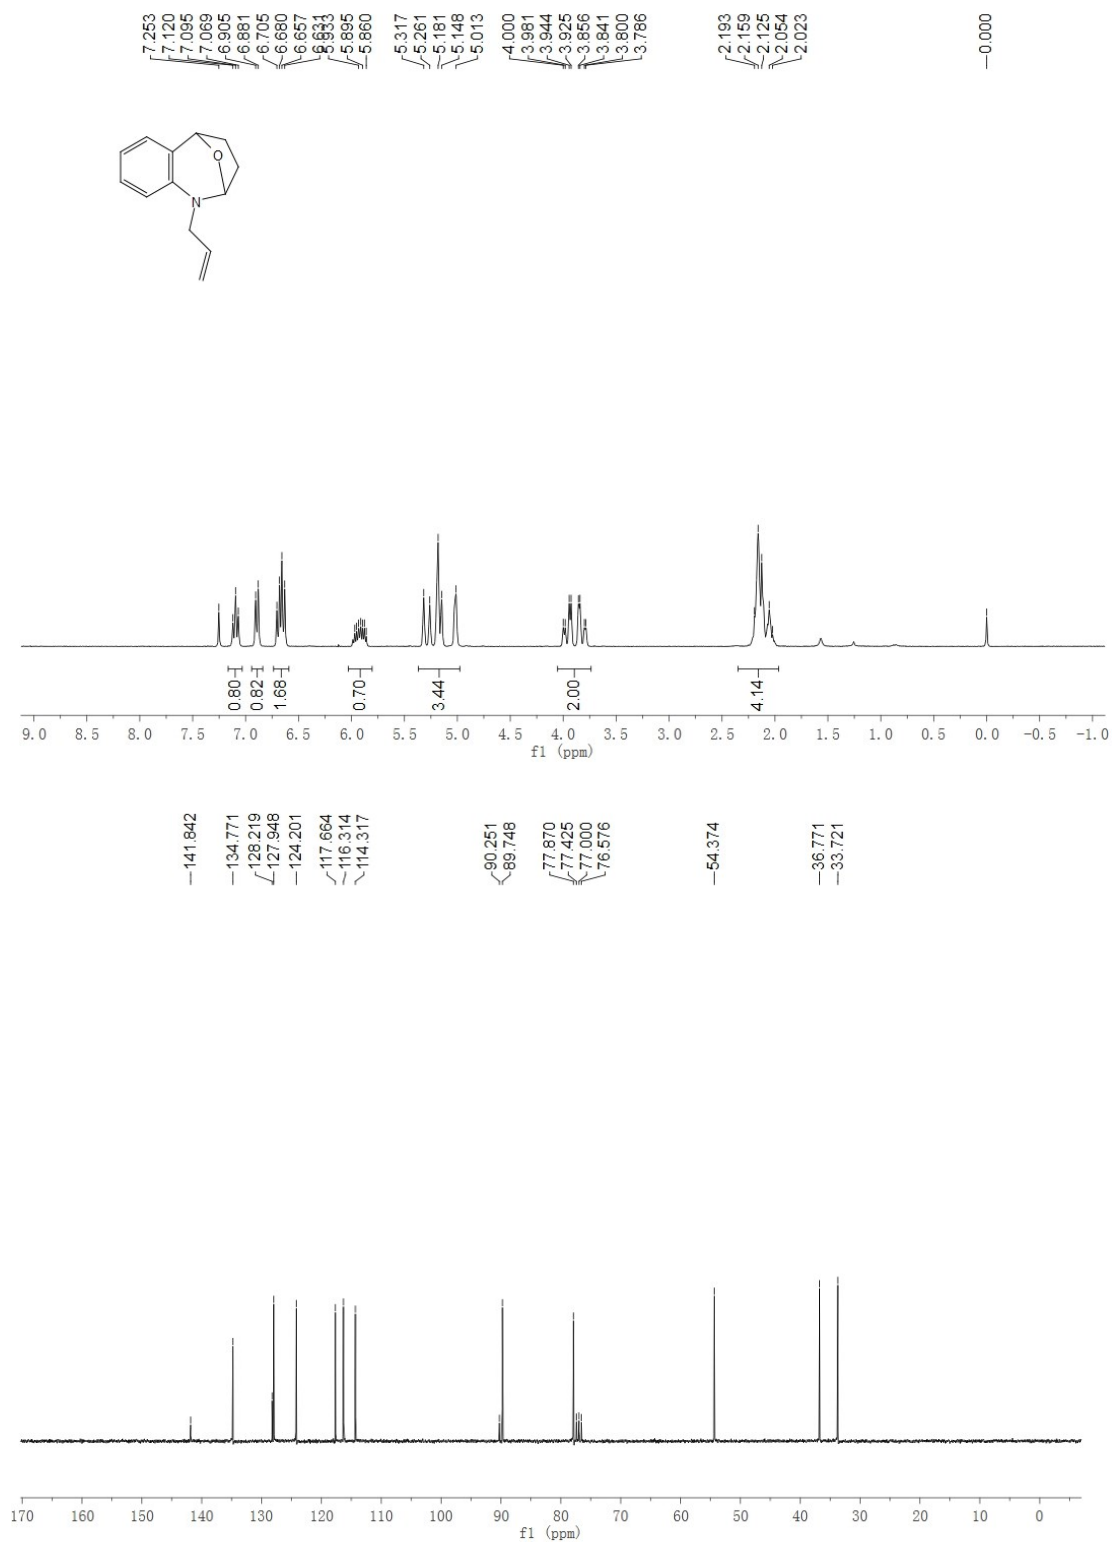



NMR spectrum of Compound **1b**

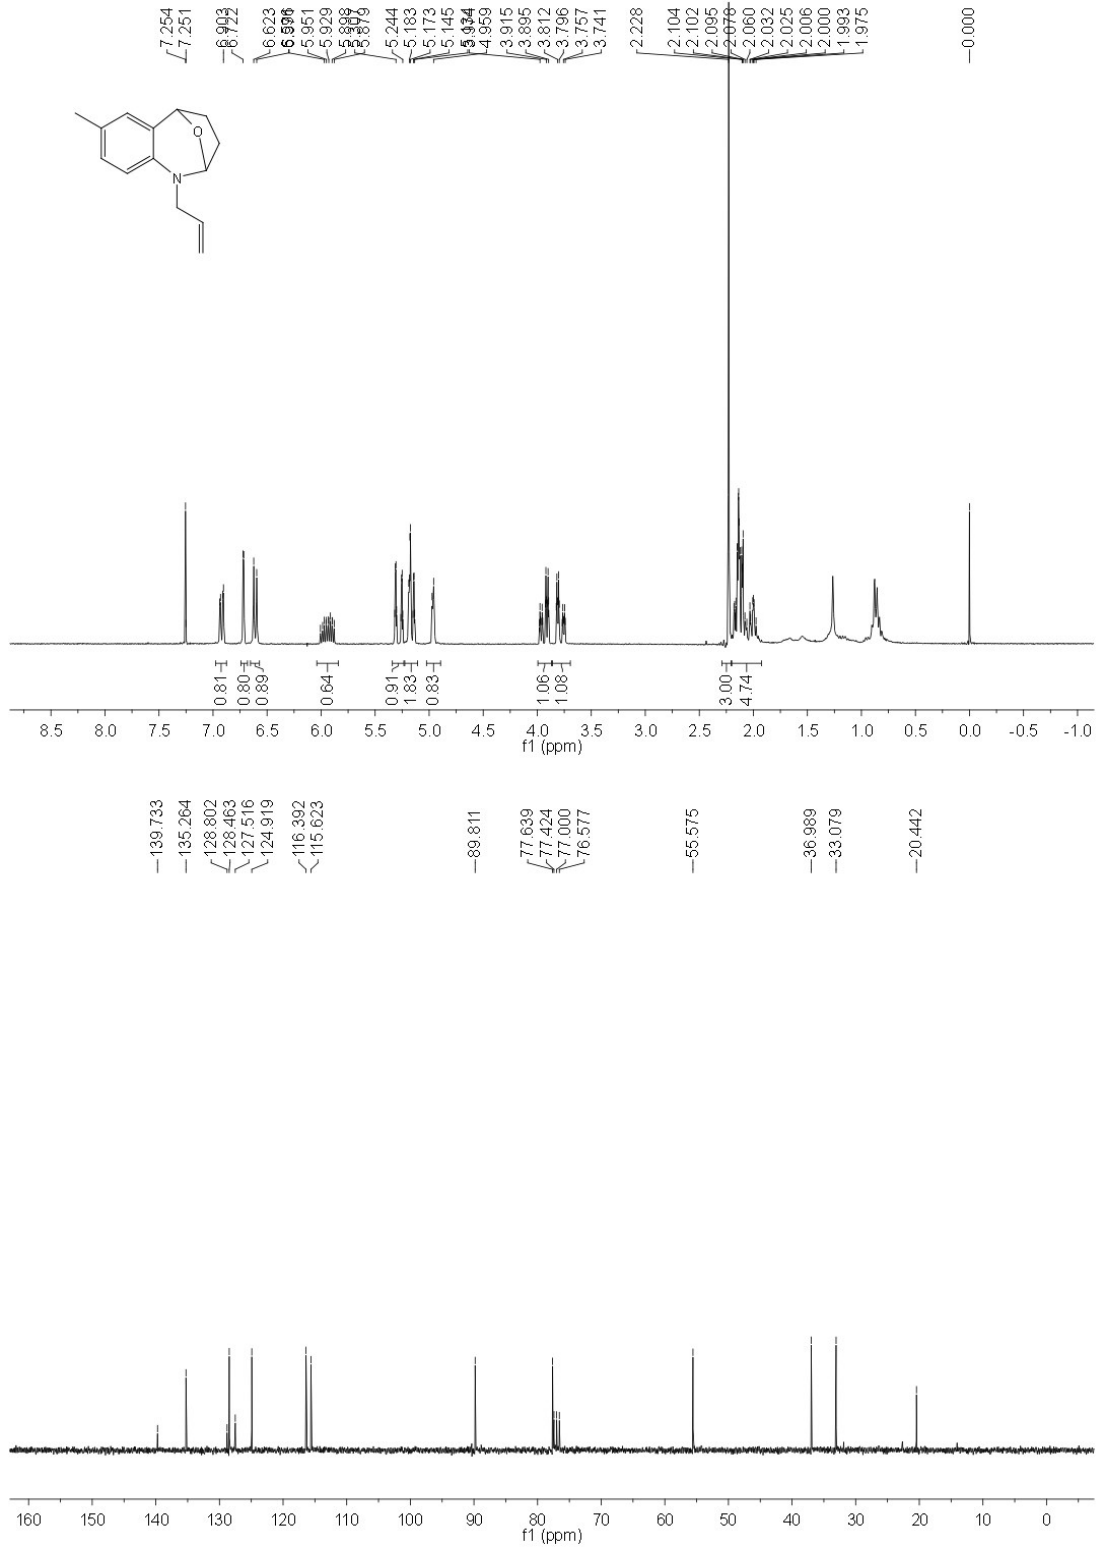

# NMR spectrum of Compound 1c

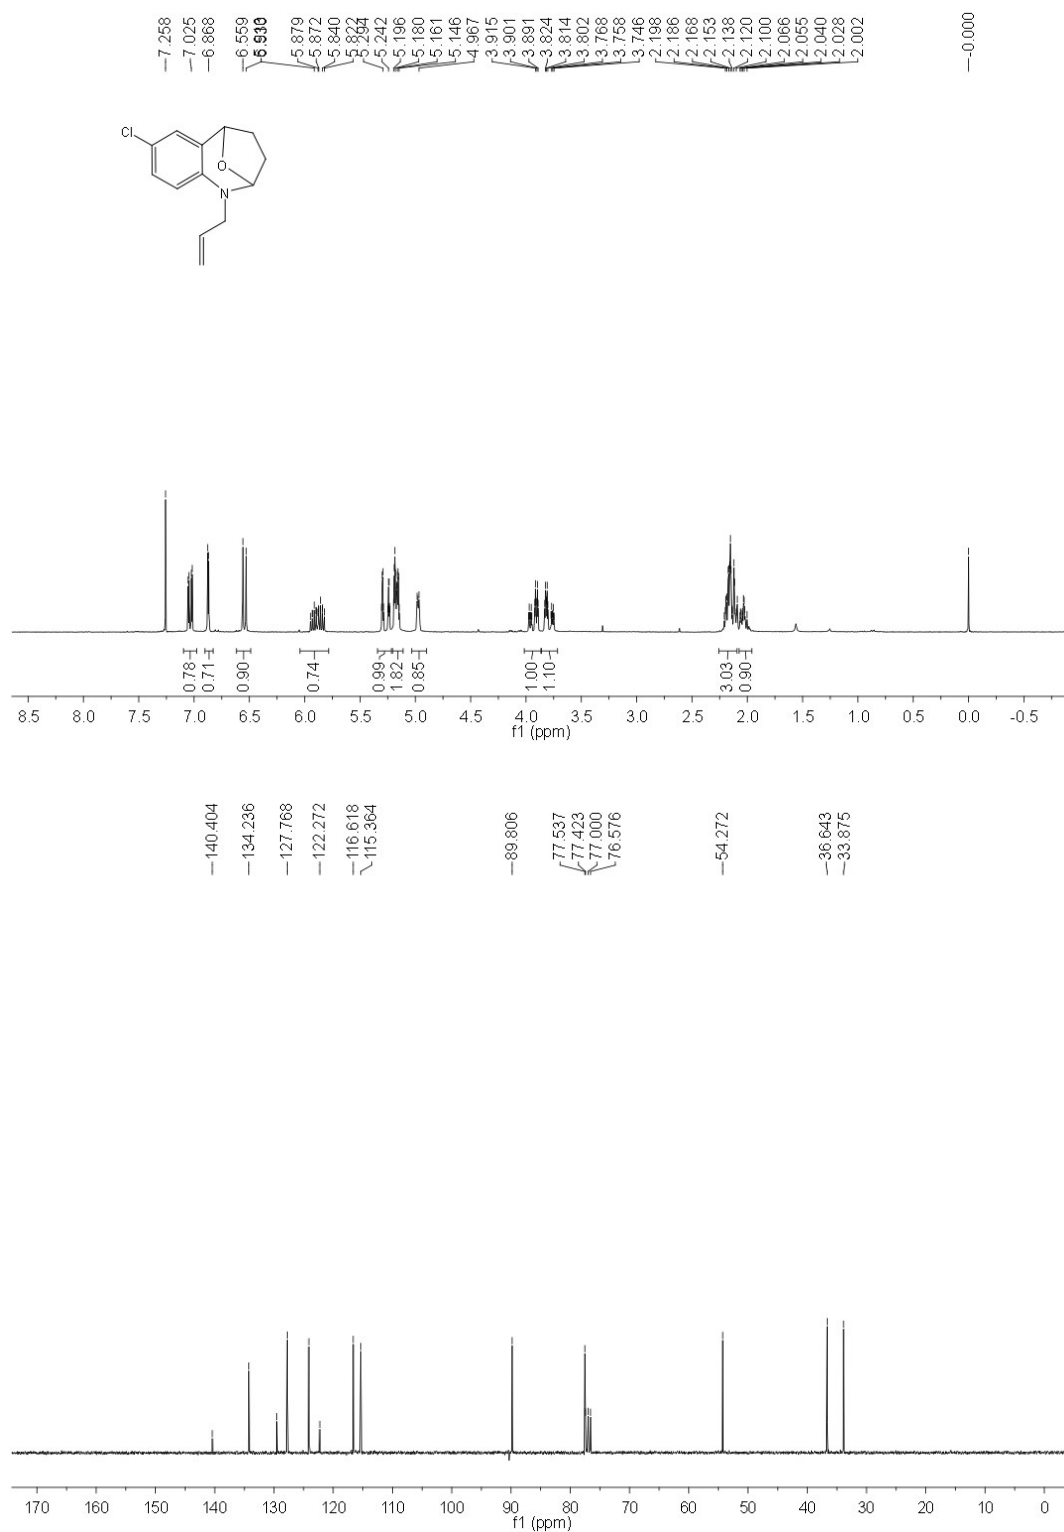

NMR spectrum of Compound **1d**

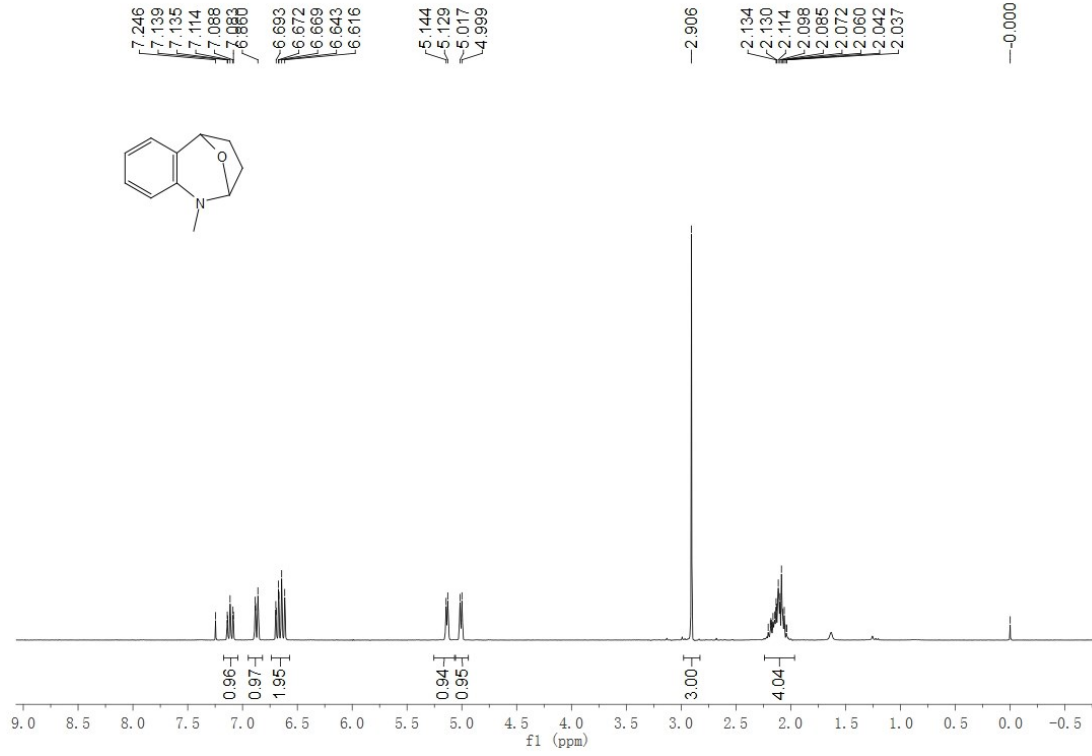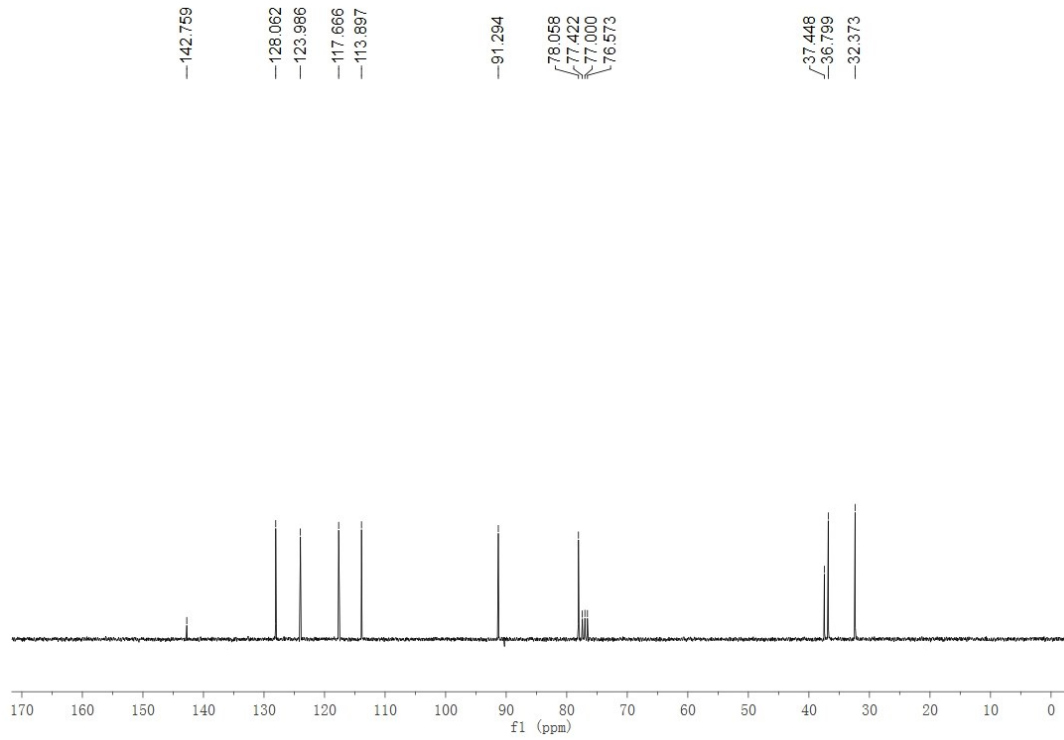

# NMR spectrum of Compound 1e

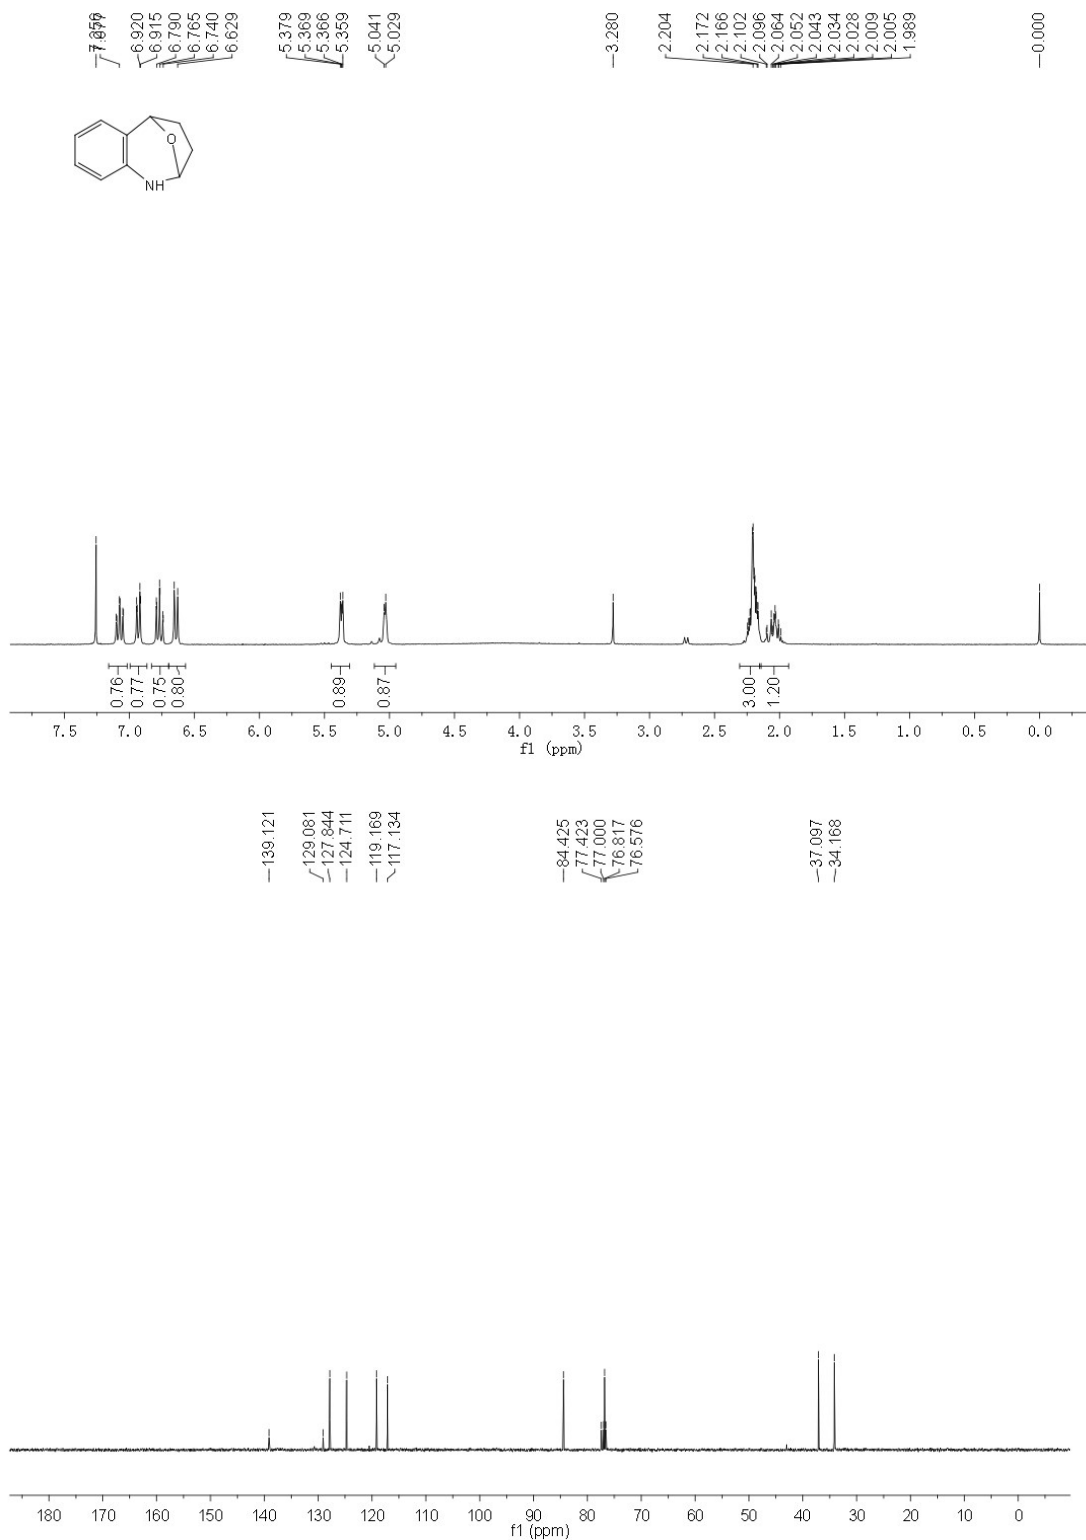

# NMR spectrum of Compound syn-2a

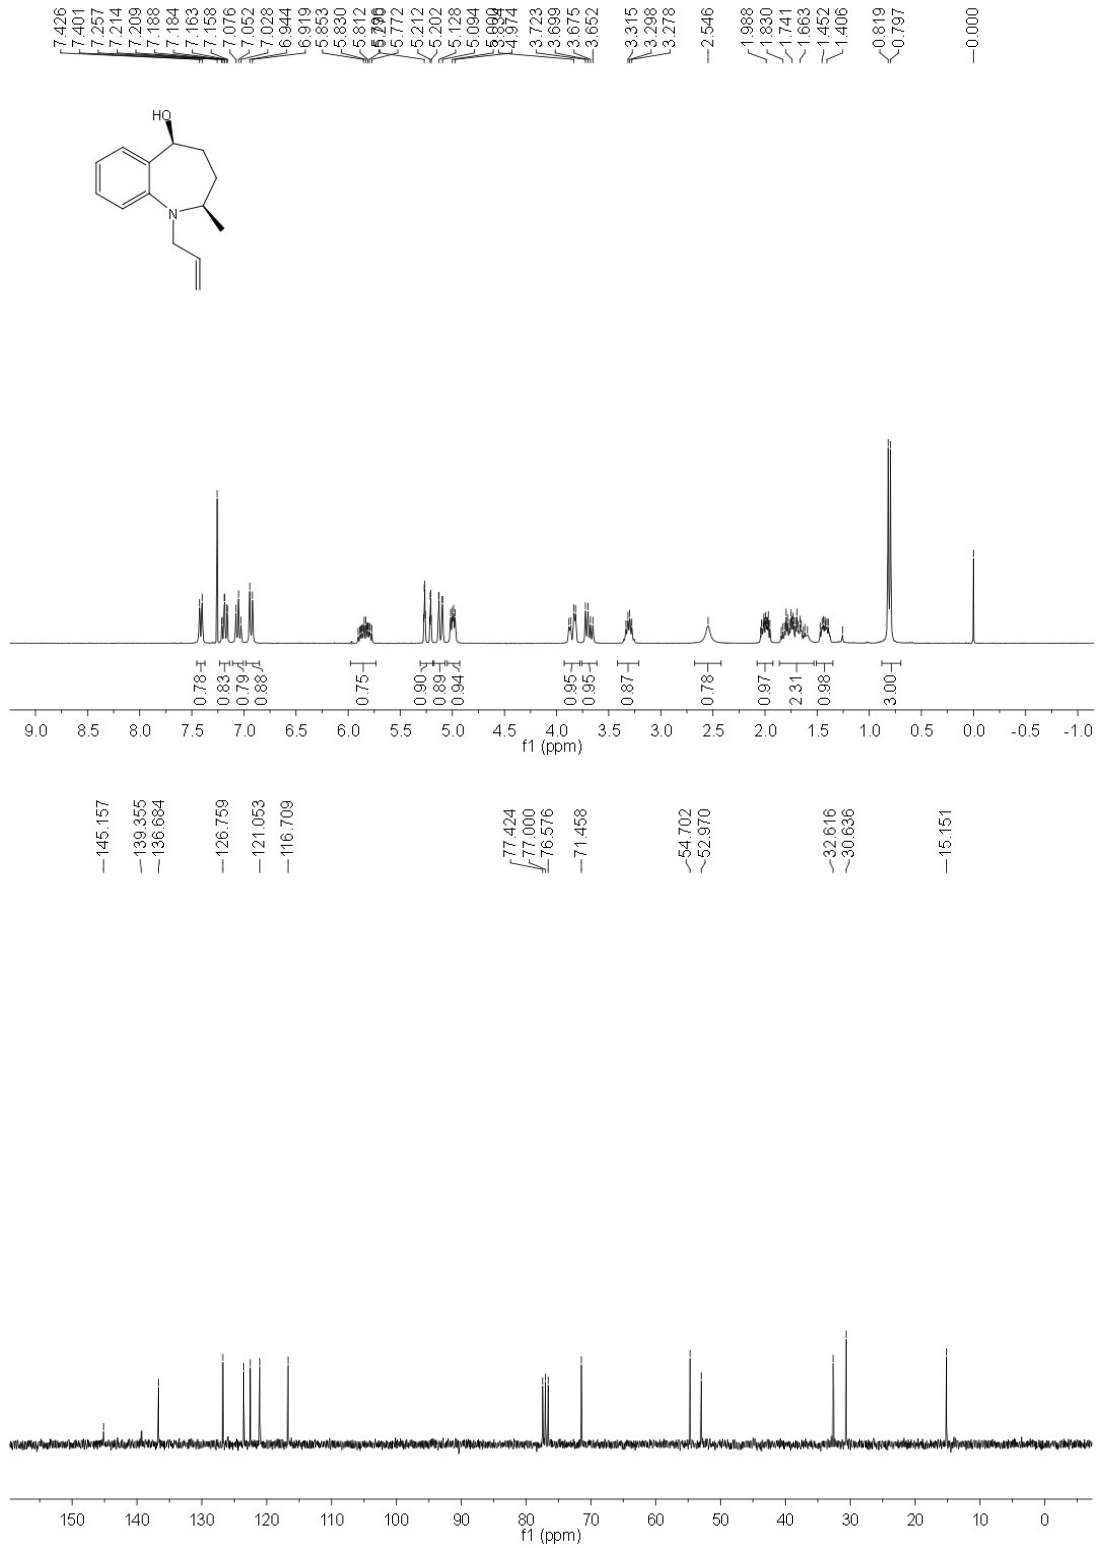

# <sup>1</sup>H NMR spectrum of Compound anti-2a

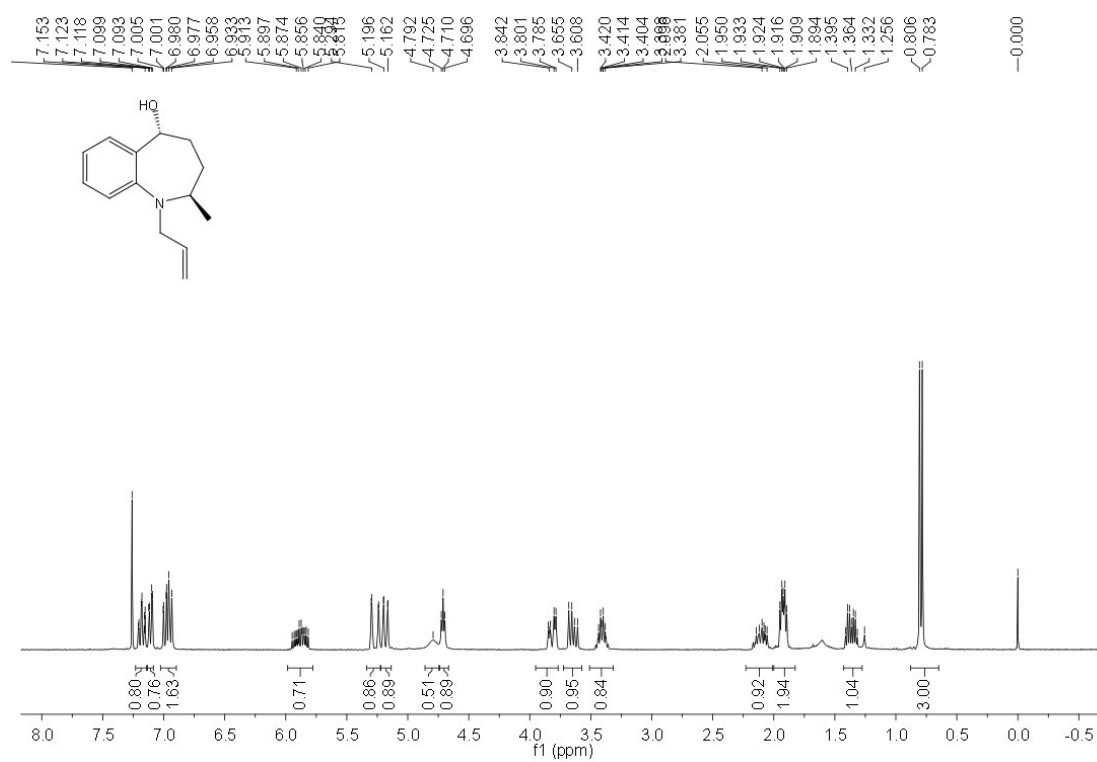

NMR spectrum of Compound **2b** (syn/anti = 91/9)

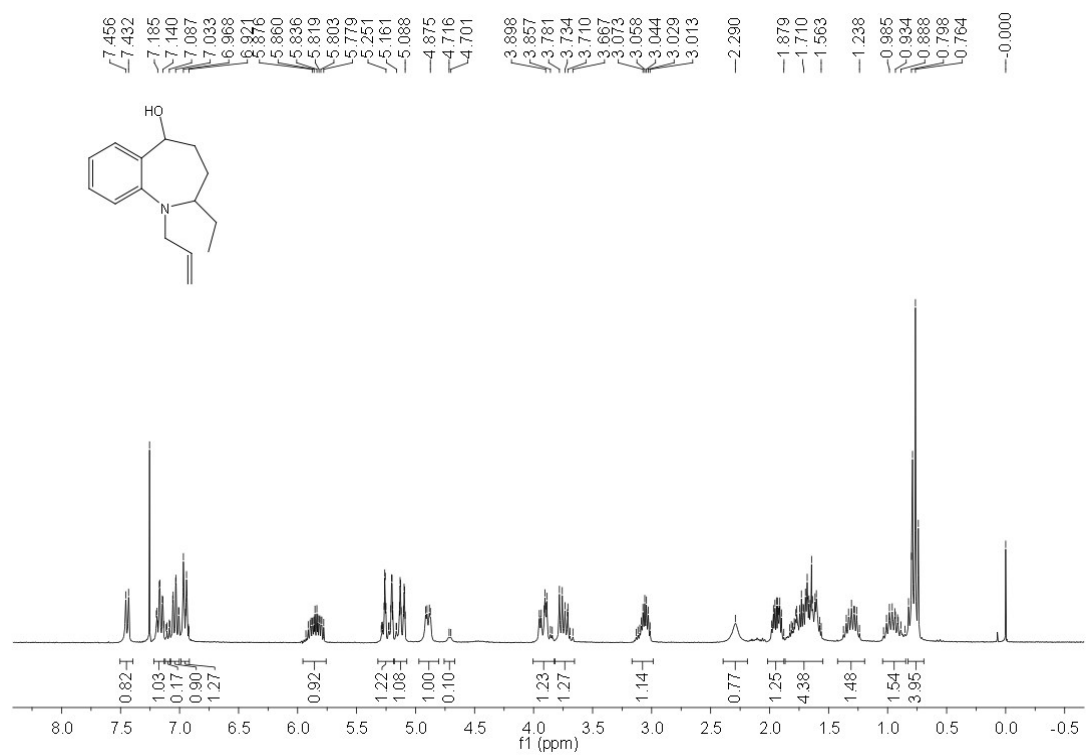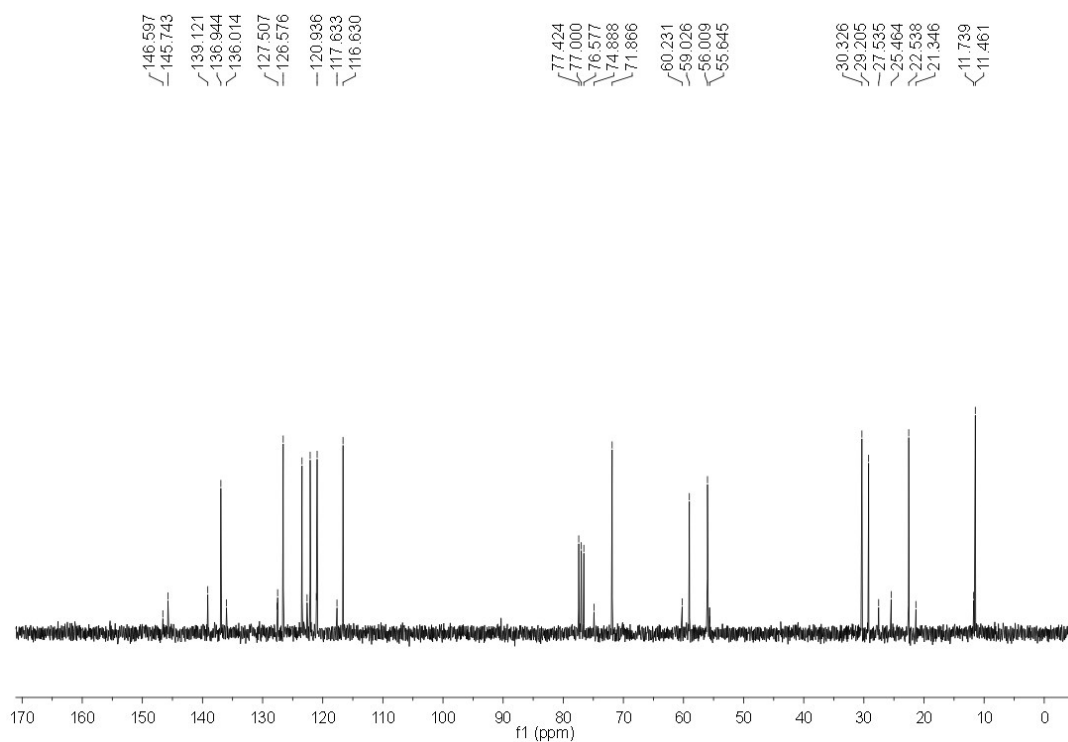

# NMR spectrum of Compound 2c (syn)

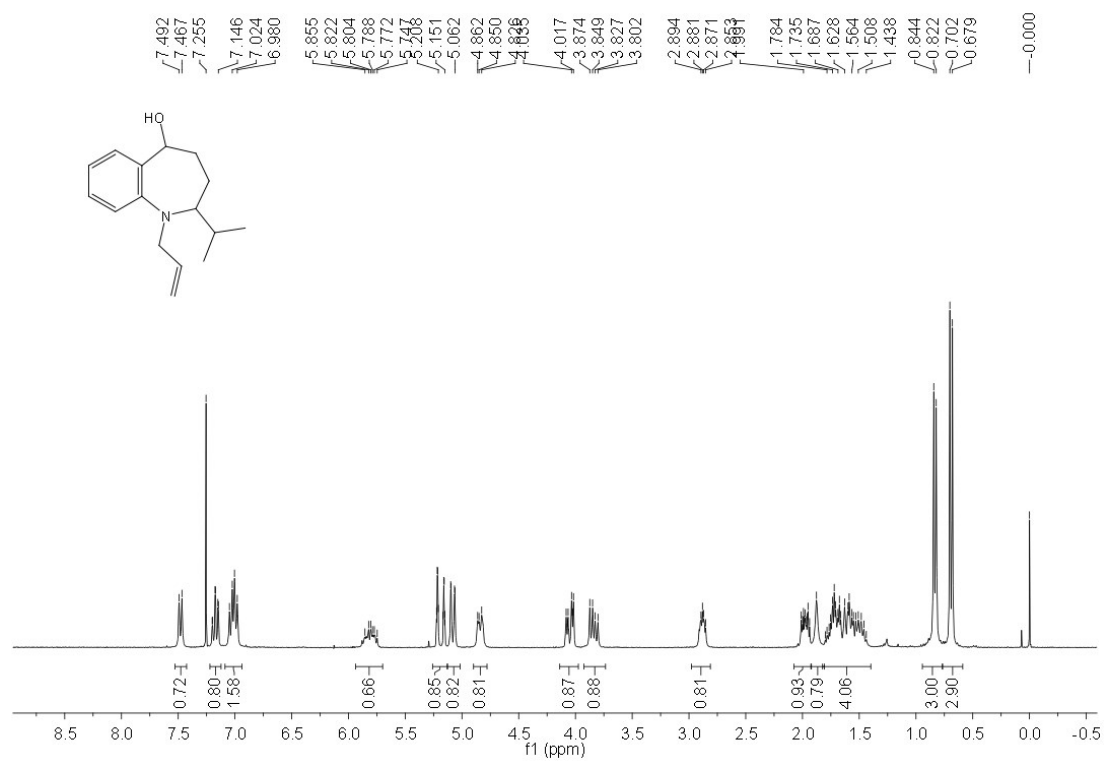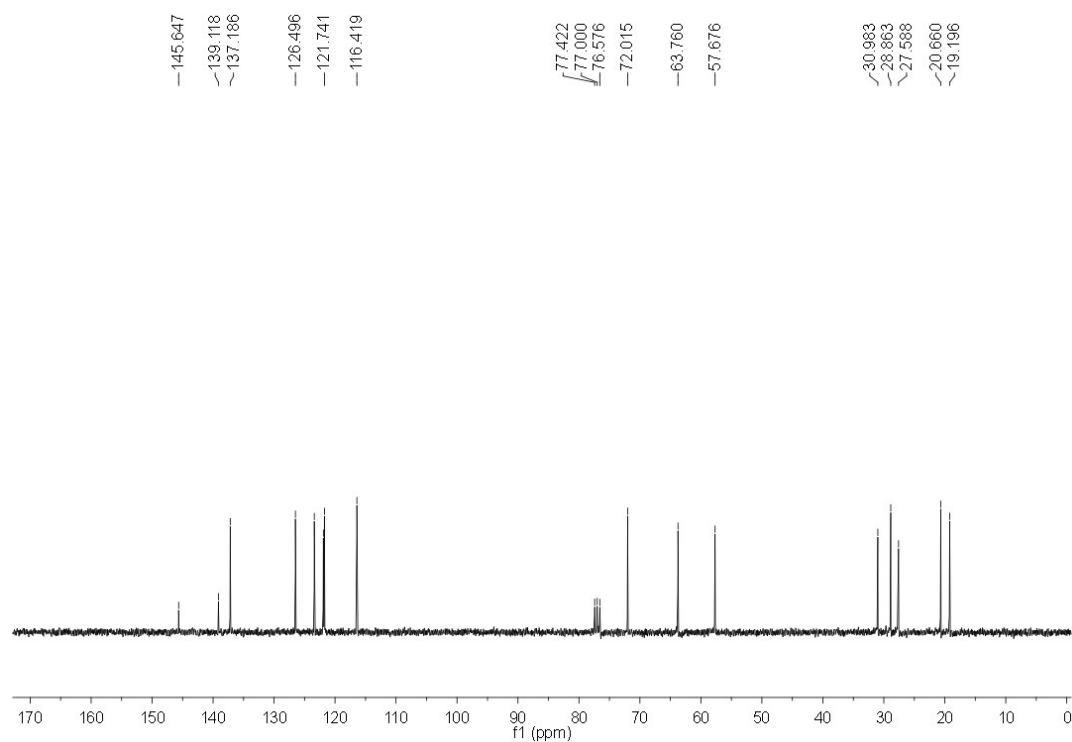



NMR spectrum of Compound **2d** (syn)

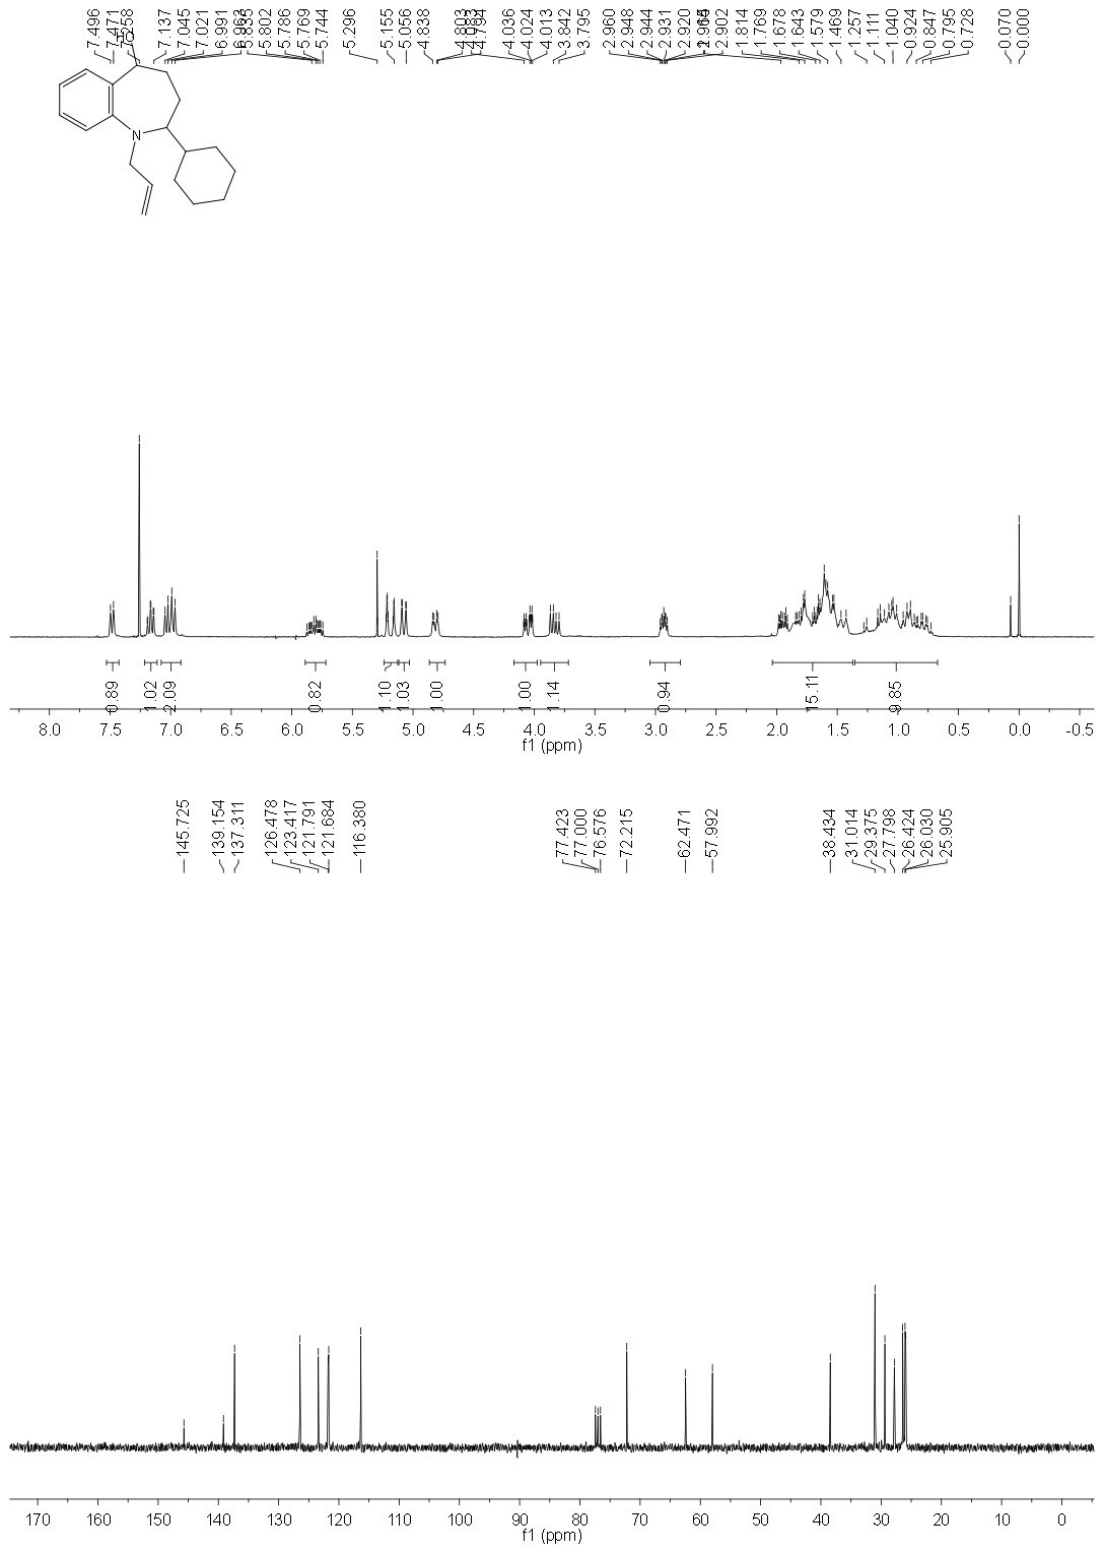

# NMR spectrum of Compound 2e (anti)

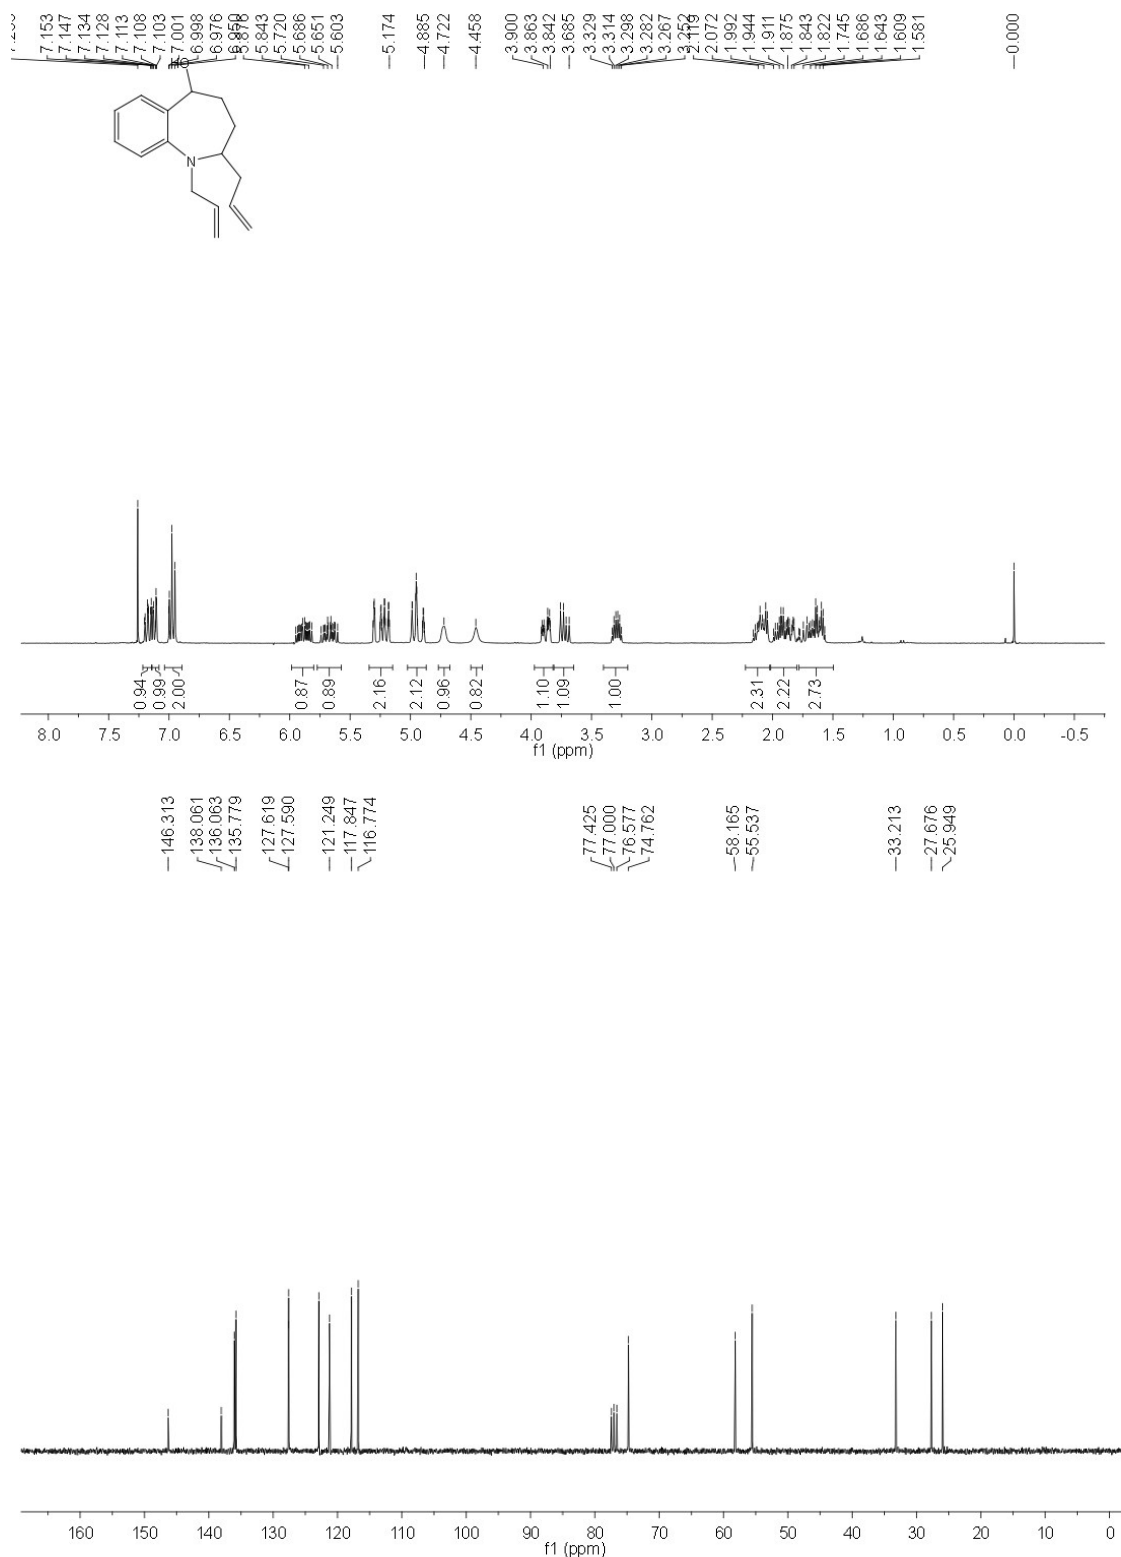

NMR spectrum of Compound **2f** (syn/anti = 95/5)

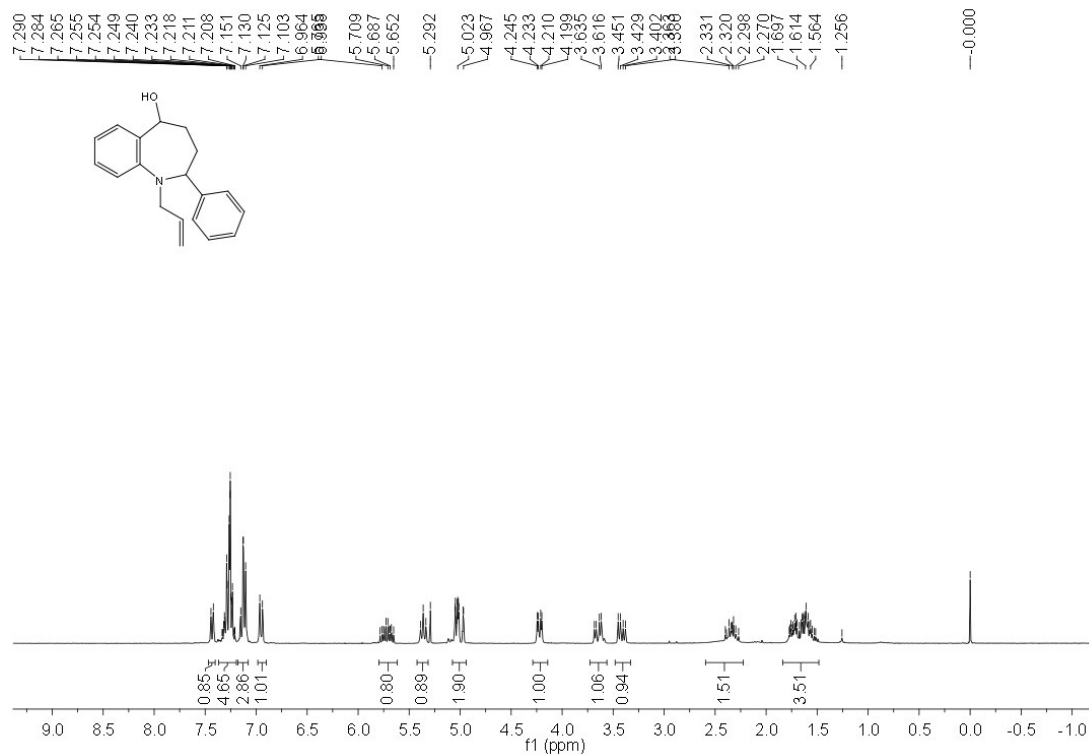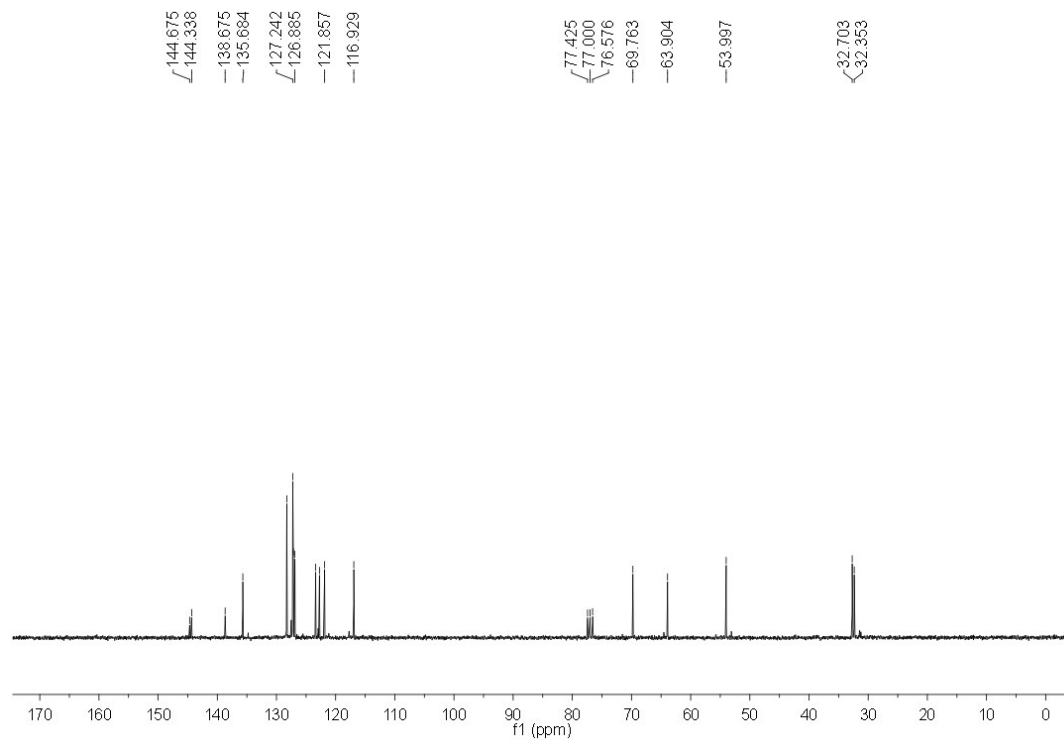

NMR spectrum of Compound **2g** (syn/anti = 88/12)

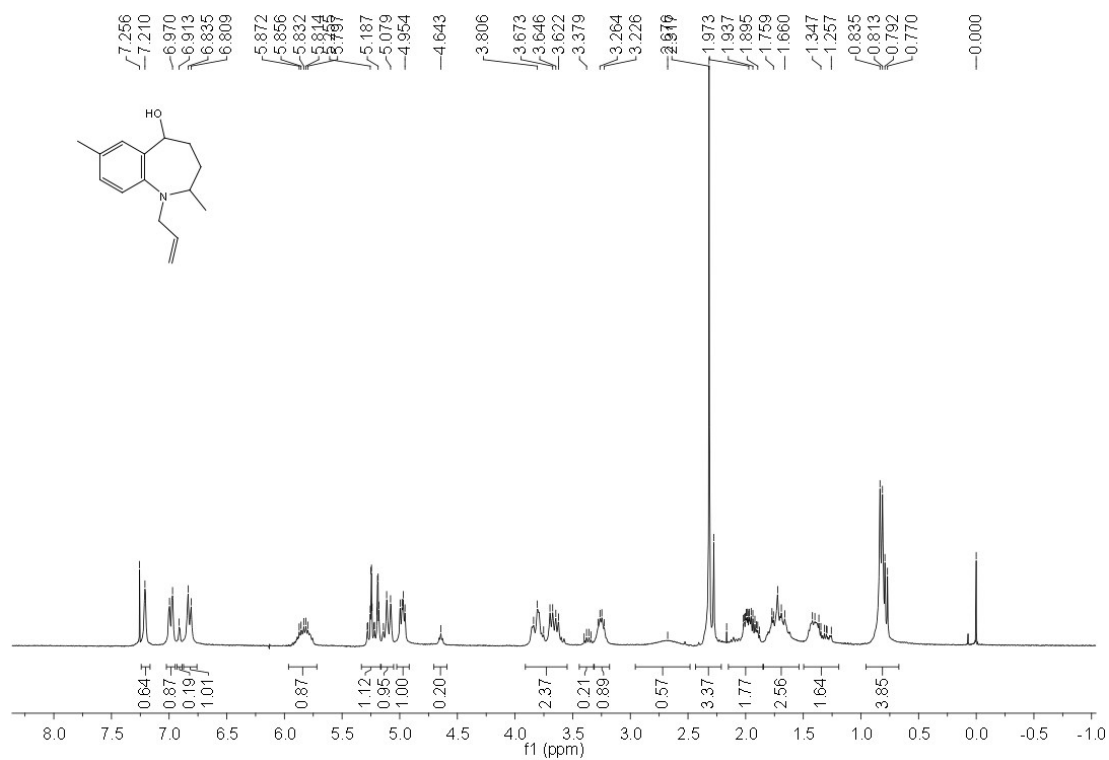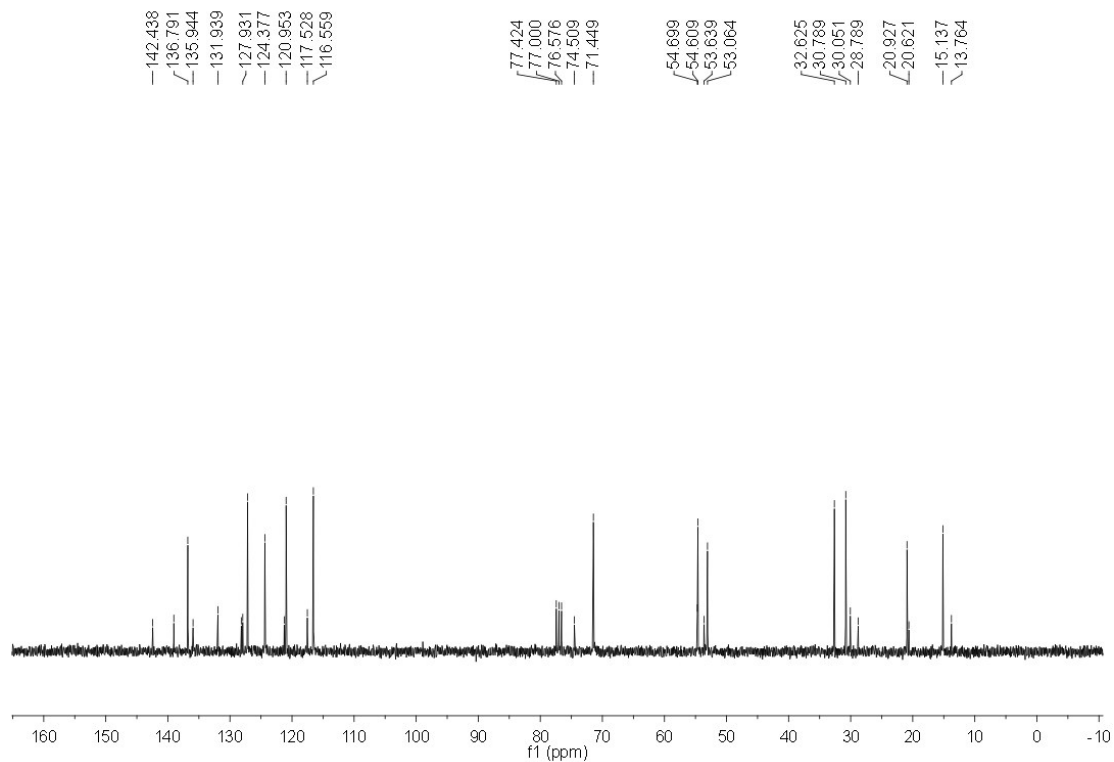

NMR spectrum of Compound **2h** (anti)

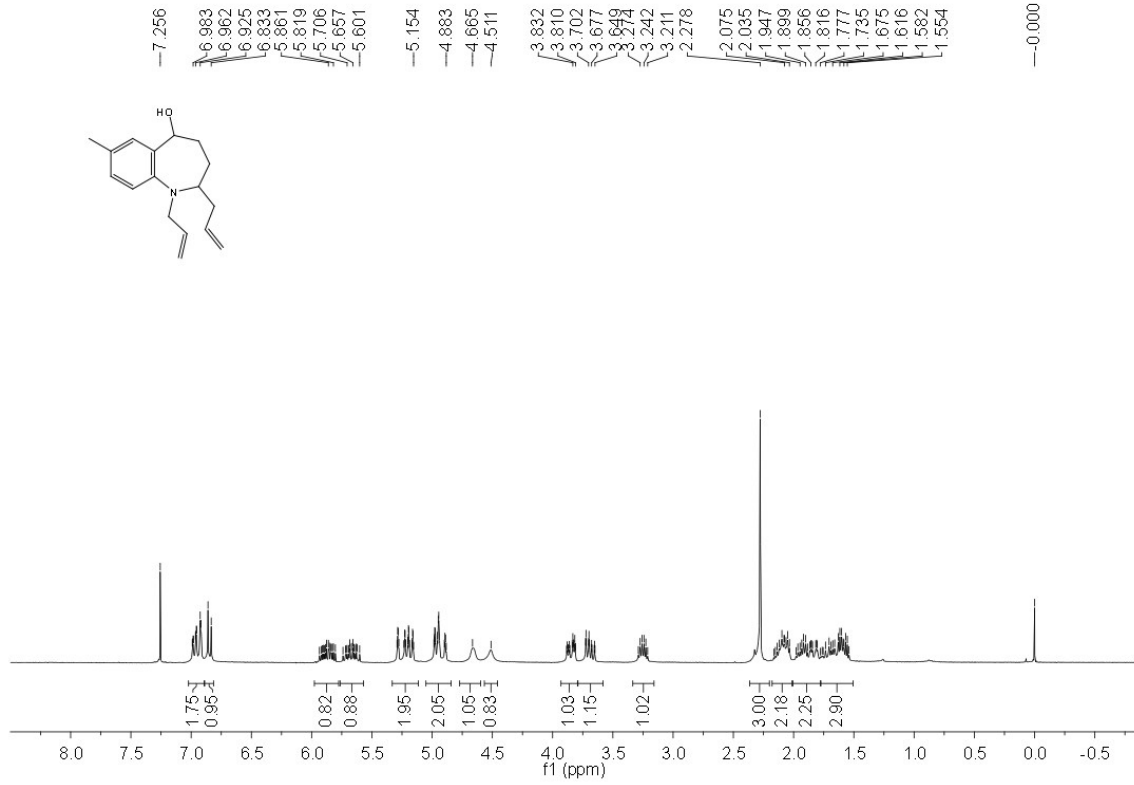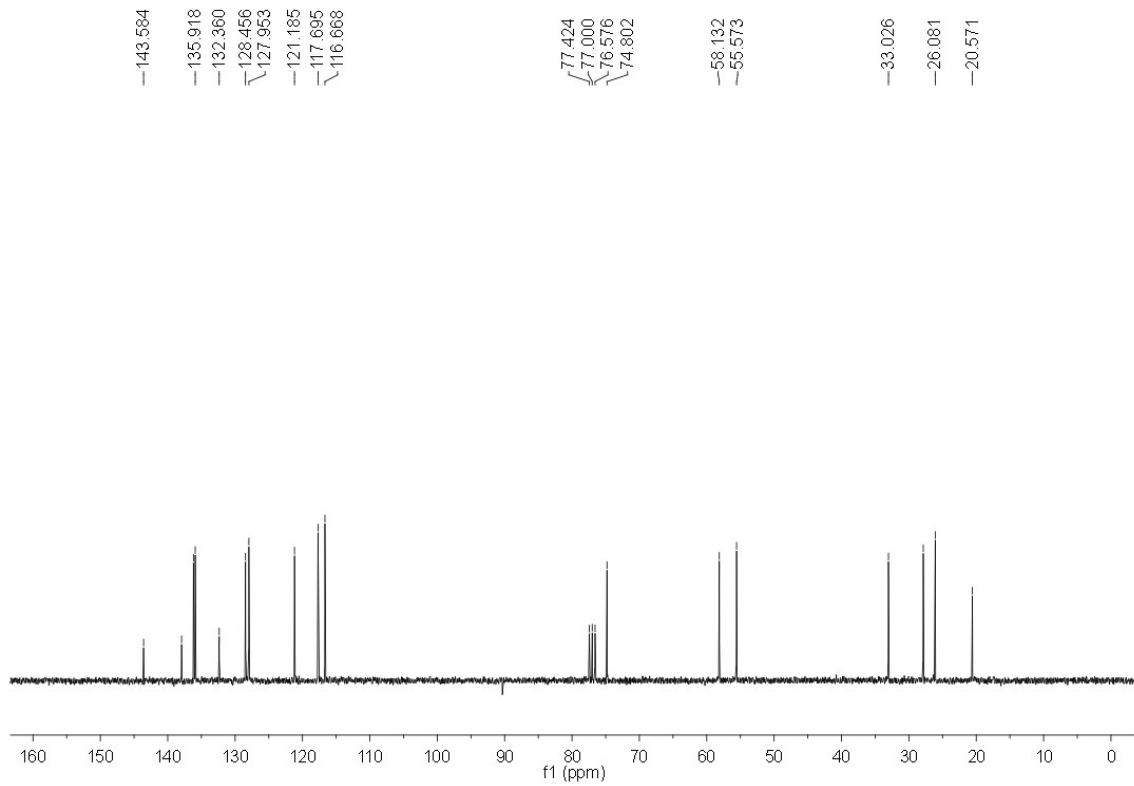

NMR spectrum of Compound **2i** (syn/anti = 67/33)

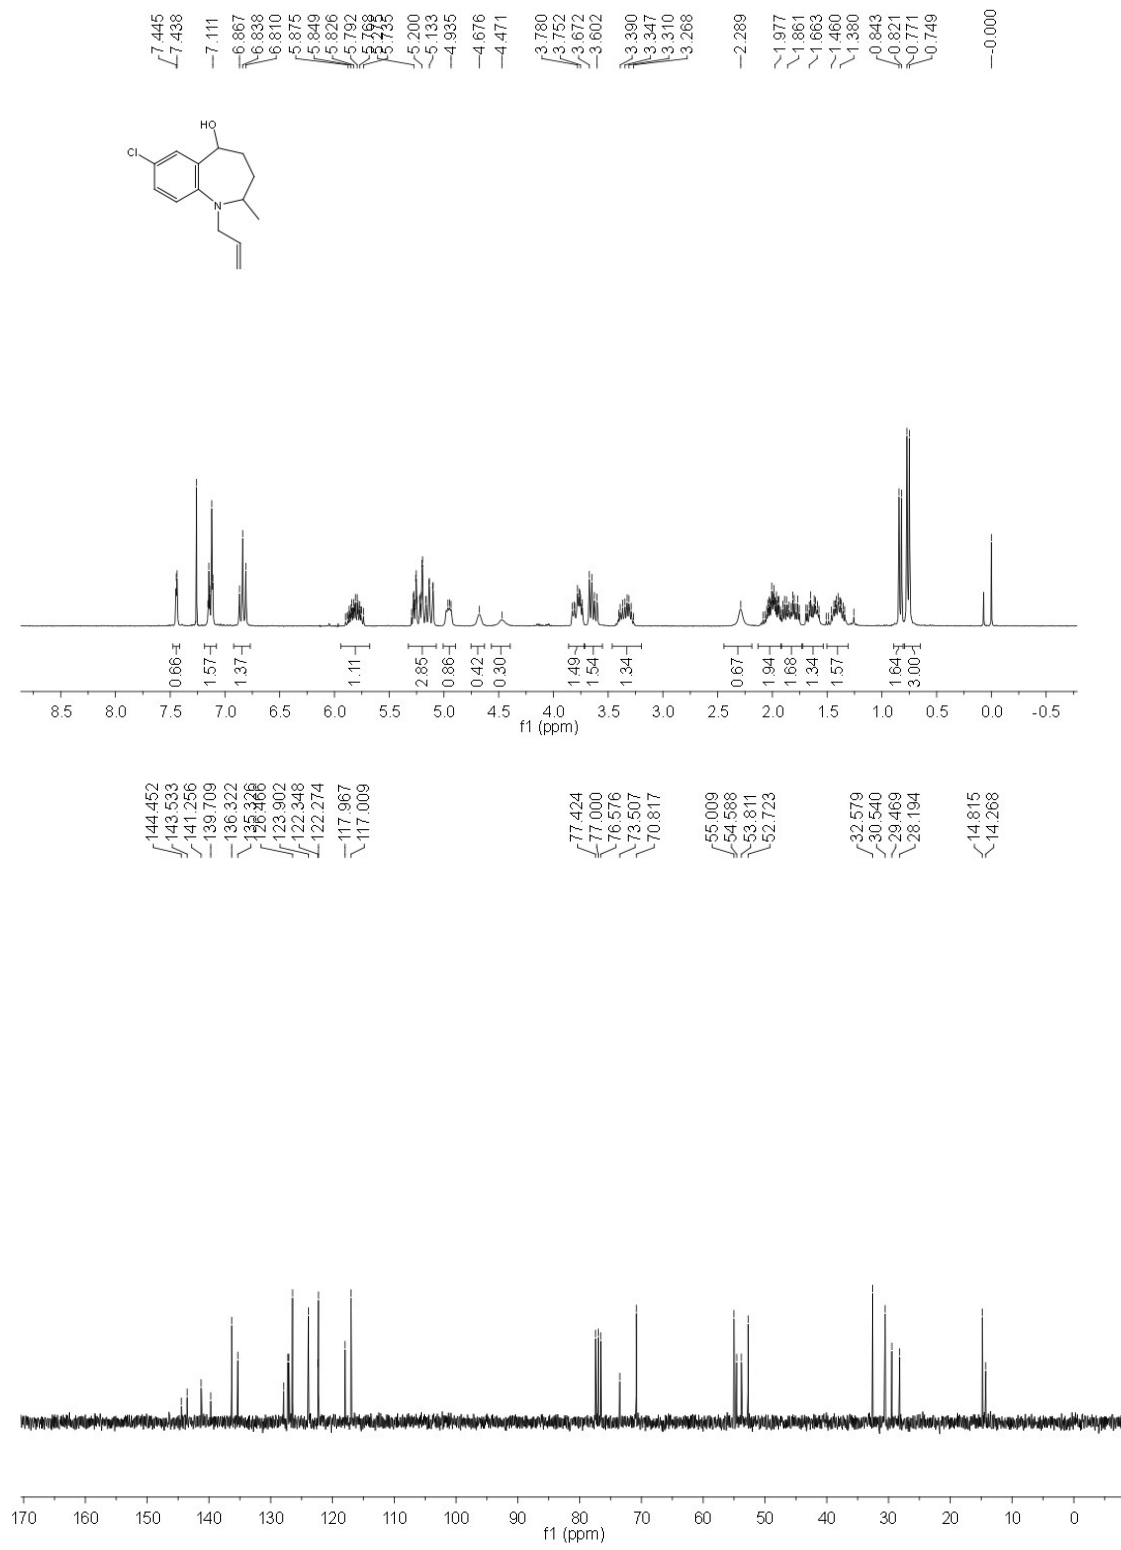

NMR spectrum of Compound **2j** (anti)

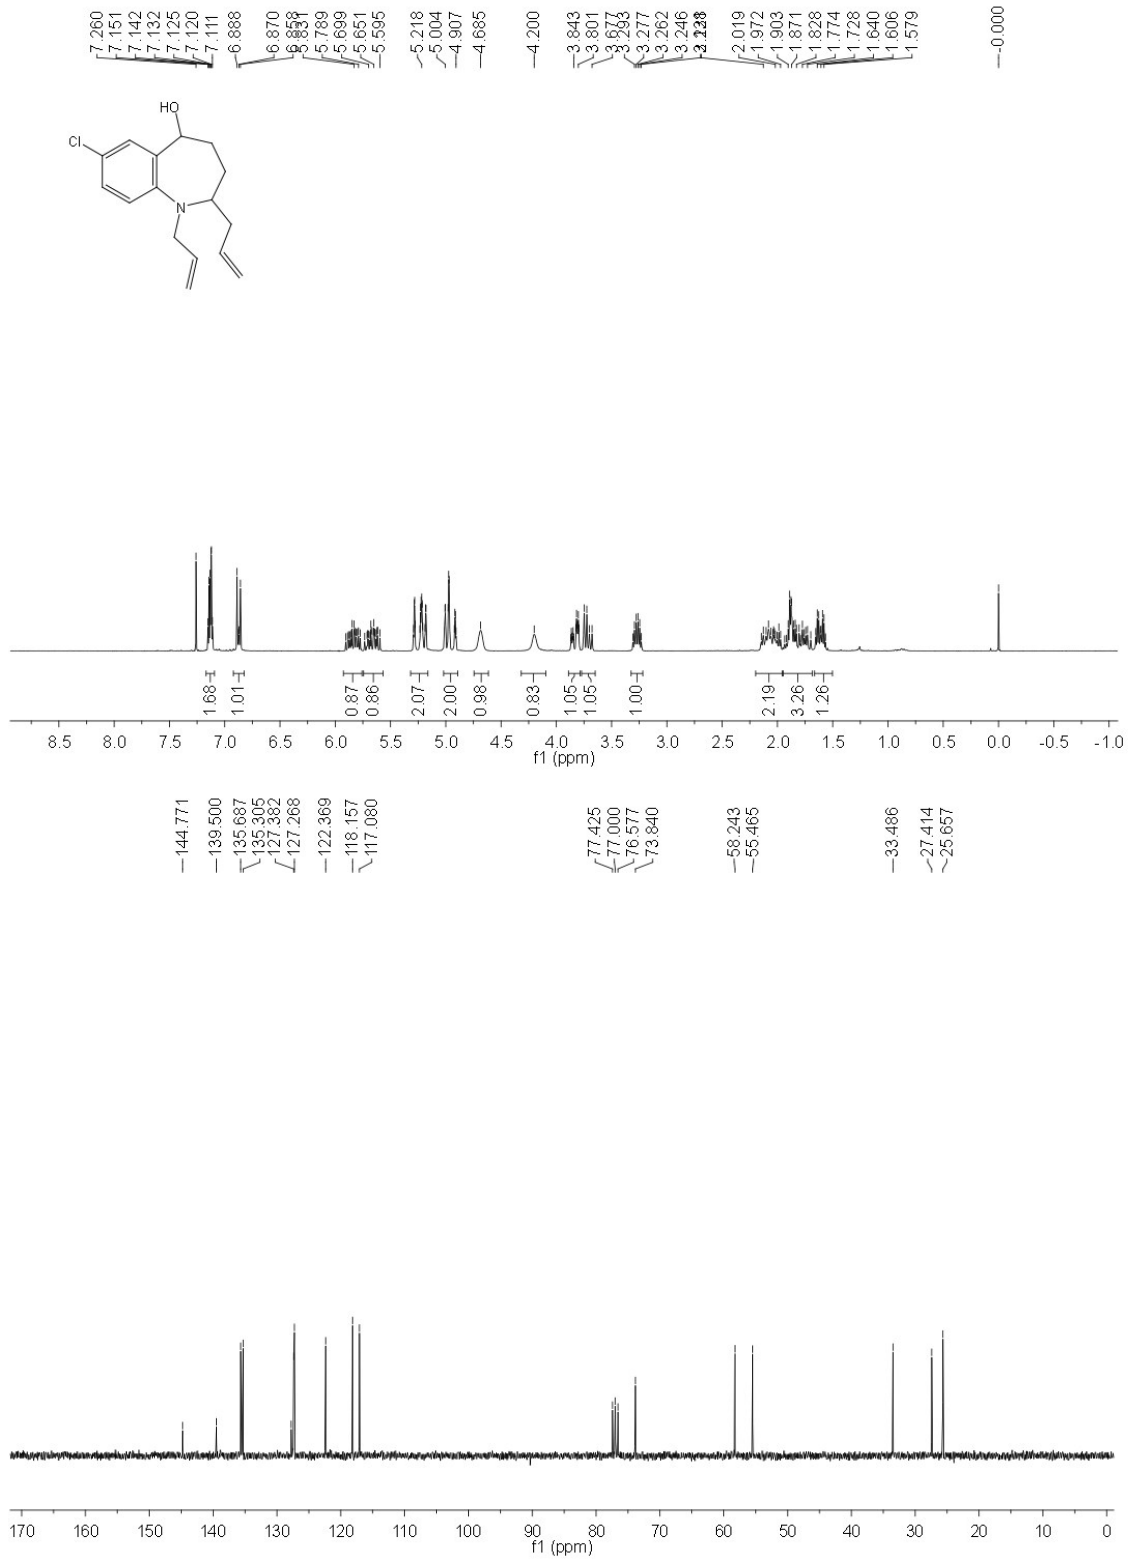

NMR spectrum of Compound **2k** (syn/anti = 68/32)

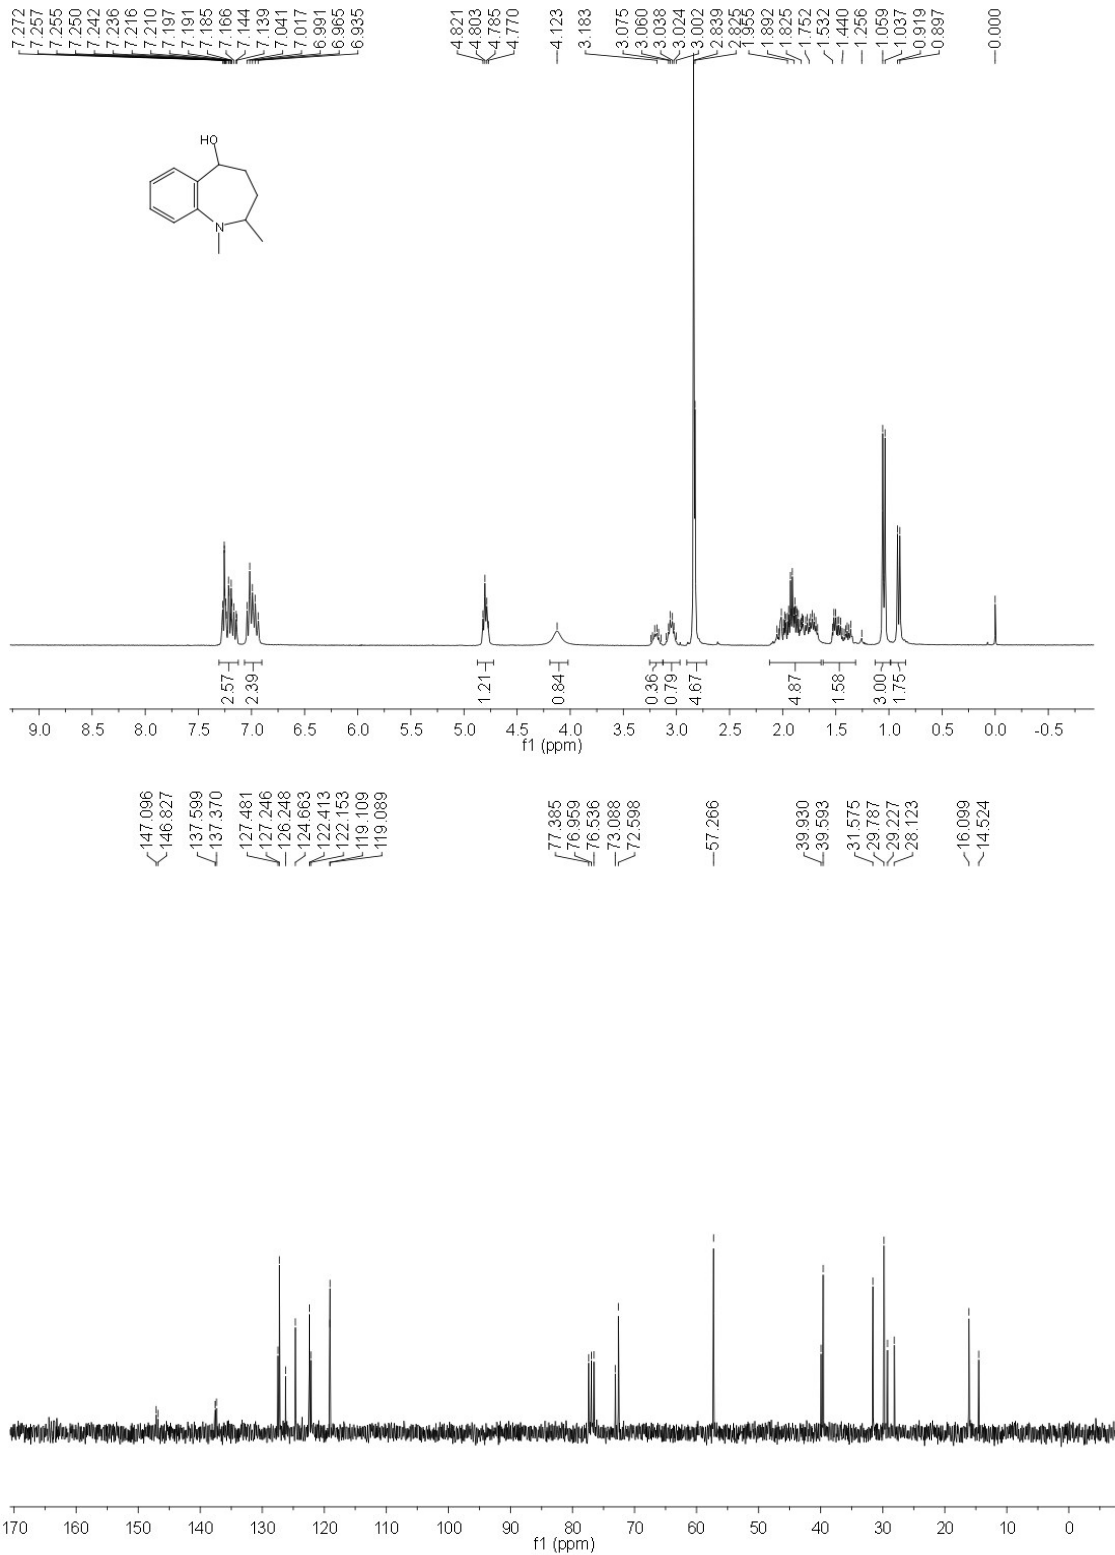



NMR spectrum of Compound **21** (syn)

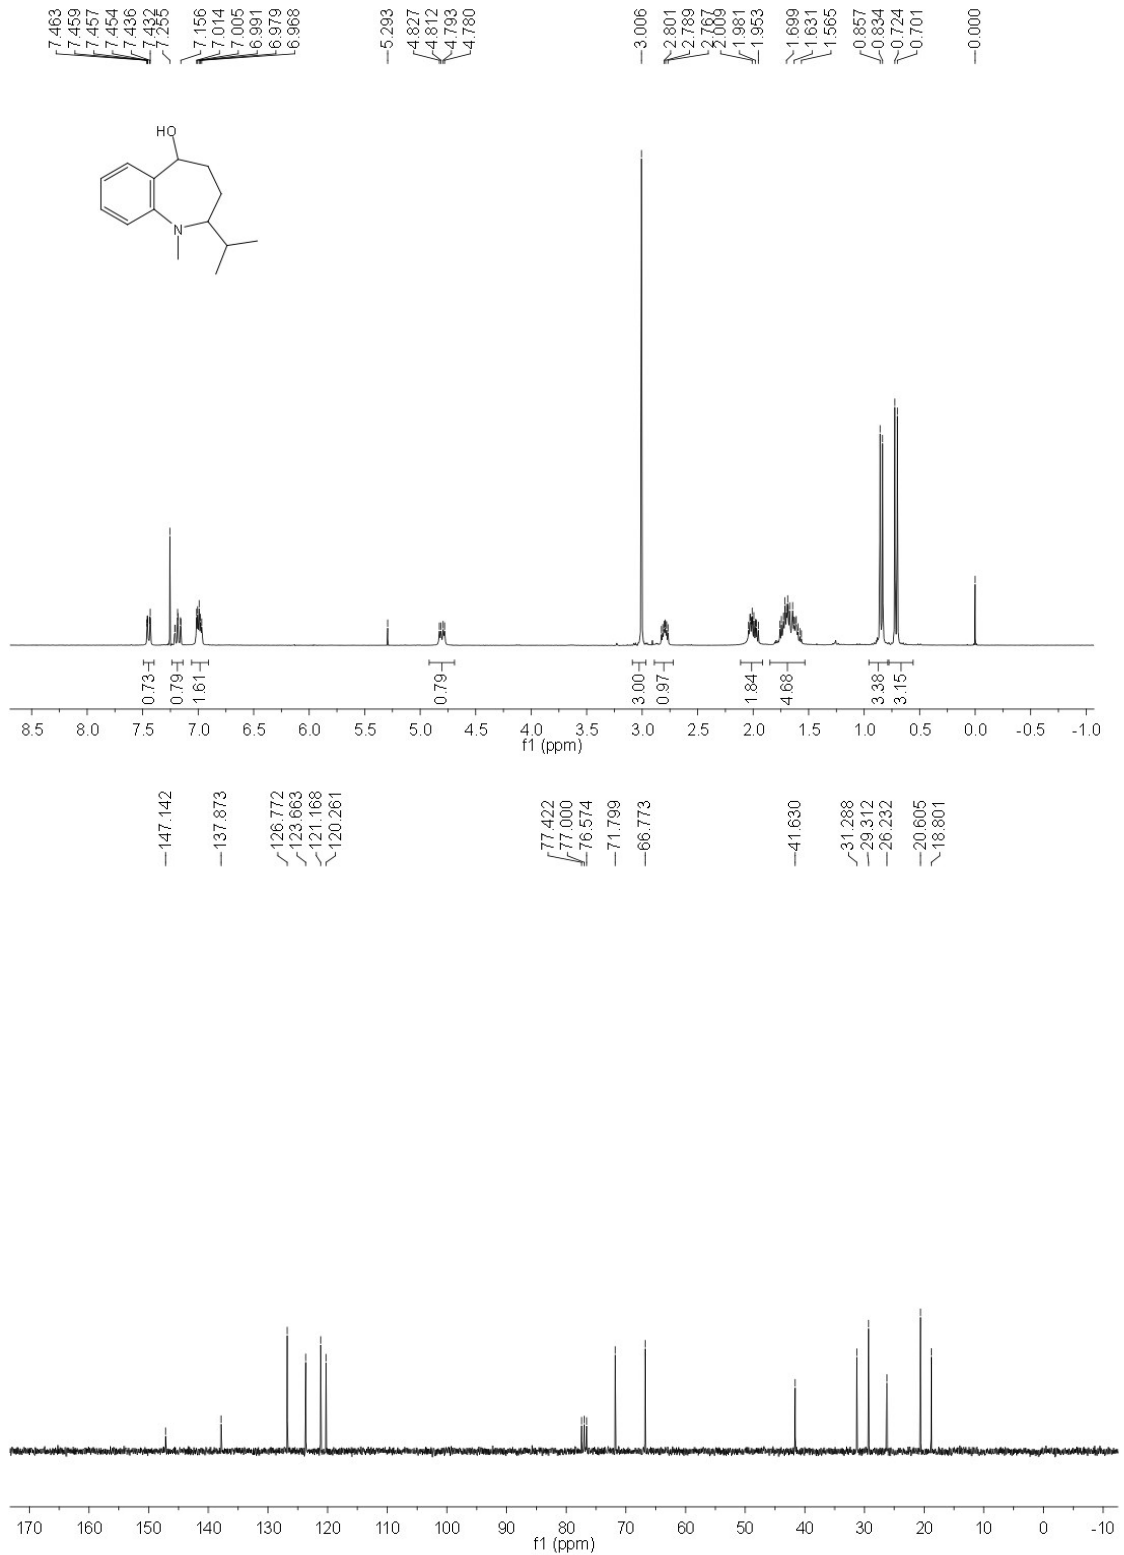

NMR spectrum of Compound **2m** (syn/anti = 91/9)

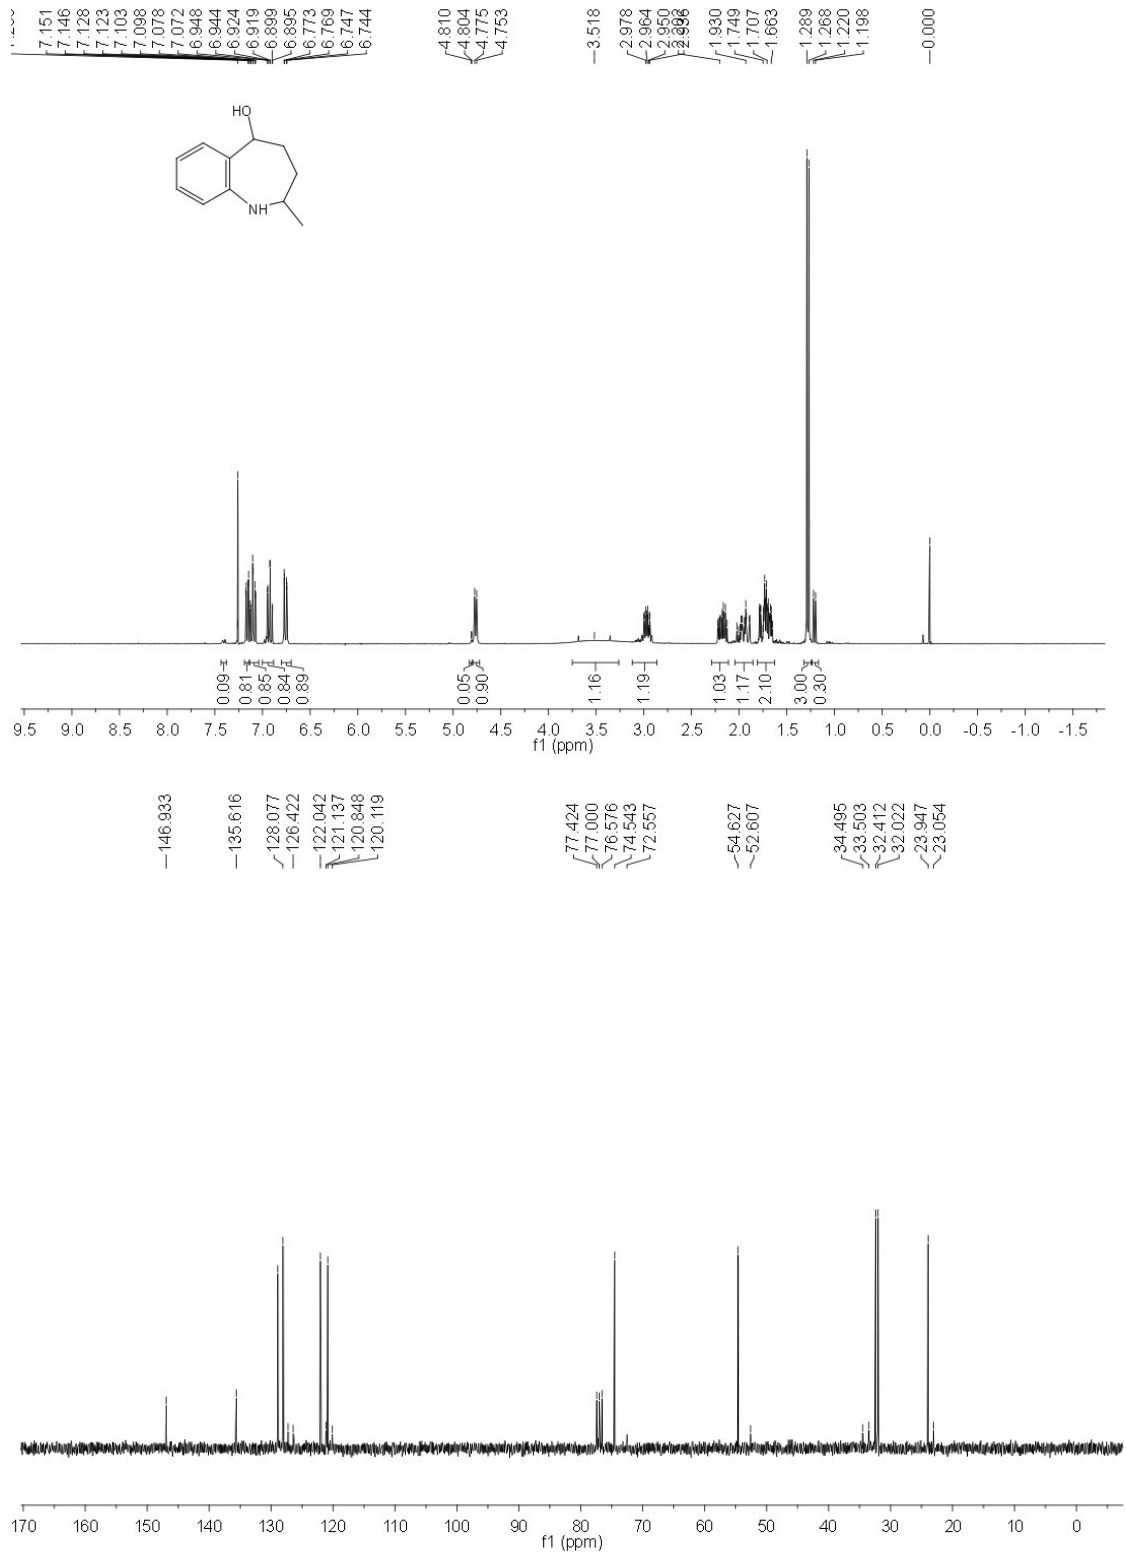

# NMR spectrum of Compound syn-2m

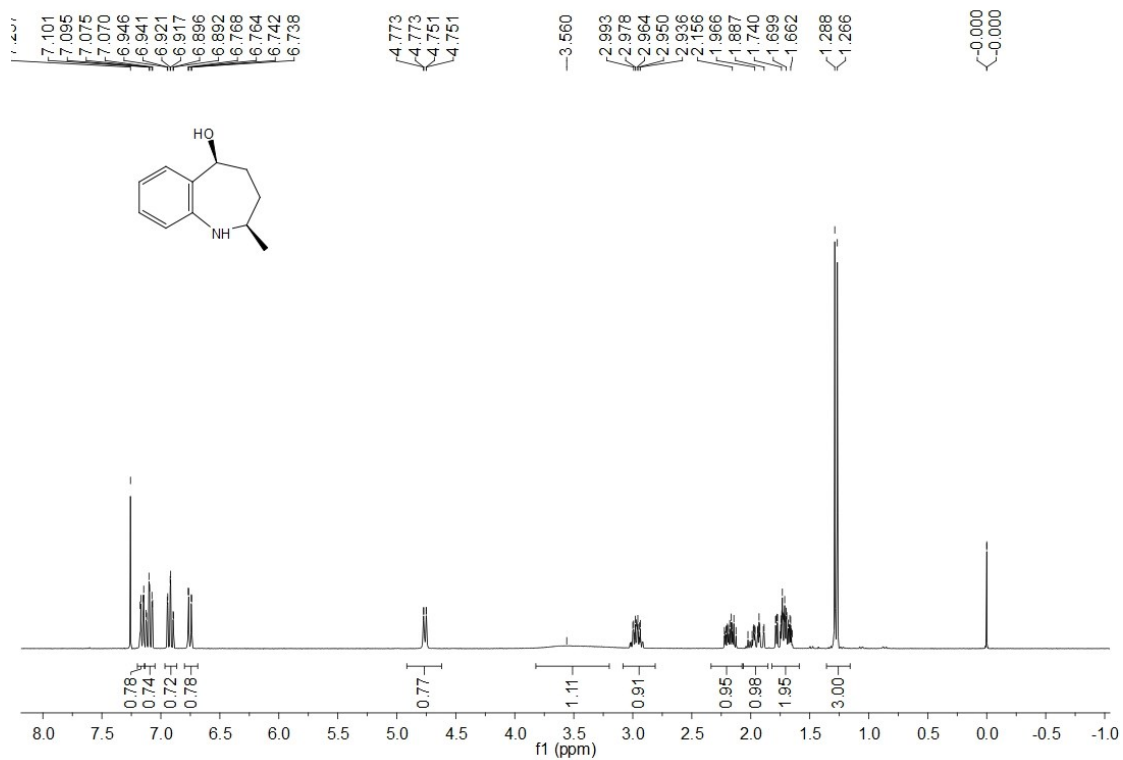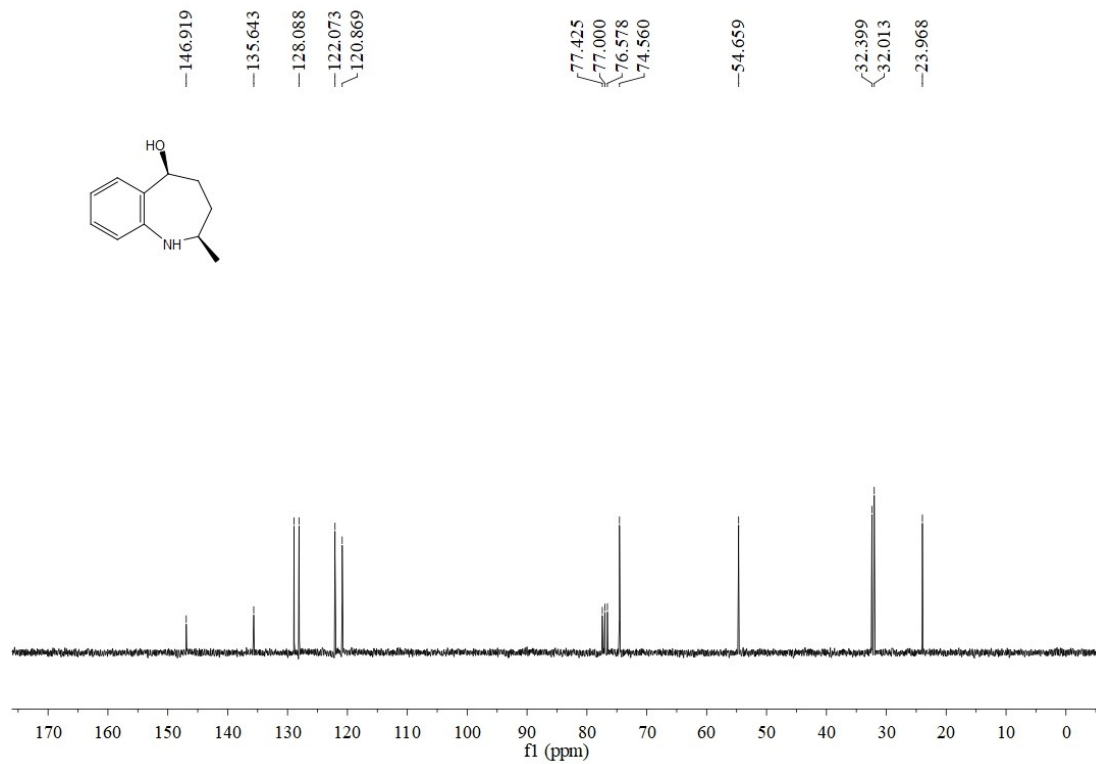

NMR spectrum of Compound **2n** (syn/anti = 75/25)

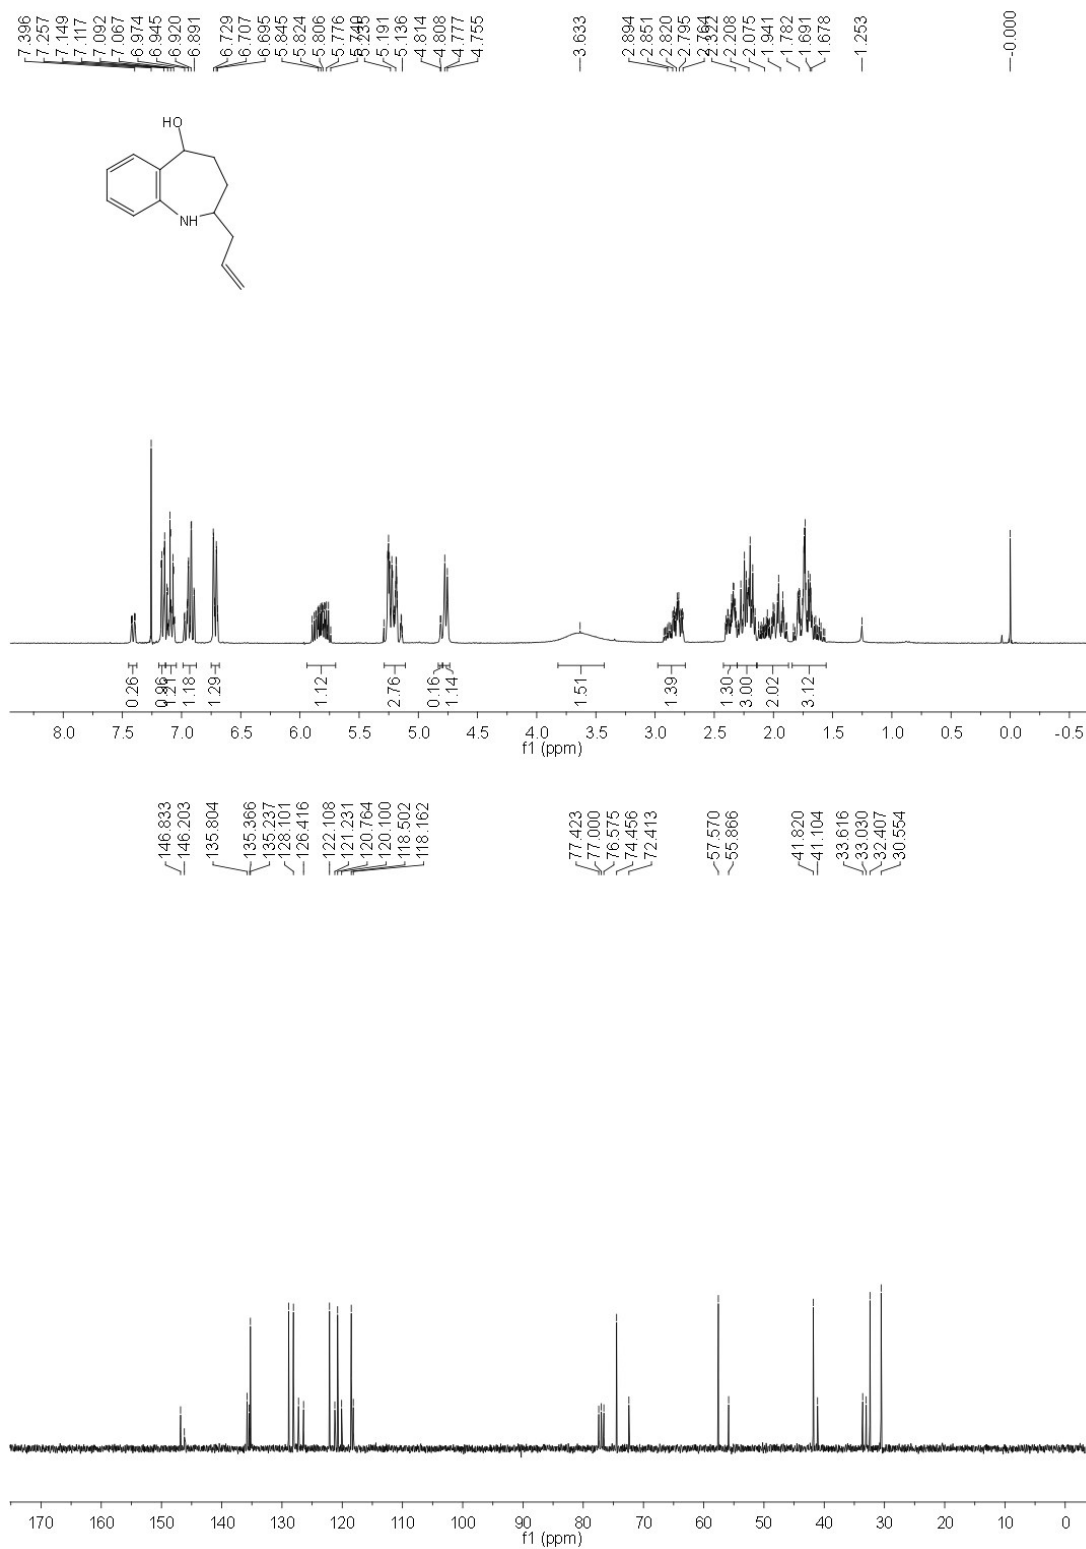

# NMR spectrum of Compound 3a

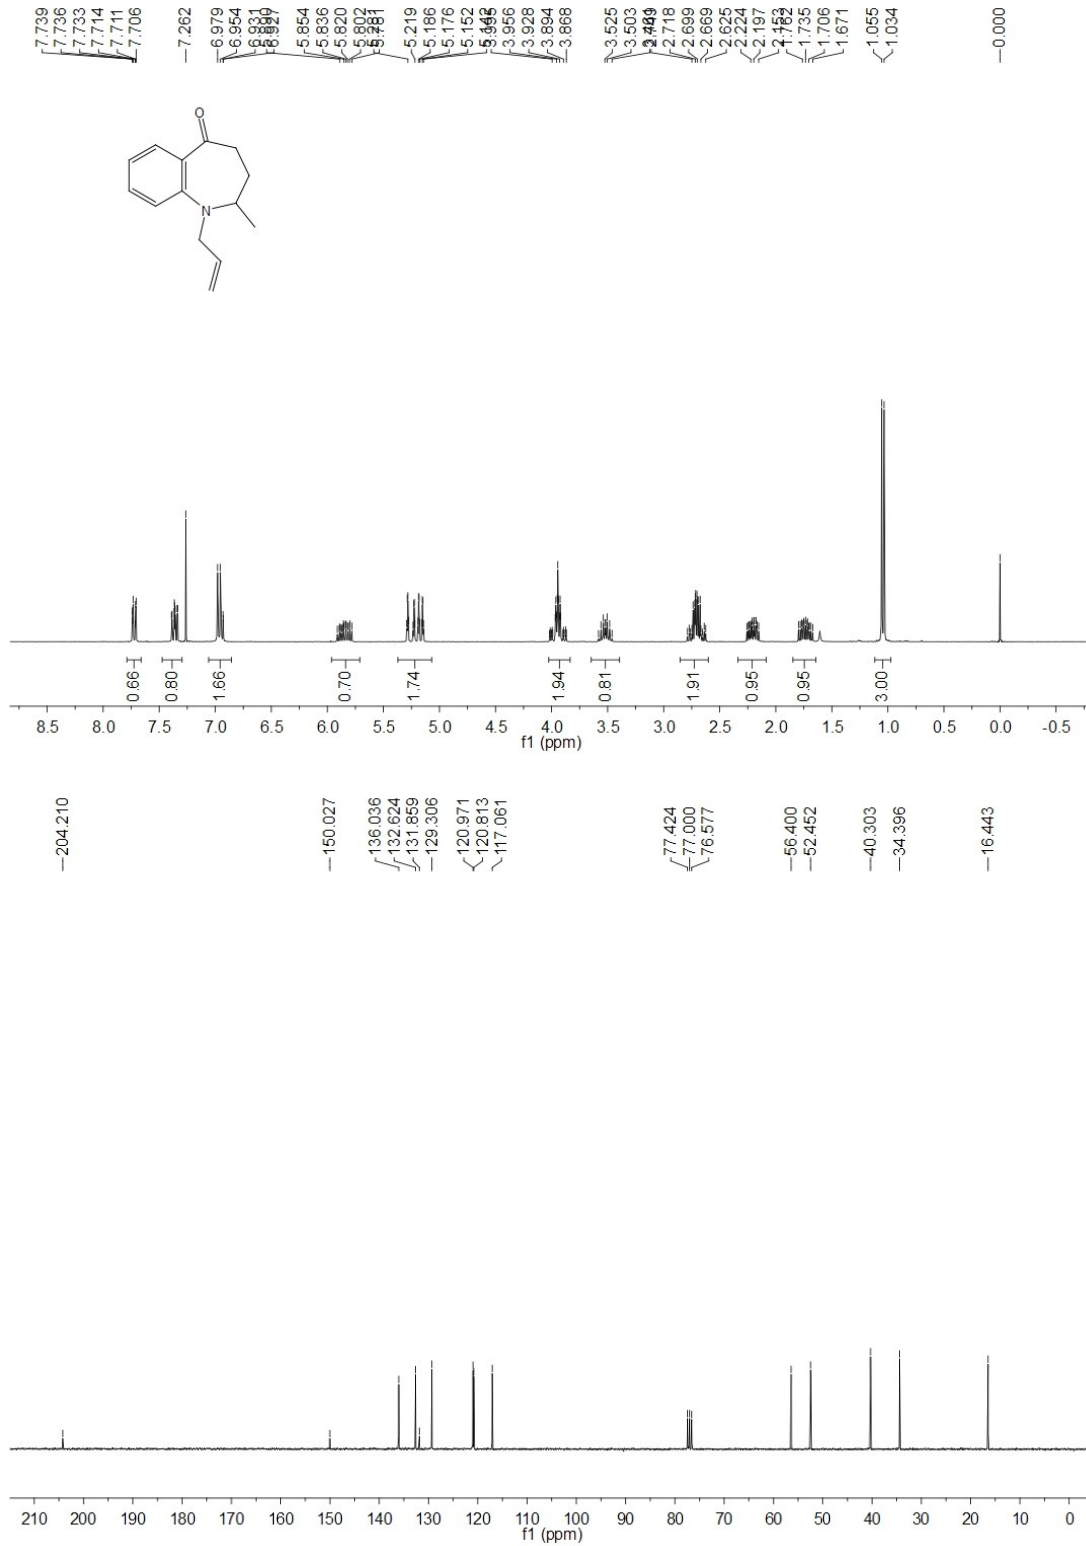

NMR spectrum of Compound **3b**

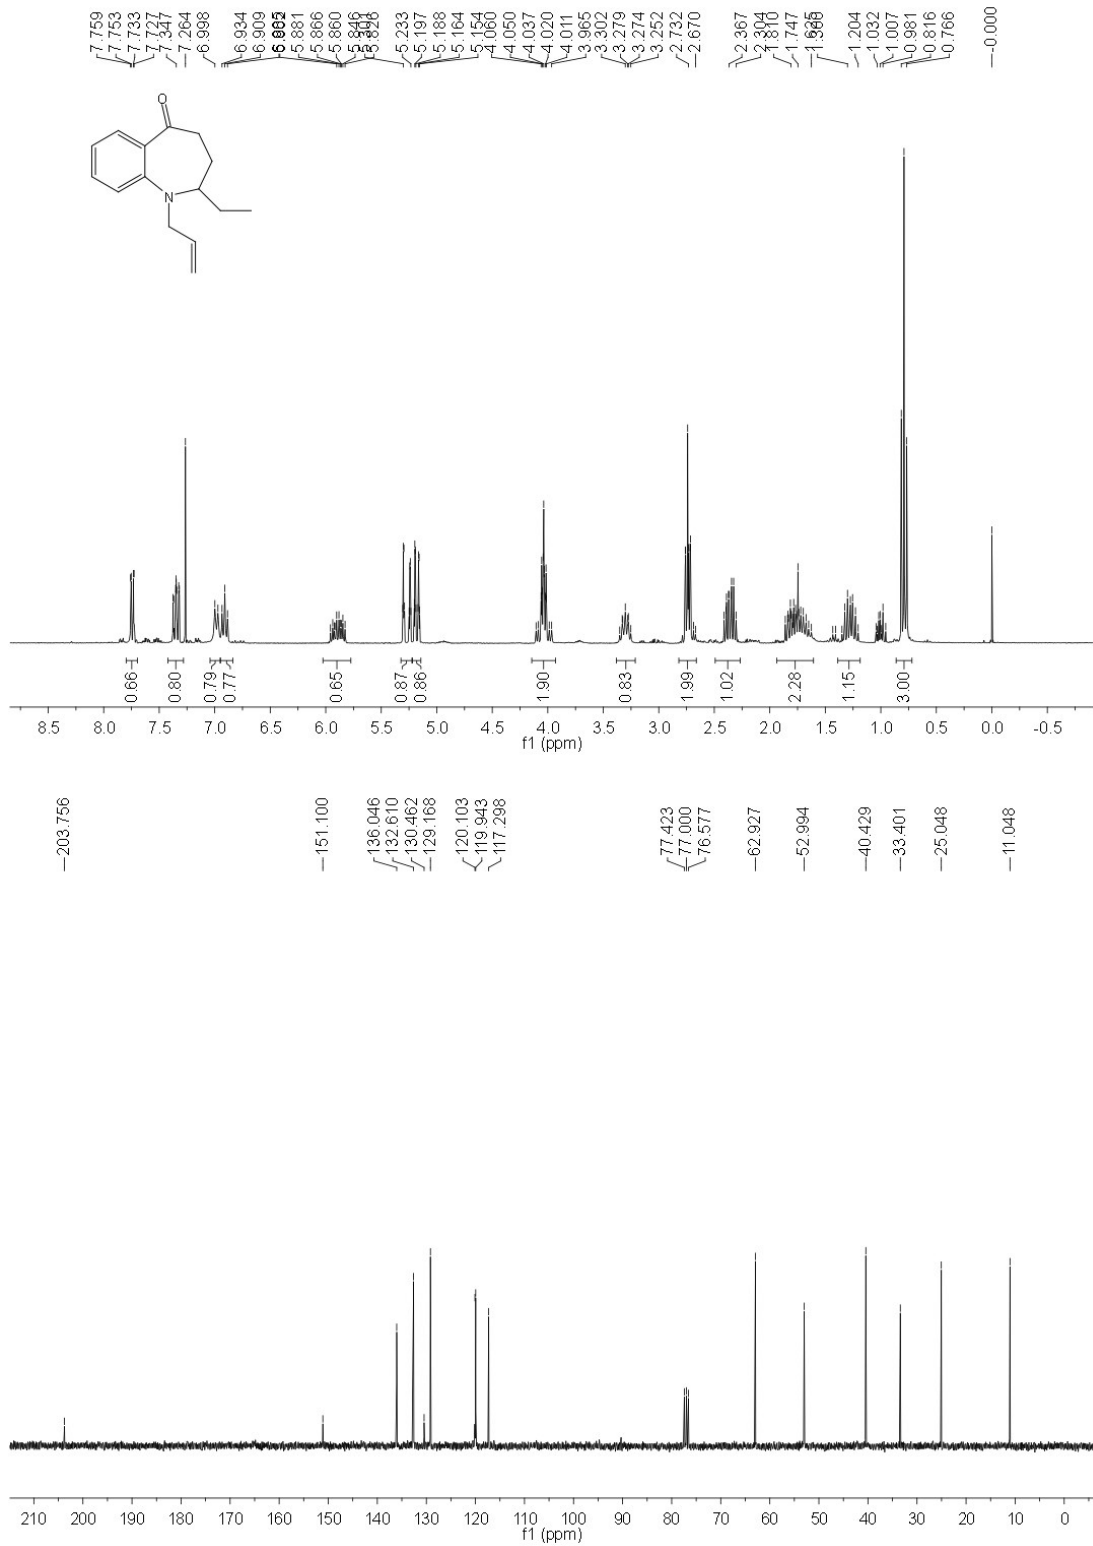

# NMR spectrum of Compound 3c

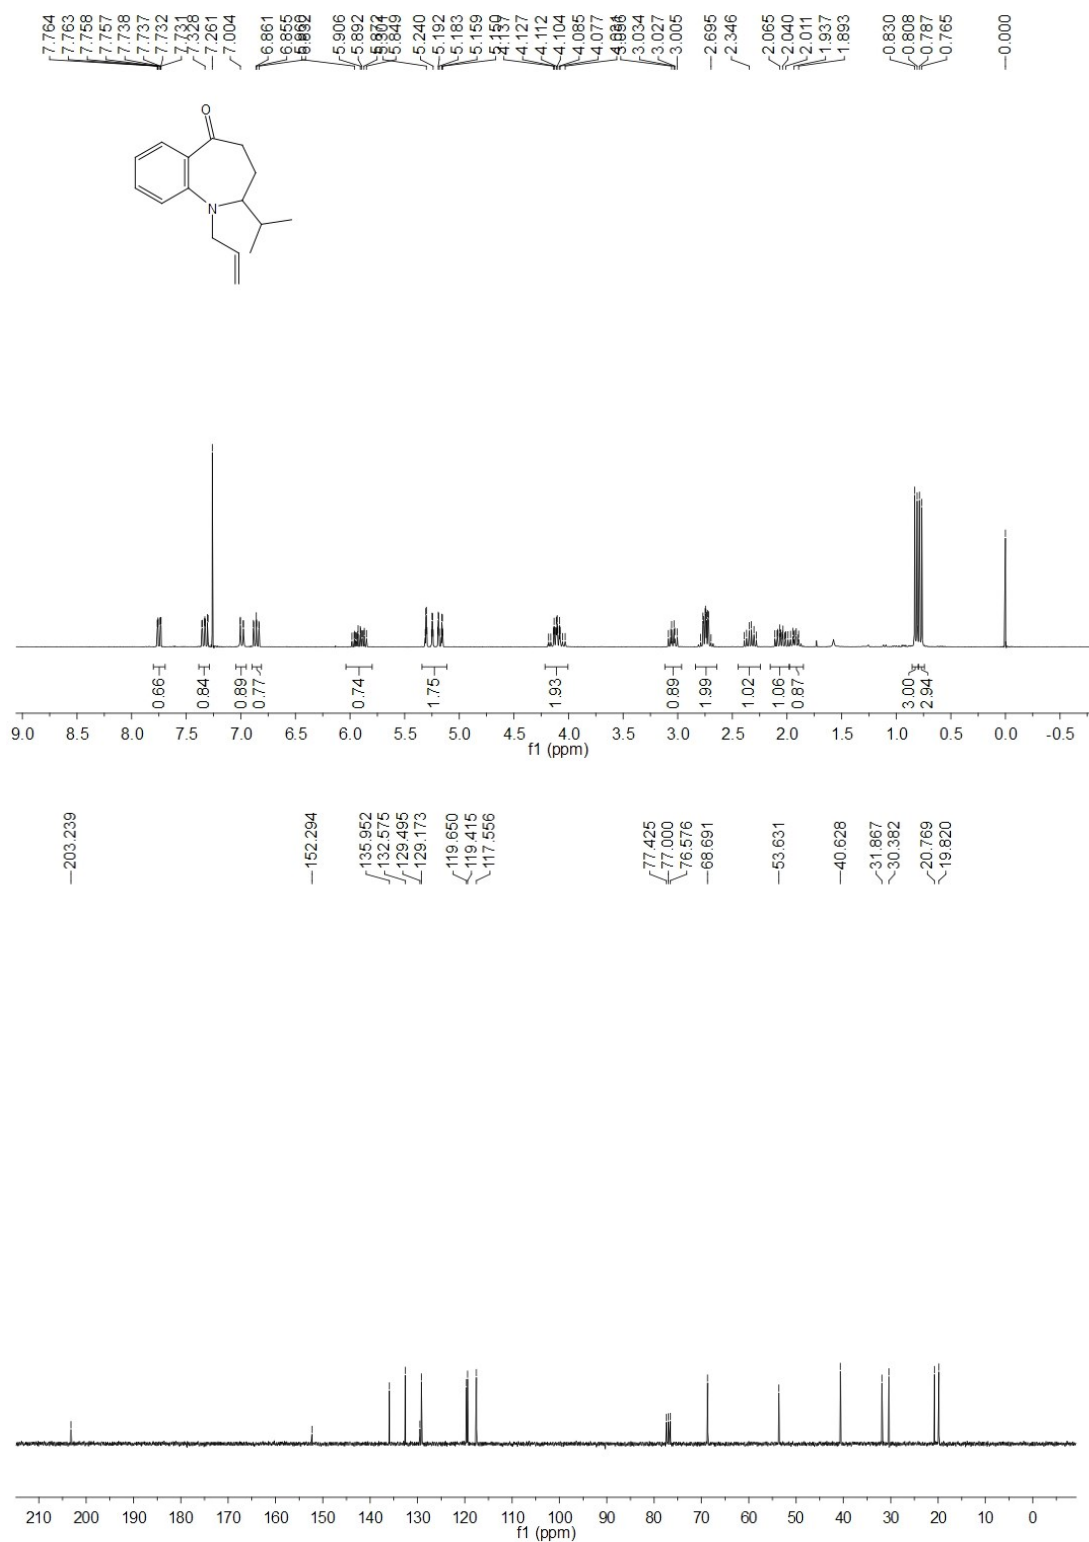

NMR spectrum of Compound **3d**

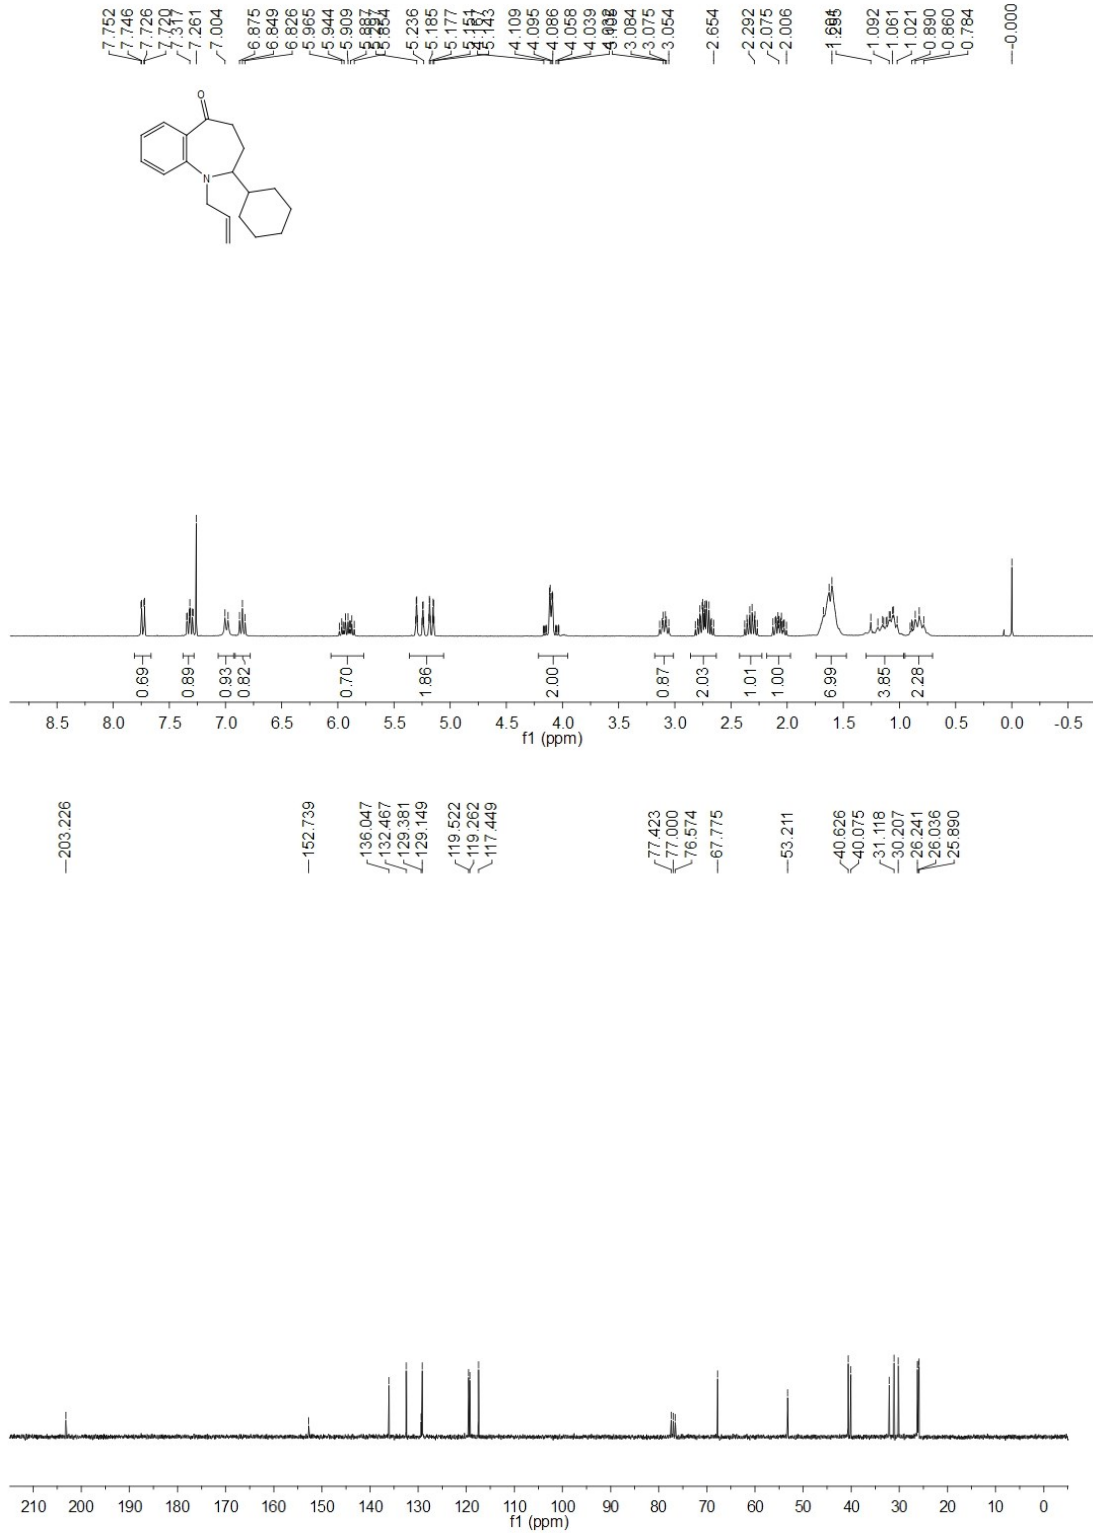



NMR spectrum of Compound **3e**

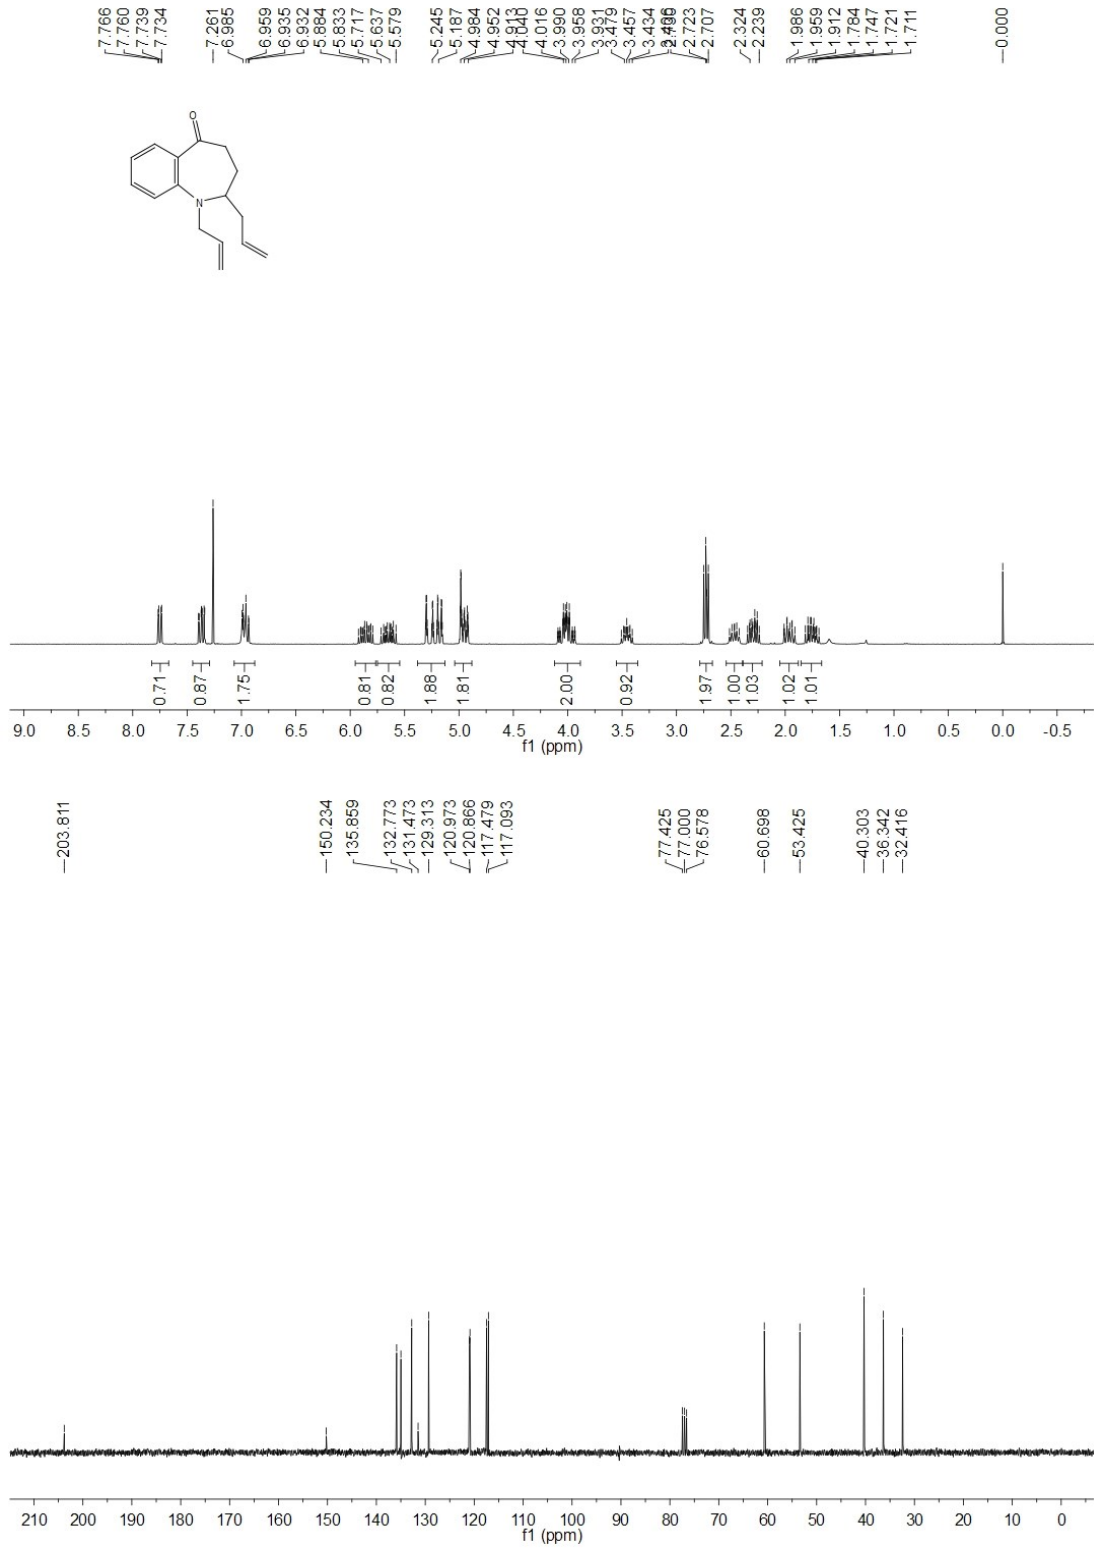

NMR spectrum of Compound **3f**

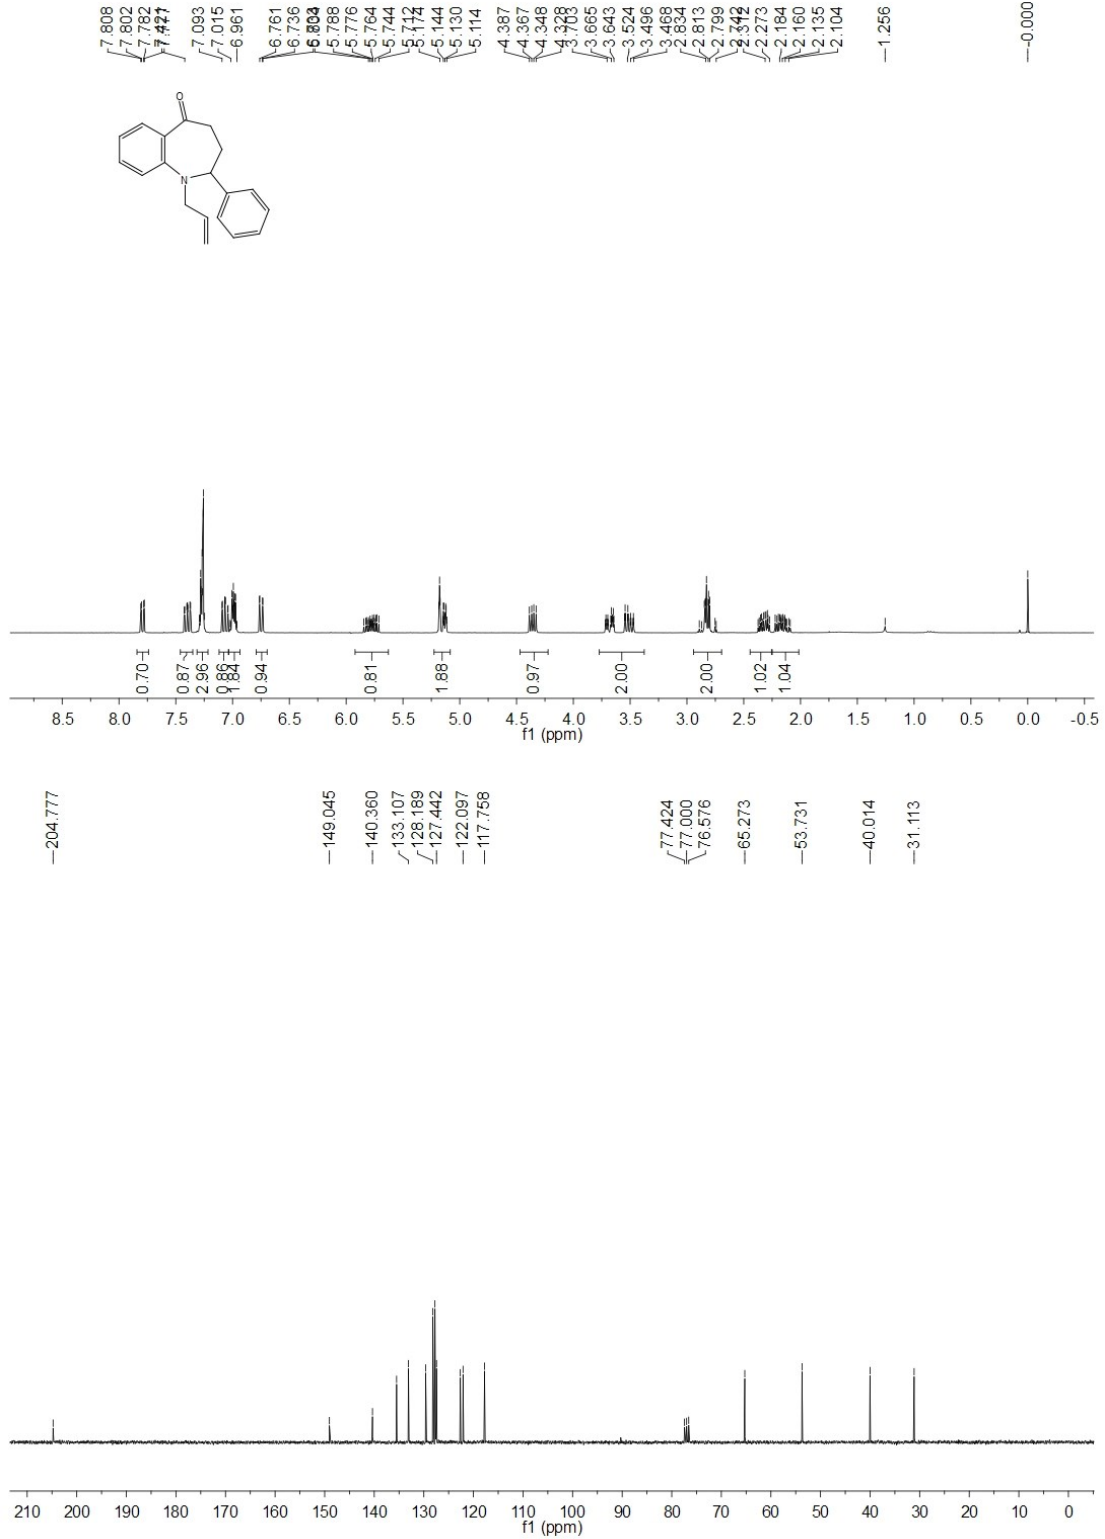

# NMR spectrum of Compound 3g

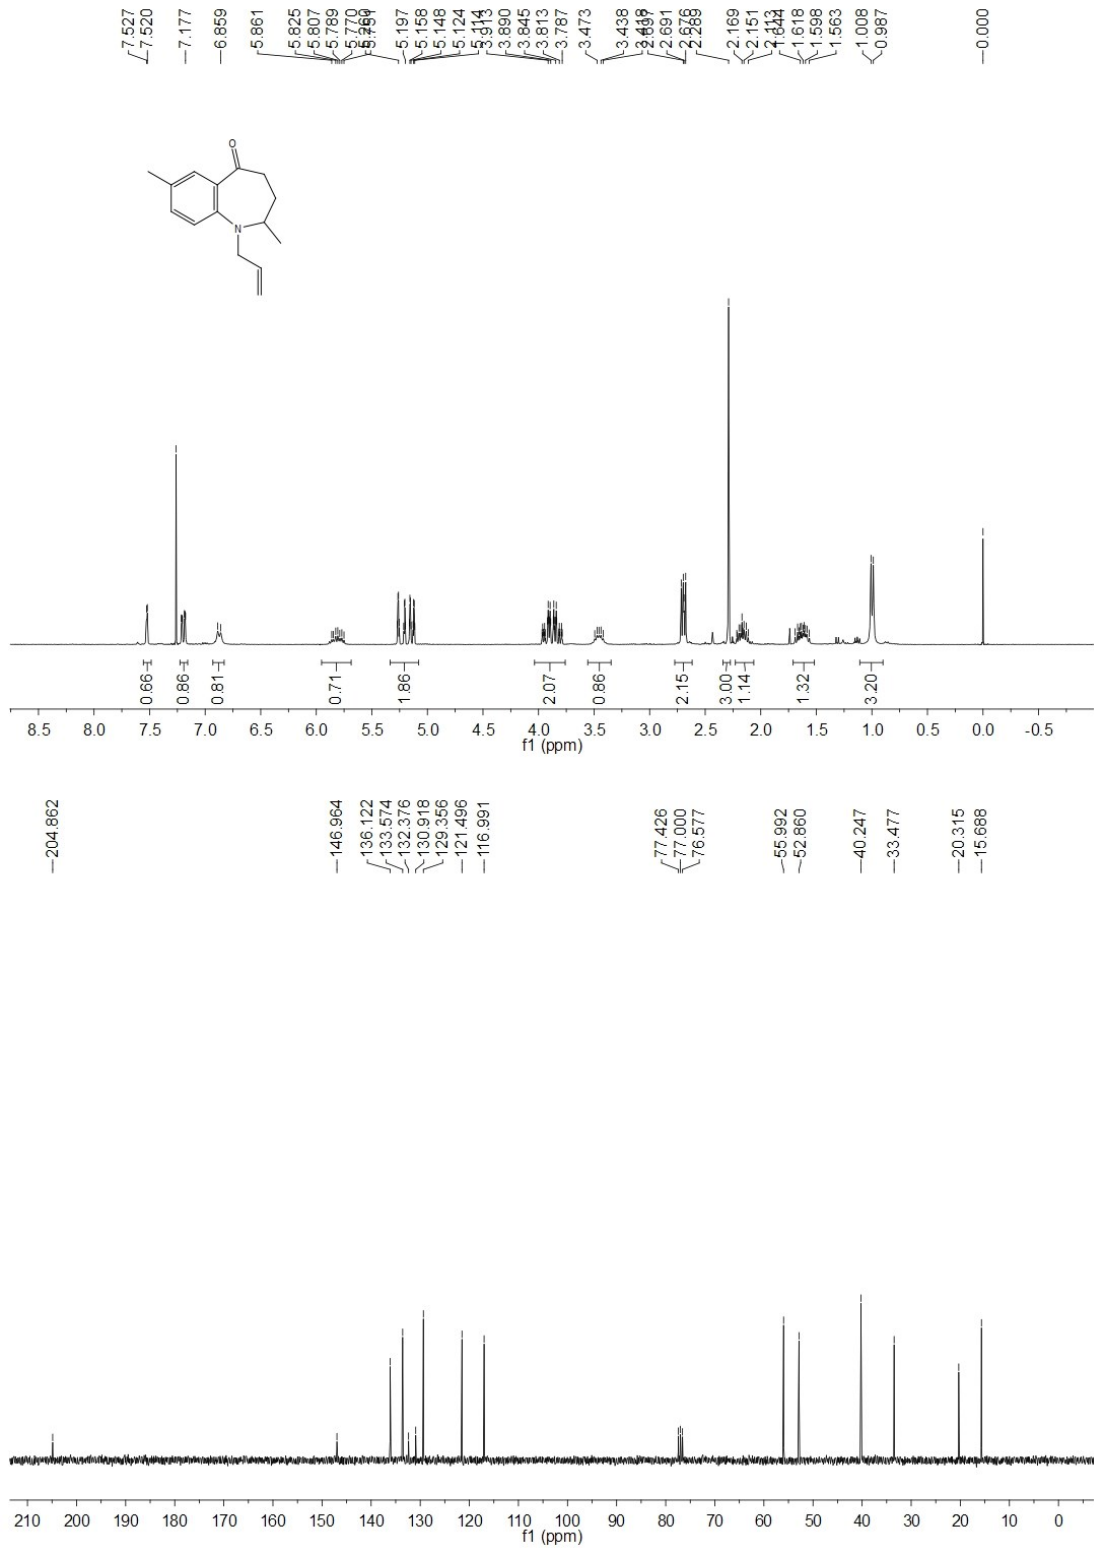

# NMR spectrum of Compound 3h

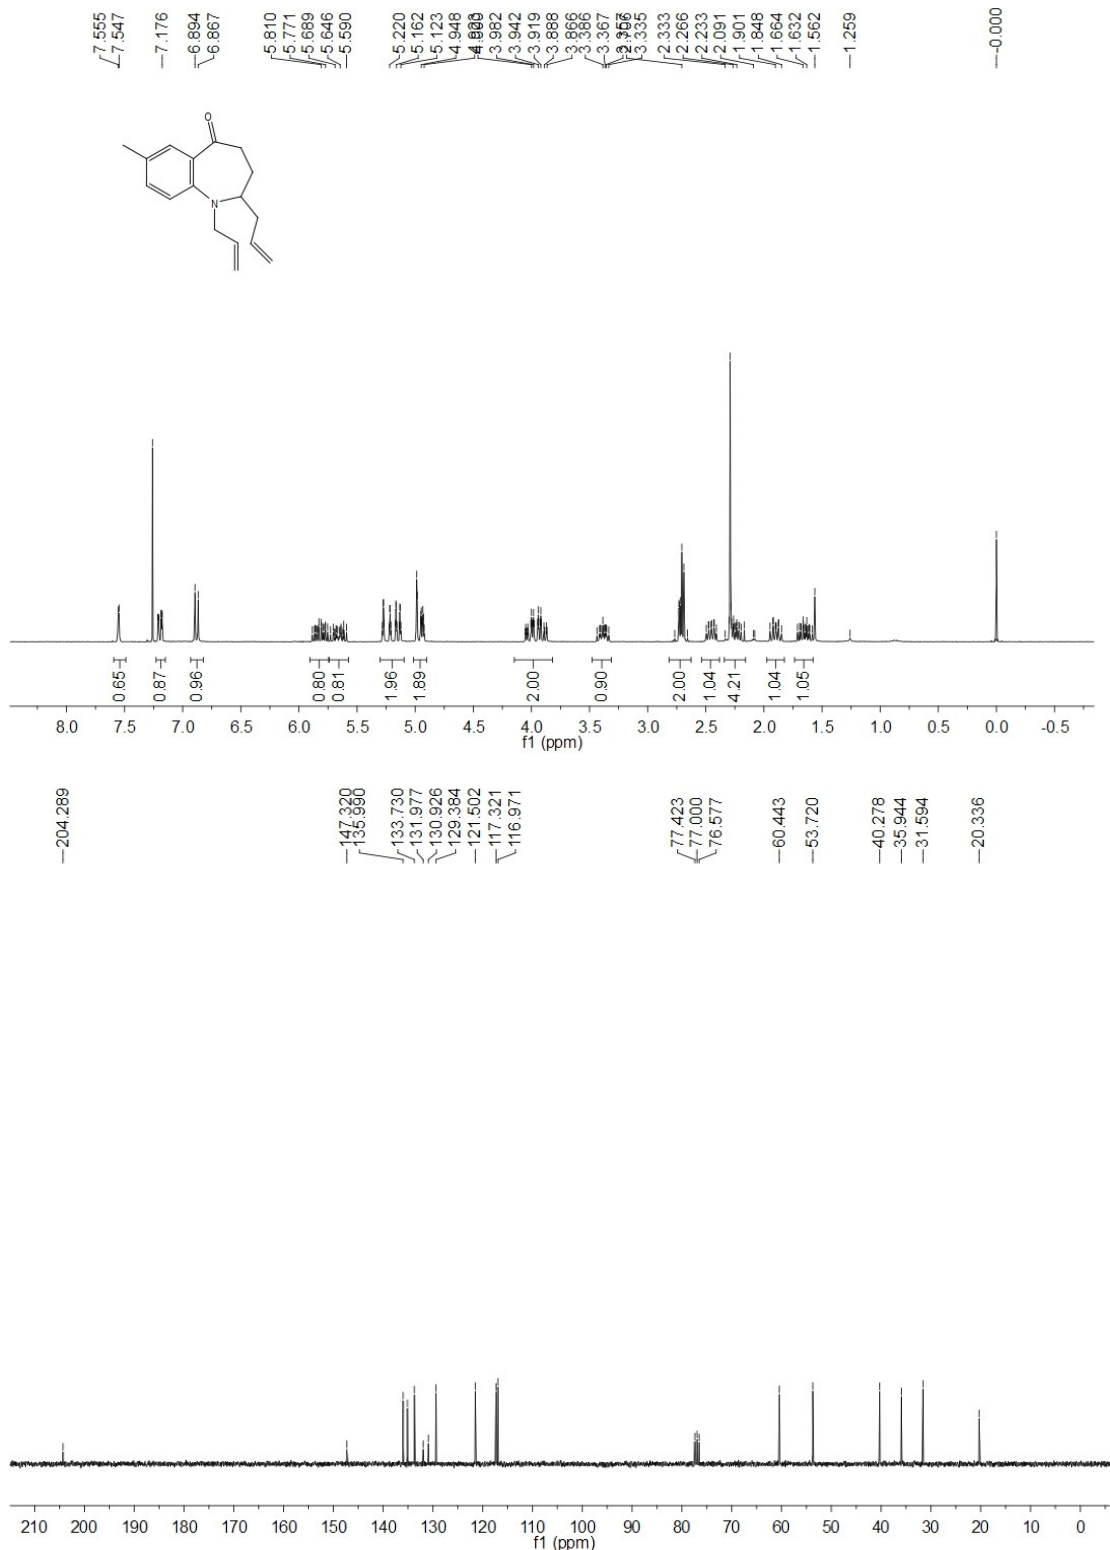

# NMR spectrum of Compound 3i

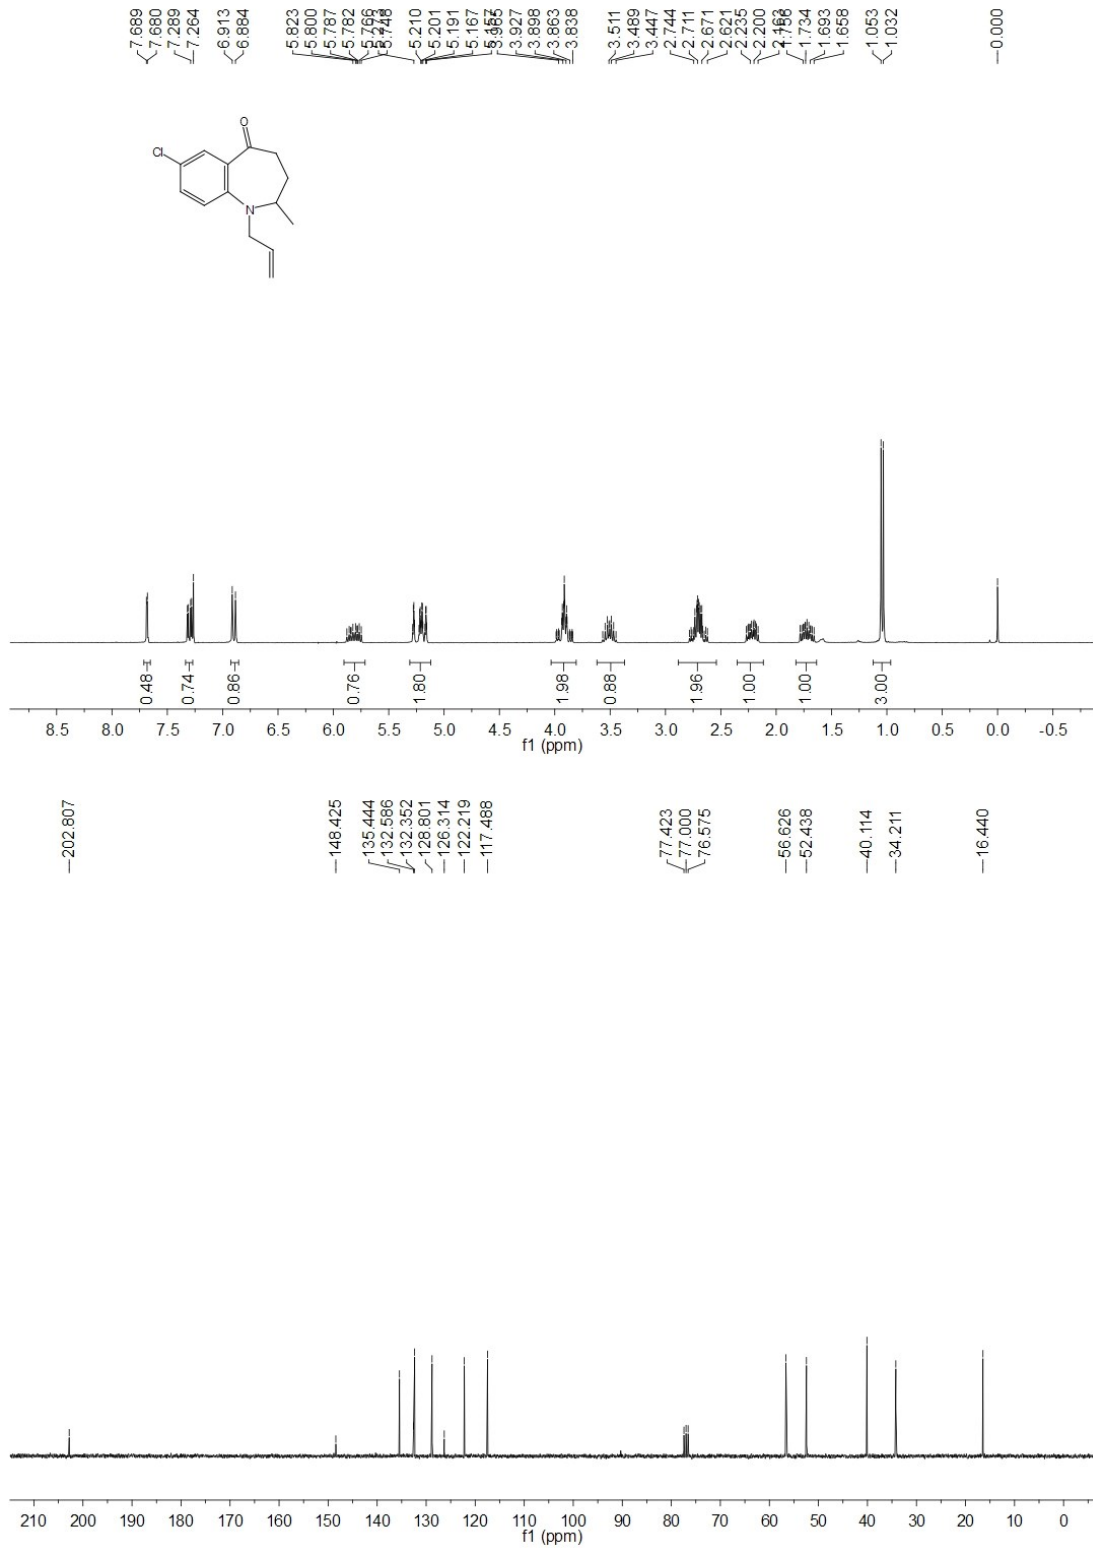

NMR spectrum of Compound **3j**

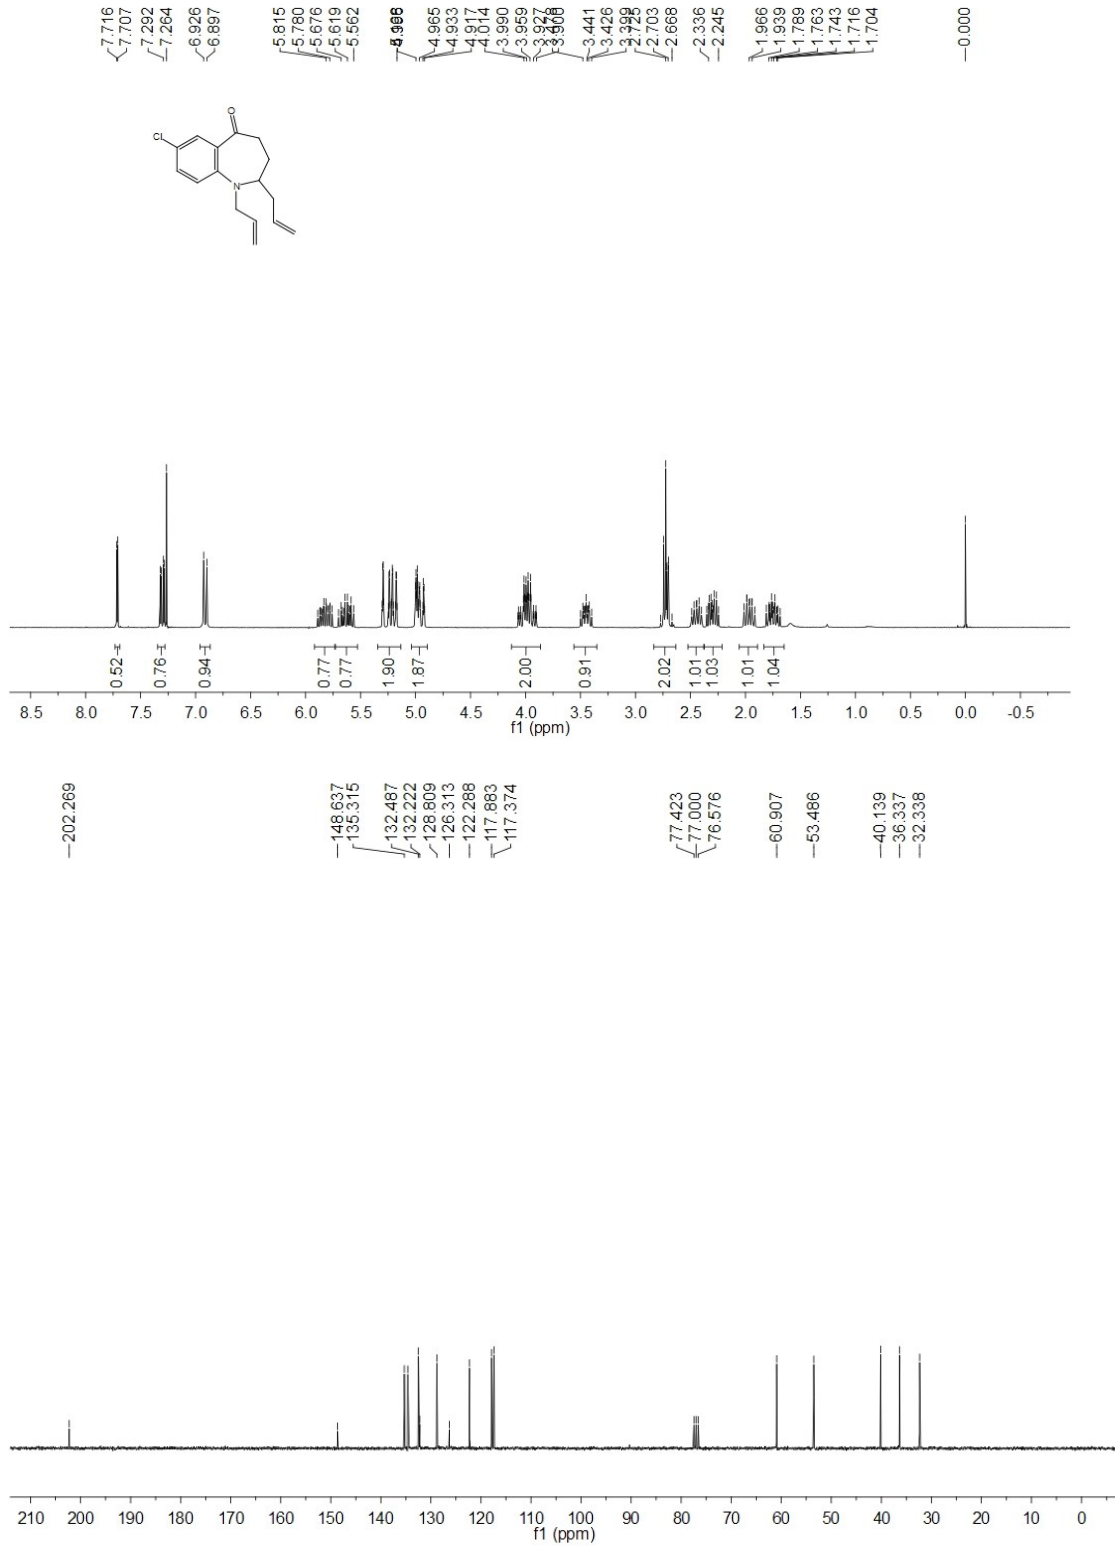

NMR spectrum of Compound **3k**

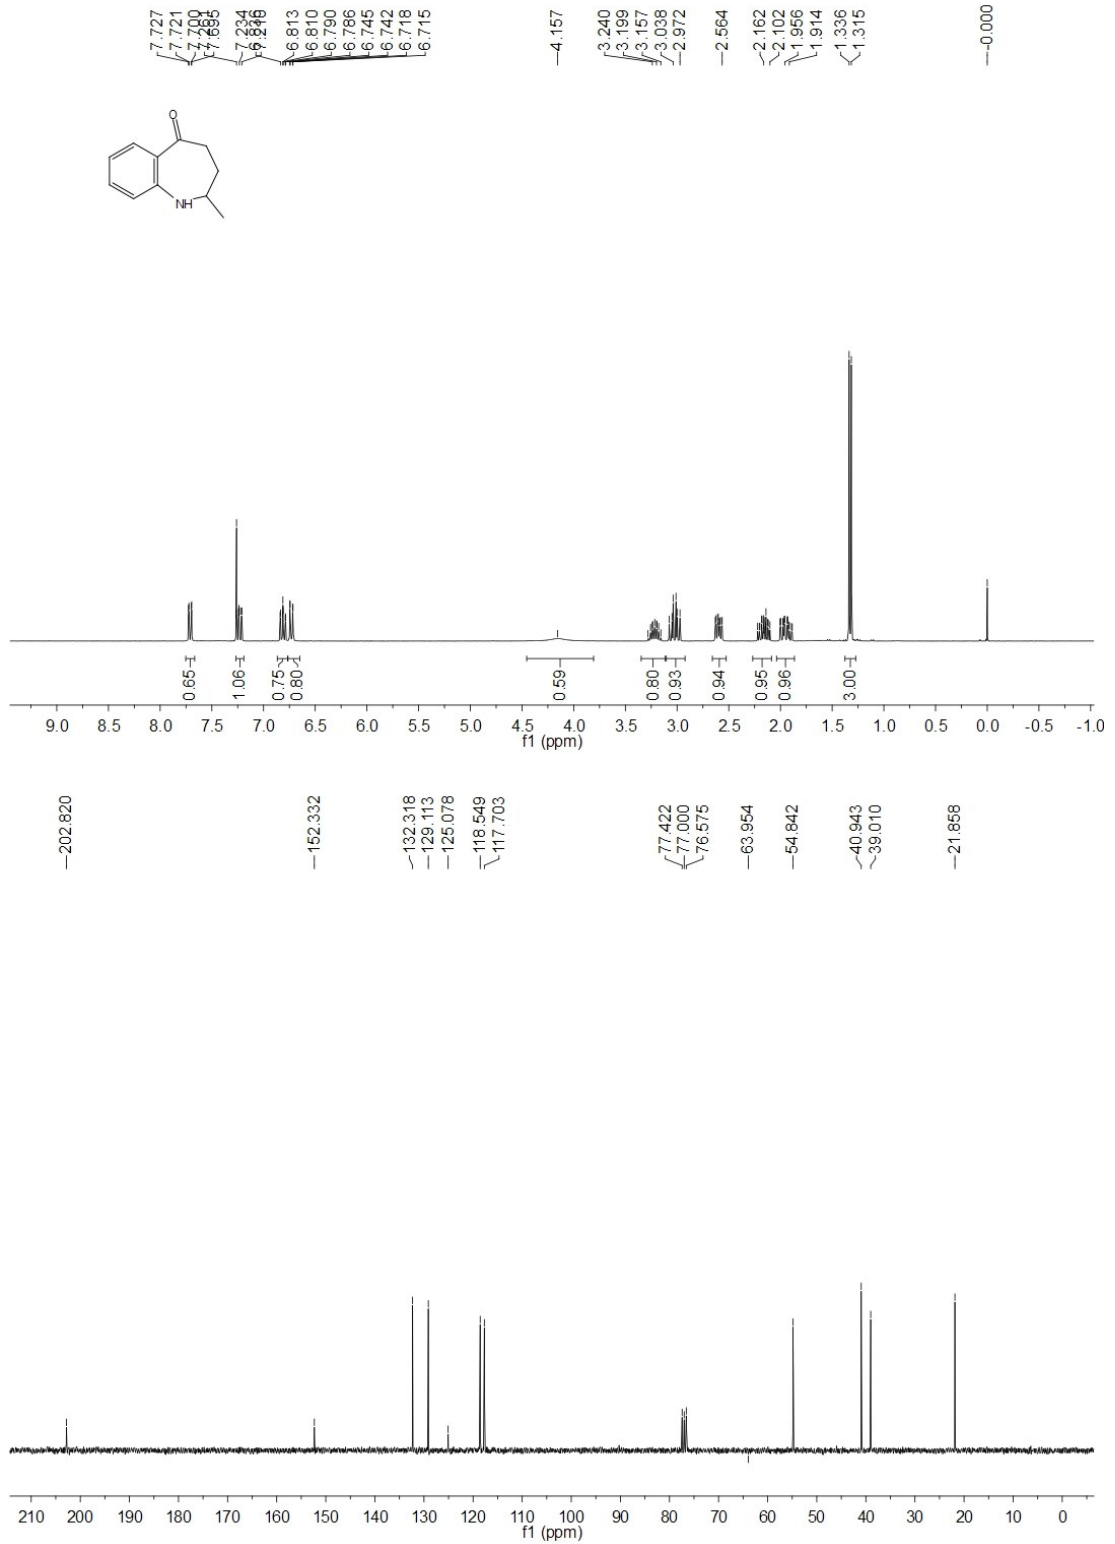

# NMR spectrum of Compound 4

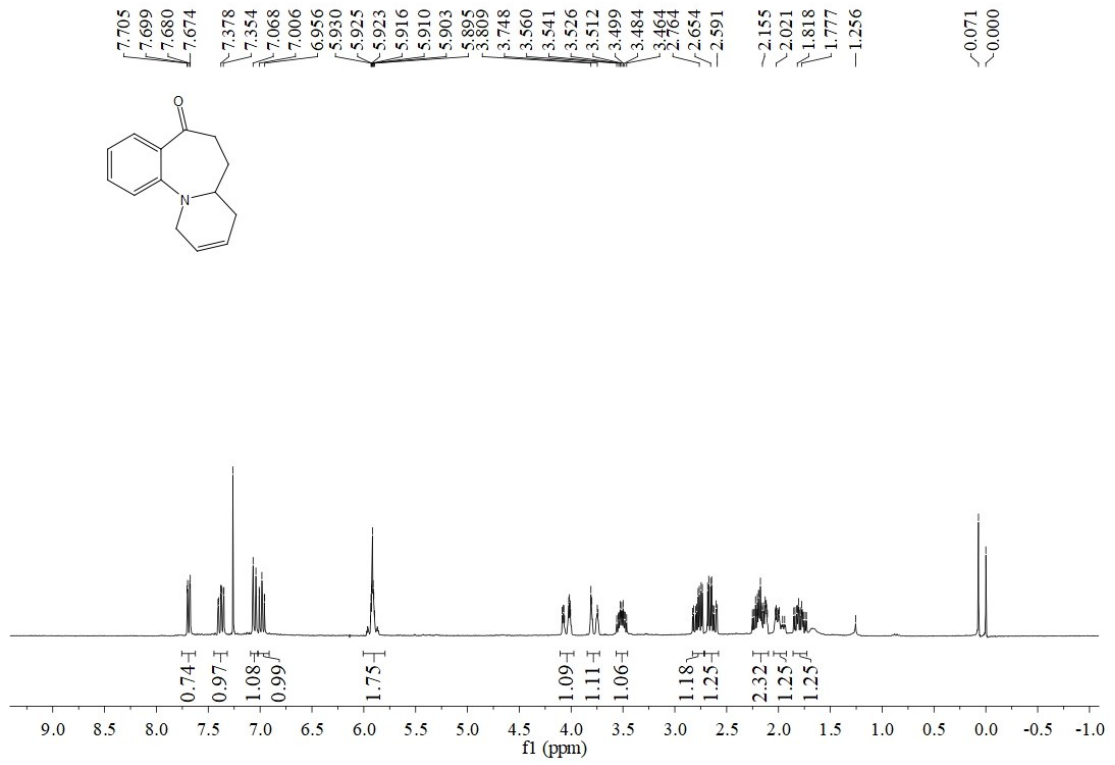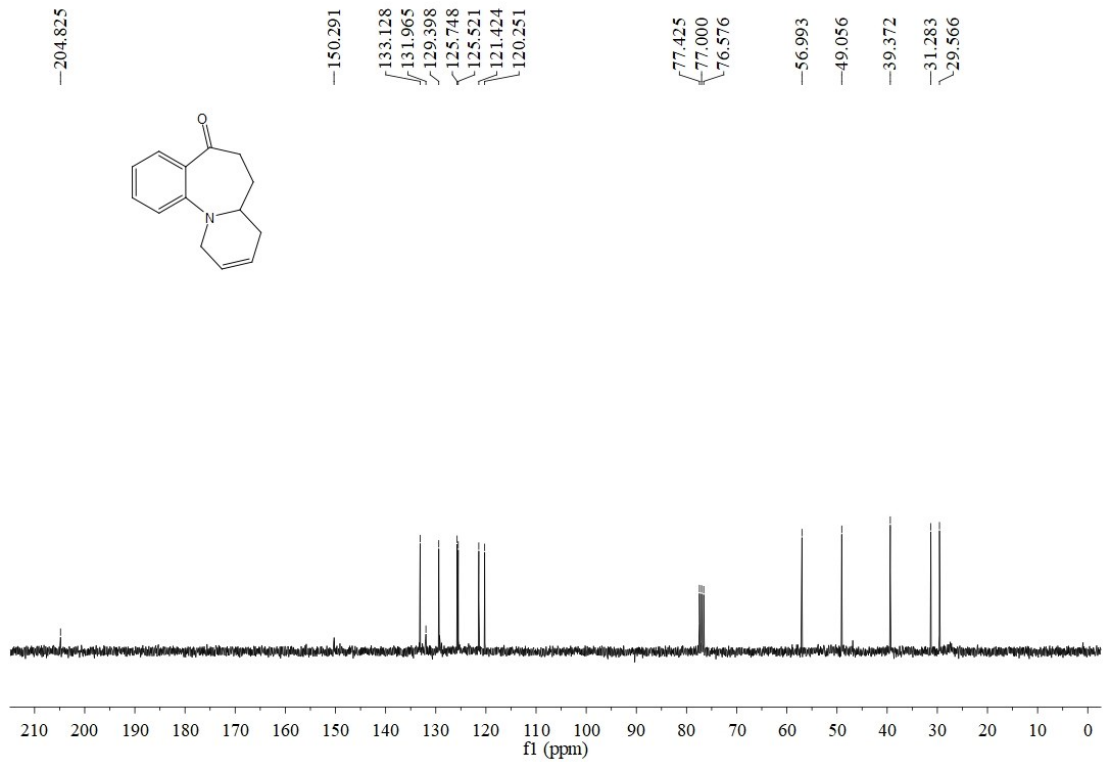



## X-ray Crystallographic data for Compound **syn-2m**

The crystallographic data of **syn-2m** (CCDC 1033762) can be obtained free of charge from The Cambridge Crystallographic Data Centre via [www.ccdc.cam.ac.uk](http://www.ccdc.cam.ac.uk).

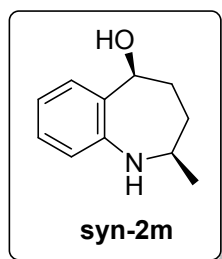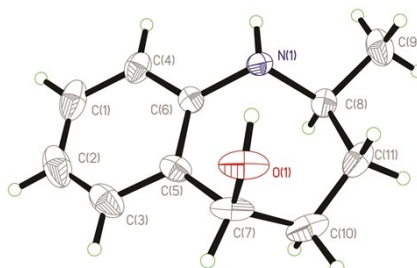

## Confirmation of the ratio of stereoisomers **2**

Through the analysis of  $^1\text{H}$  NMR spectra, the chemical shifts of hydrogen on C1 of different isomers are significantly different. The diastereomeric ratio of compound **2m** were calculated by  $^1\text{H}$  NMR spectroscopy (by comparison of the chemical shifts of the proton  $\text{H}_1$  at 4.81 ppm (**anti-2m**) and 4.76 ppm (**syn-2m**)). In the same way, the diastereomeric ratio of compound **2n** can also be calculated (S-Table 1).

**S-Table 1** Confirmation of the diastereomeric ratio of compound **2m** and **2n**

| Entry | structure                                                                                        | $H(\text{C}1)$                                                             | isomer 1/isomer 2 | syn/anti |
|-------|--------------------------------------------------------------------------------------------------|----------------------------------------------------------------------------|-------------------|----------|
| 1     | 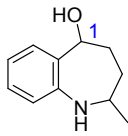<br><b>2m</b> | isomer 1: 4.81 (dd, $J = 8.7, 1.8$ Hz)<br>isomer 2: 4.76 (d, $J = 6.3$ Hz) | 1:10              | 91/9     |
| 2     | <br><b>2n</b> | isomer 1: 4.81 (dd, $J = 8.7, 1.8$ Hz)<br>isomer 2: 4.77 (d, $J = 6.6$ Hz) | 1:3               | 75/25    |

The  $^1\text{H}$  NMR spectrums of the compounds with a substituent attached to the nitrogen atom were quite different from compound **2m**, so the diastereomeric ratio could not be calculated by direct comparison. Therefore, we established the correlation between these two types of compounds using chemical method. Treatment of **2a** and **2e** with  $\text{Pd}(\text{OAc})_2$  and *N,N*-dimethylbarbituric acid (NDMBA) proceeded to give **2m** and **2n**, without affecting the chirality of the substrate<sup>[1-9]</sup>. Then, the diastereomeric ratio of **2a** and **2e** could be determined (S-Fig. 1 and S-Fig. 2).

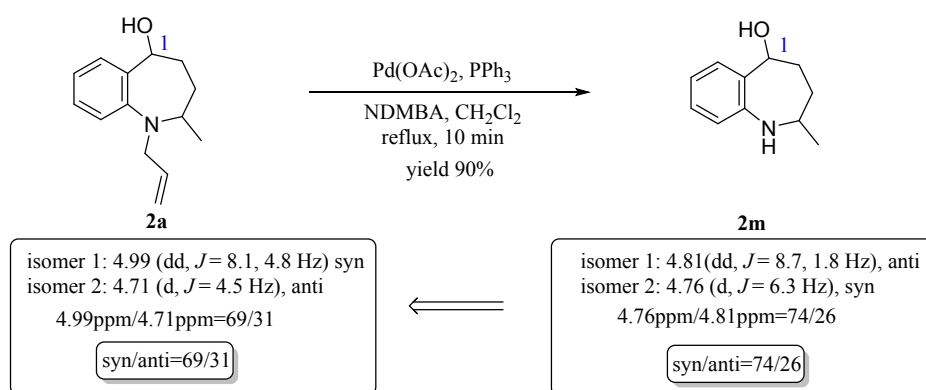

**S-Fig.1** Correlation between compound **2a** and **2m**

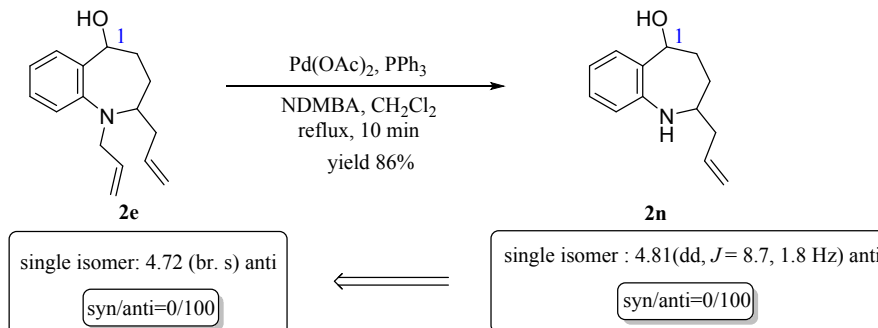

**S-Fig.2** Correlation between compound **2e** and **2n**

The stereochemistry in the rest of the series could be unambiguously assigned by comparison of their NMR spectra with those of **2a** and **2e** (S-Table 2).

**S-Table 2** Confirmation of the diastereomeric ratio of compound **2a-l**

| entry | structure                                                                                        | $H(C1)$                                                                    | isomer 1/ isomer 2 | syn/anti |
|-------|--------------------------------------------------------------------------------------------------|----------------------------------------------------------------------------|--------------------|----------|
| 1     | 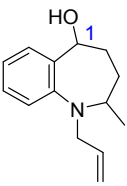<br><b>2a</b>   | isomer 1: 4.99 (dd, $J = 8.1, 4.8$ Hz)<br>isomer 2: 4.71 (t, $J = 4.5$ Hz) | 2.22:1             | 69/31    |
| 2     | <br><b>2b</b>   | isomer 1: 4.89 (dd, $J = 9.6, 3.6$ Hz)<br>isomer 2: 4.71 (br. s)           | 10:1               | 91/9     |
| 3     | <br><b>2c</b>  | 4.83 (dd, $J = 10.2, 3.6$ Hz, 1H).                                         | single             | 100/0    |
| 4     | <br><b>d</b>  | 4.82 (dd, $J = 10.2, 3.3$ Hz)                                              | single             | 100/0    |
| 5     | <br><b>2e</b> | 4.72 (br. s, 1H)                                                           | single             | 0/100    |
| 6     | <br><b>2f</b> | 5.36 (t, $J = 8.1$ Hz, 1H)                                                 | single             | 100/0    |

|    |                                                                                                      |                                                                            |        |       |
|----|------------------------------------------------------------------------------------------------------|----------------------------------------------------------------------------|--------|-------|
| 7  | 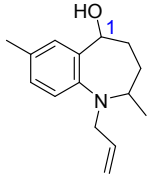 <p><b>2g</b></p>   | isomer 1: 4.98 (dd, $J = 7.8, 4.8$ Hz)<br>isomer 2: 4.64 (t, $J = 4.5$ Hz) | 7.69:1 | 88/12 |
| 8  |  <p><b>2h</b></p>   | 4.67 (br. s)                                                               | single | 0/100 |
| 9  |  <p><b>2i</b></p>   | isomer 1: 4.96 (dd, $J = 8.7, 4.5$ Hz)<br>isomer 2: 4.68 (br. s)           | 2.04:1 | 67/33 |
| 10 |  <p><b>2j</b></p> | 4.69 (br. s)                                                               | single | 0/100 |
| 11 |  <p><b>2k</b></p> | isomer 1: 4.80 (t, $J = 4.5$ Hz)<br>isomer 2: 4.77 (d)                     | 2.13:1 | 68/32 |
| 12 |  <p><b>2l</b></p> | 4.80 (dd, $J = 9.9, 4.2$ Hz)                                               | single | 100/0 |

## References:

1. F. Garro-Helion, A. Merzouk and F. Guibe, *J. Org. Chem.*, 1993, **58**, 6109-6113.
2. S. Lemaire-Audoire, M. Savignac, J. P. Genêt and J.-M. Bernard, *Tetrahedron Lett.*, 1995, **36**, 1267-1270.
3. Z. Ling, L. Yun, L. Liu, B. Wu and X. Fu, *Chem. Commun.*, 2013, **49**, 4214-4216.
4. S. G. Davies, A. M. Fletcher, J. A. Lee, T. J. A. Lorkin, P. M. Roberts and J. E. Thomson, *Tetrahedron*, 2013, **69**, 9779-9803.
5. S. Norsikian, J.-F. Soulé, A. Cannillo, R. Guillot, M.-E. Tran Huu Dau and J.-M. Beau, *Org. Lett.*, 2012, **14**, 544-547.
6. S. G. Davies, J. R. Haggitt, O. Ichihara, R. J. Kelly, M. A. Leech, A. J. Price Mortimer, P. M. Roberts and A. D. Smith, *Org. Biomol. Chem.*, 2004, **2**, 2630-2649.
7. S. Lou and S. E. Schaus, *J. Am. Chem. Soc.*, 2008, **130**, 6922-6923.
8. J. I. Candela-Lena, S. G. Davies, P. M. Roberts, B. Roux, A. J. Russell, E. M. Sánchez-Fernández and A. D. Smith, *Tetrahedron: Asymmetry*, 2006, **17**, 1135-1145.
9. S. G. Davies, A. M. Fletcher, J. A. Lee, T. J. A. Lorkin, P. M. Roberts and J. E. Thomson, *Org. Lett.*, 2013, **15**, 2050-2053.
